# Supplementary material for: Crucial Factors Regulating Intramolecular Charge-Transfer-Based Radiative Efficiency in ortho-Carboranyl Luminophores: Planarity between Substituted Biphenyl Rings
Source: PubMed Central journal article supplement — ACS Omega. 2022 Jun 30;7(27):24027–39. doi: 10.1021/acsomega.2c03344 (PMC9281304; doi:10.1021/acsomega.2c03344), 2022-06-30
Supplement: ao2c03344_si_001.pdf [file ao2c03344_si_001.pdf]

## Supporting Information

# Crucial factor regulating intramolecular charge-transfer-based radiative efficiency in *ortho*-carboranyl luminophores : Planarity between substituted biphenyl rings

Mingi Kim,<sup>a</sup> Chan Hee Ryu,<sup>a</sup> Dong Kyun You,<sup>a</sup> Ju Hyun Hong,<sup>a</sup> and Kang Mun Lee\*<sup>a</sup>

<sup>a</sup>Department of Chemistry, Institute for Molecular Science and Fusion Technology, Kangwon National University, Chuncheon, Gangwon 24341, Republic of Korea

### Contents

|                                                                                                                          |         |
|--------------------------------------------------------------------------------------------------------------------------|---------|
| NMR spectra of <i>o</i> -carboranyl compounds and their precursors .....                                                 | S2–S41  |
| Crystallographic data and parameters of <i>o</i> -carboranyl compounds .....                                             | S42–S43 |
| Selected bond lengths (Å) and angles (°) of <i>o</i> -carboranyl compounds .....                                         | S44     |
| UV-vis absorption and PL spectra for the <i>o</i> -carboranyl compounds .....                                            | S45     |
| Photophysical data of <i>o</i> -carboranyl compounds .....                                                               | S46     |
| UV-vis absorption and PL spectra for 1,1'-biphenyl .....                                                                 | S47     |
| Calculated electronic transitions for <i>o</i> -carboranyl compounds at the ground state .....                           | S48     |
| Emission decay curves for <i>o</i> -carboranyl compounds in the crystalline state .....                                  | S49     |
| Radiative and nonradiative decay constants vs. calculated dihedral angles .....                                          | S50     |
| $\lambda_{\text{calc}}$ , $f_{\text{calc}}$ , and frontier orbitals of <b>5HH</b> as a function of dihedral angles ..... | S51     |
| Theoretical calculation details for <i>o</i> -carboranyl compounds .....                                                 | S52–S90 |
| Cartesian coordinates for each optimized structure of <i>o</i> -carboranyl compounds .....                               | S91–S11 |

6

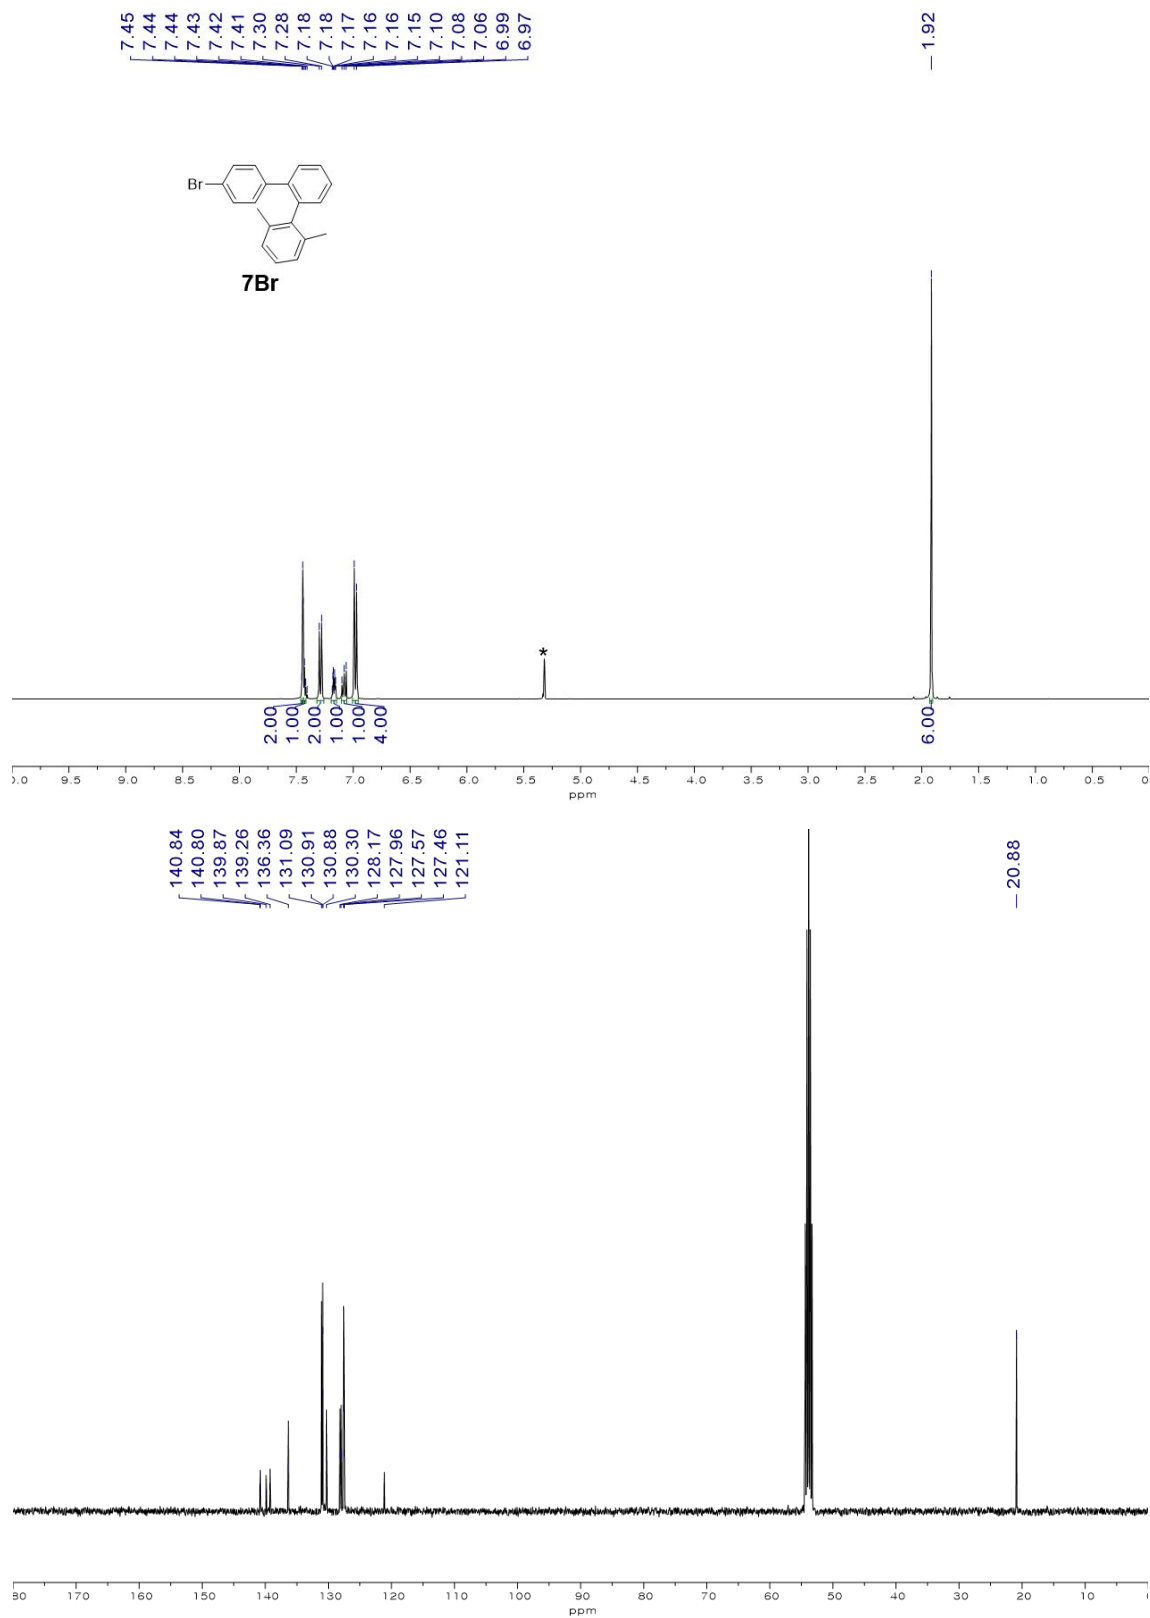

**Figure S1.** <sup>1</sup>H (top) and <sup>13</sup>C (bottom) NMR spectra of **7Br** in CD<sub>2</sub>Cl<sub>2</sub> (\* from residual CH<sub>2</sub>Cl<sub>2</sub> in CD<sub>2</sub>Cl<sub>2</sub>).

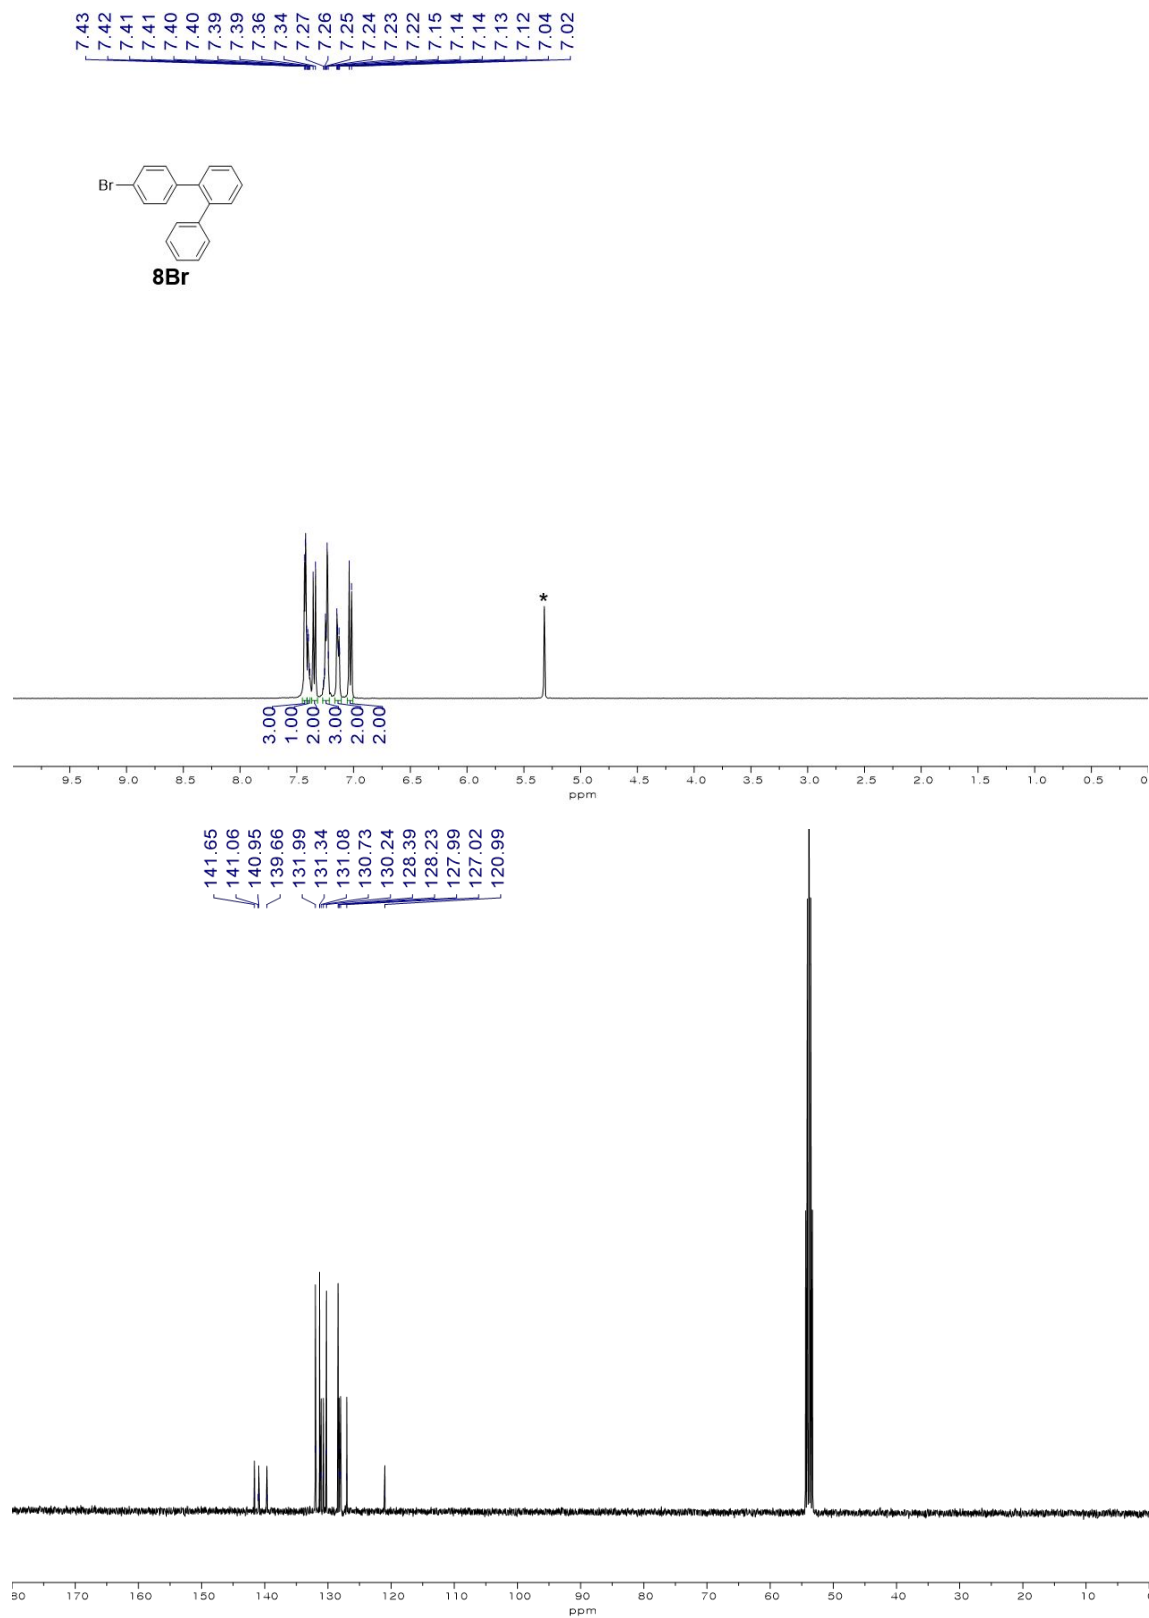

**Figure S2.** <sup>1</sup>H (top) and <sup>13</sup>C (bottom) NMR spectra of **8Br** in CD<sub>2</sub>Cl<sub>2</sub> (\* from residual CH<sub>2</sub>Cl<sub>2</sub> in CD<sub>2</sub>Cl<sub>2</sub>).

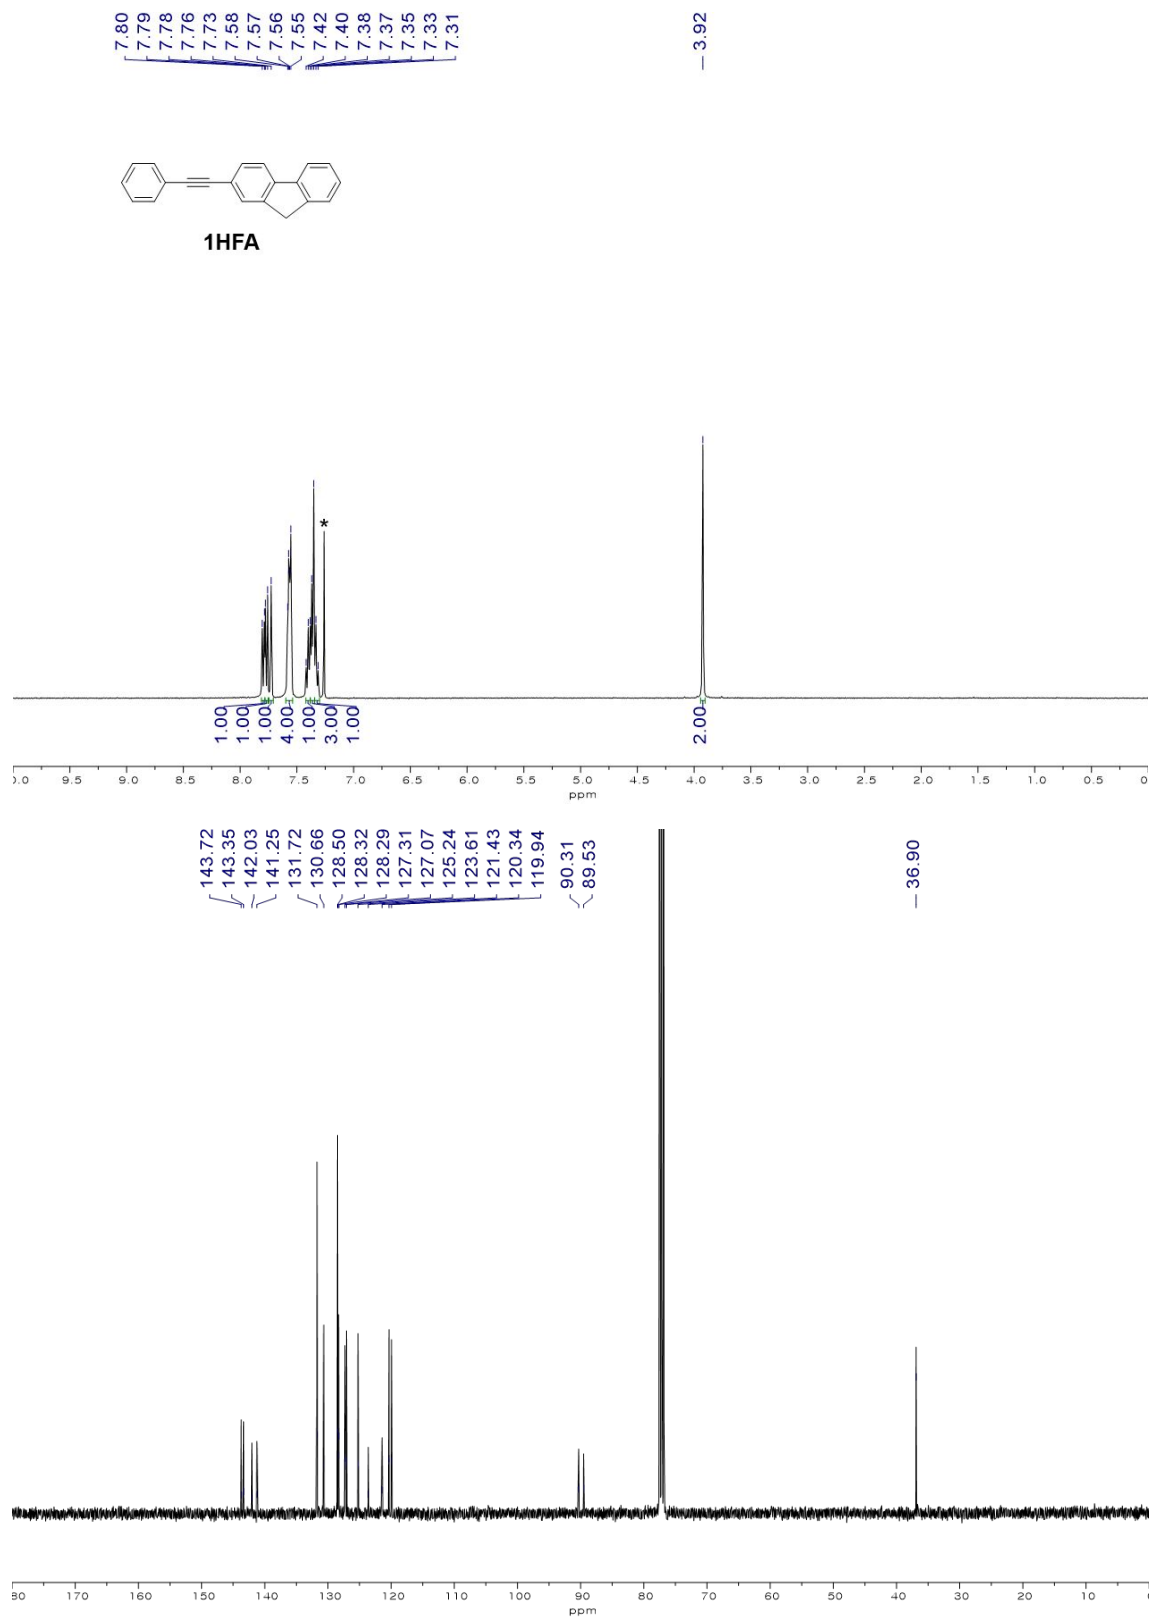

**Figure S3.** <sup>1</sup>H (top) and <sup>13</sup>C (bottom) NMR spectra of **1HFA** in CDCl<sub>3</sub> (\* from residual CHCl<sub>3</sub> in CDCl<sub>3</sub>).

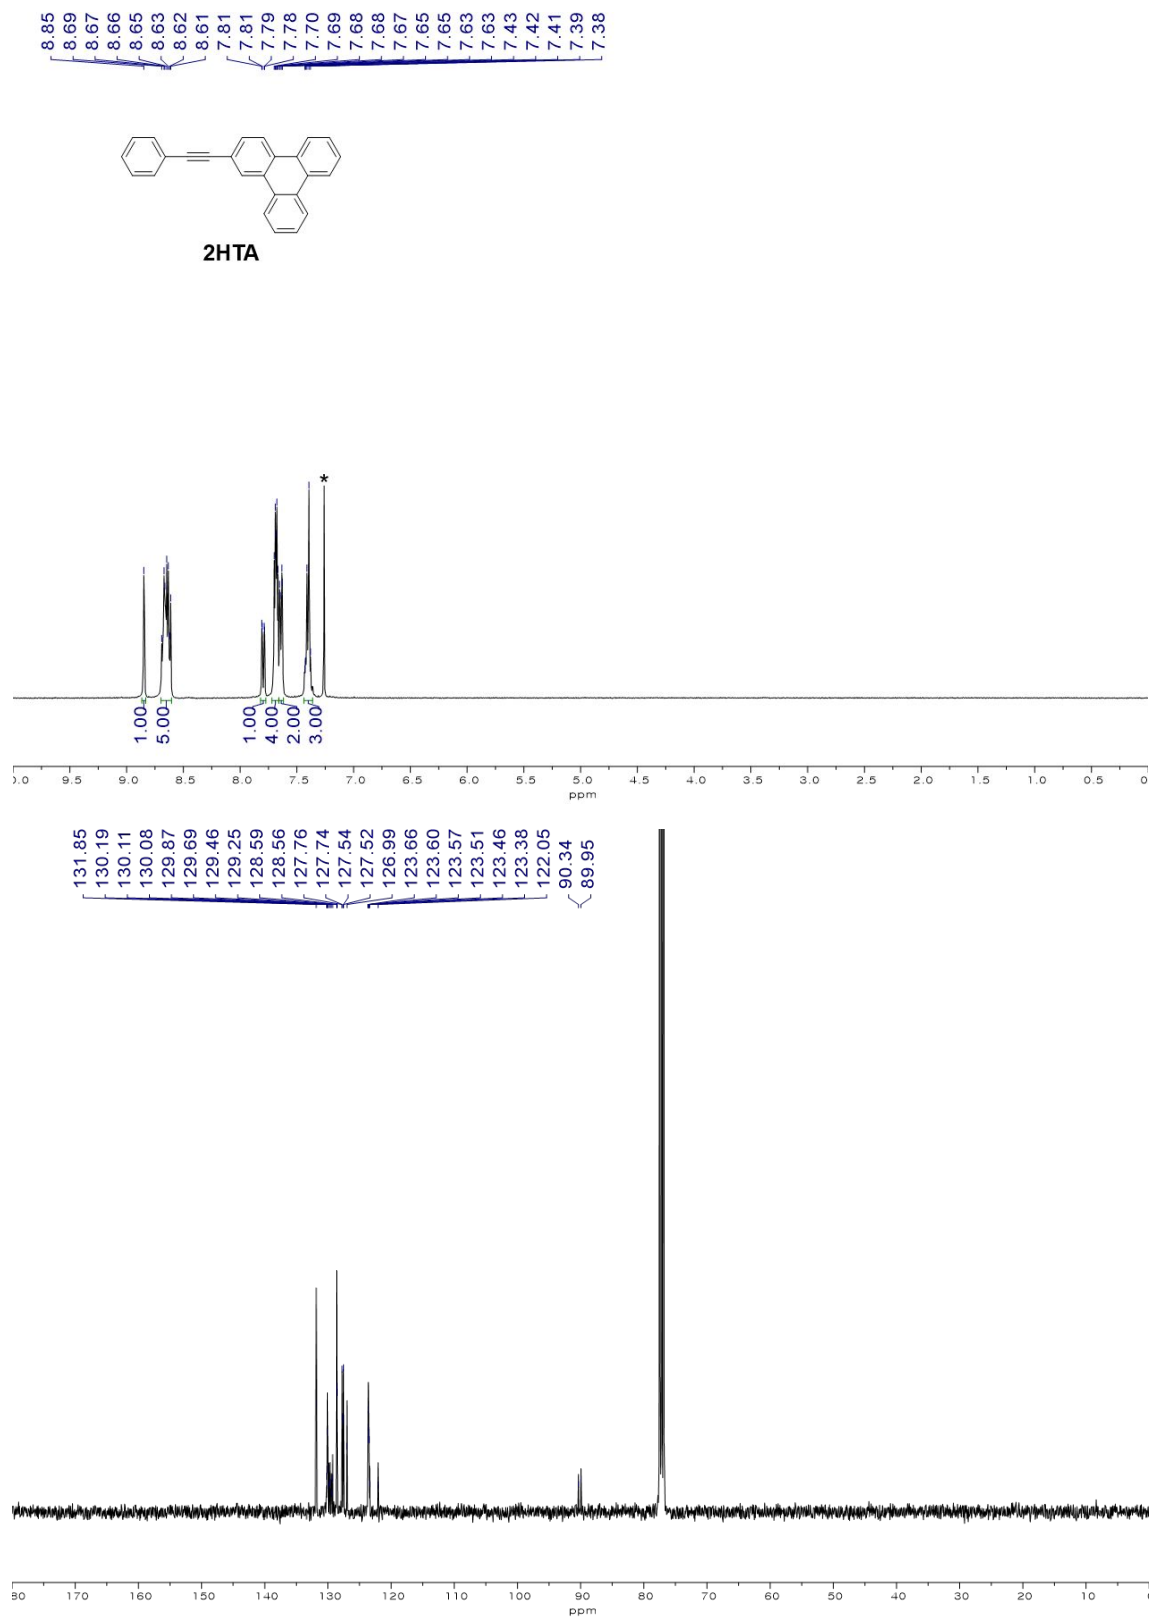

**Figure S4.**  $^1\text{H}$  (top) and  $^{13}\text{C}$  (bottom) NMR spectra of **2HTA** in  $\text{CDCl}_3$  (\* from residual  $\text{CHCl}_3$  in  $\text{CDCl}_3$ ).

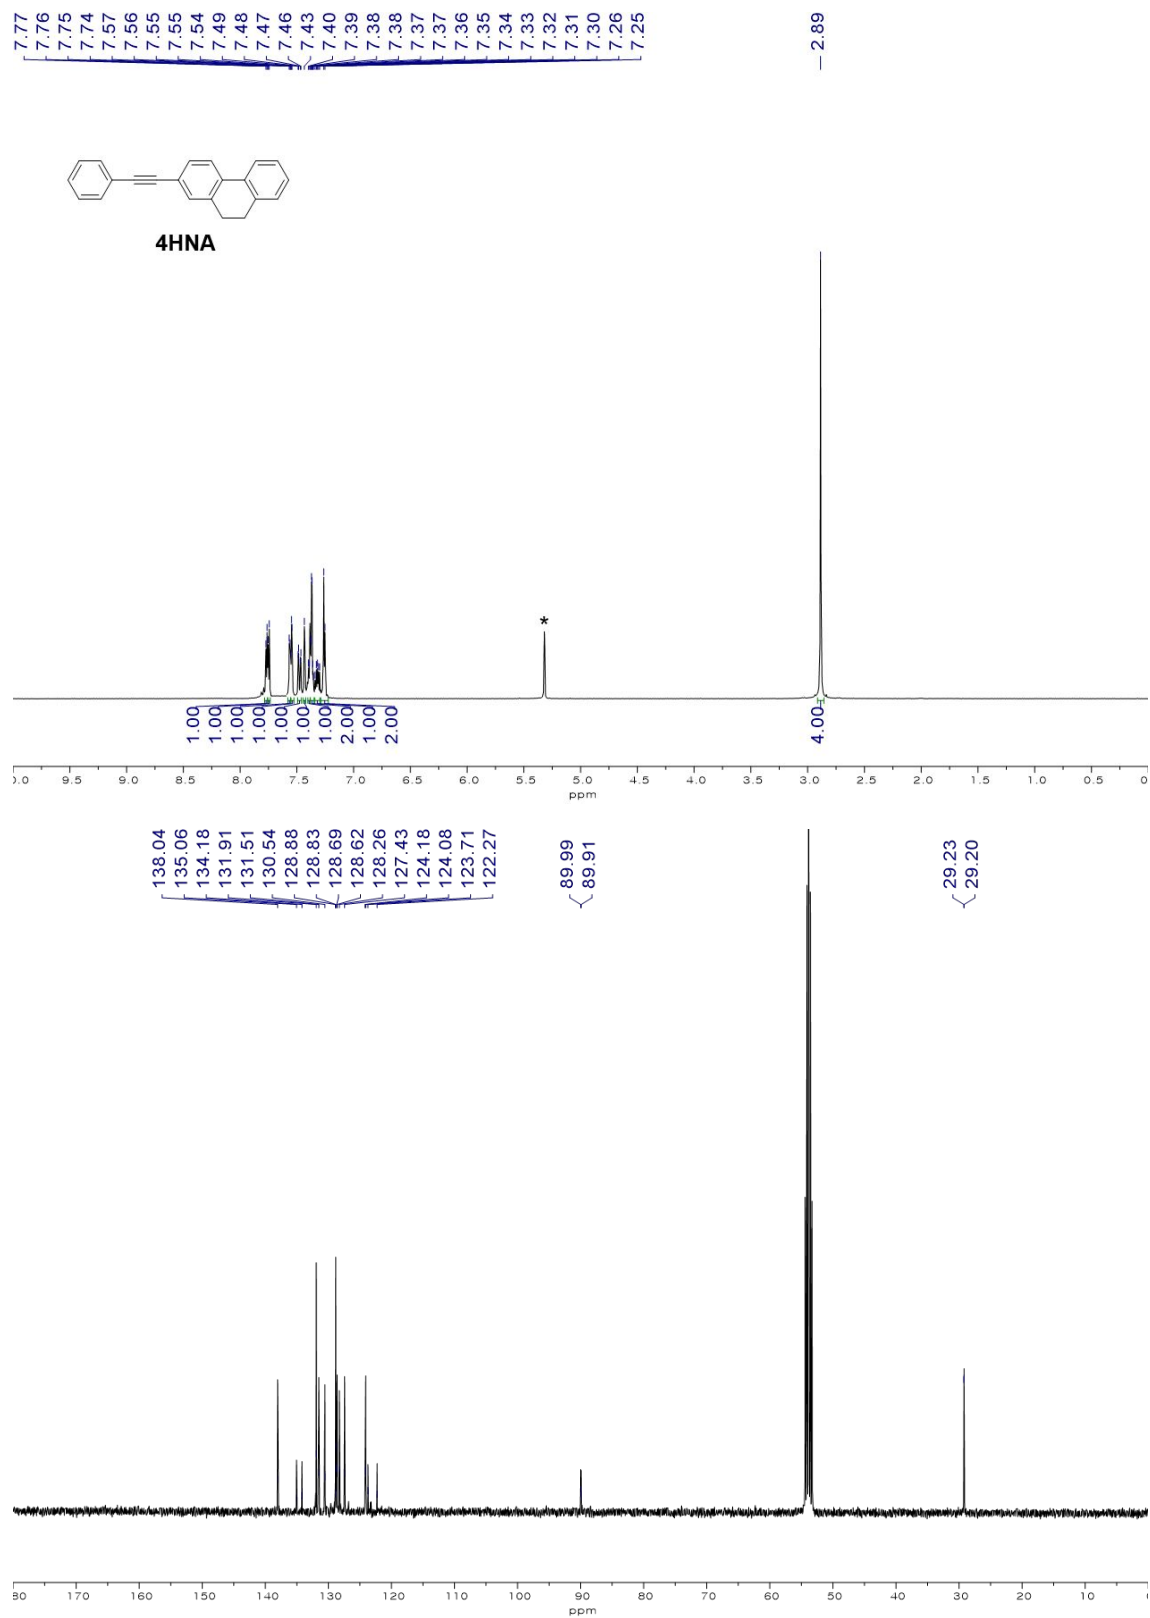

**Figure S5.** <sup>1</sup>H (top) and <sup>13</sup>C (bottom) NMR spectra of **4HNA** in CD<sub>2</sub>Cl<sub>2</sub> (\* from residual CH<sub>2</sub>Cl<sub>2</sub> in CD<sub>2</sub>Cl<sub>2</sub>).

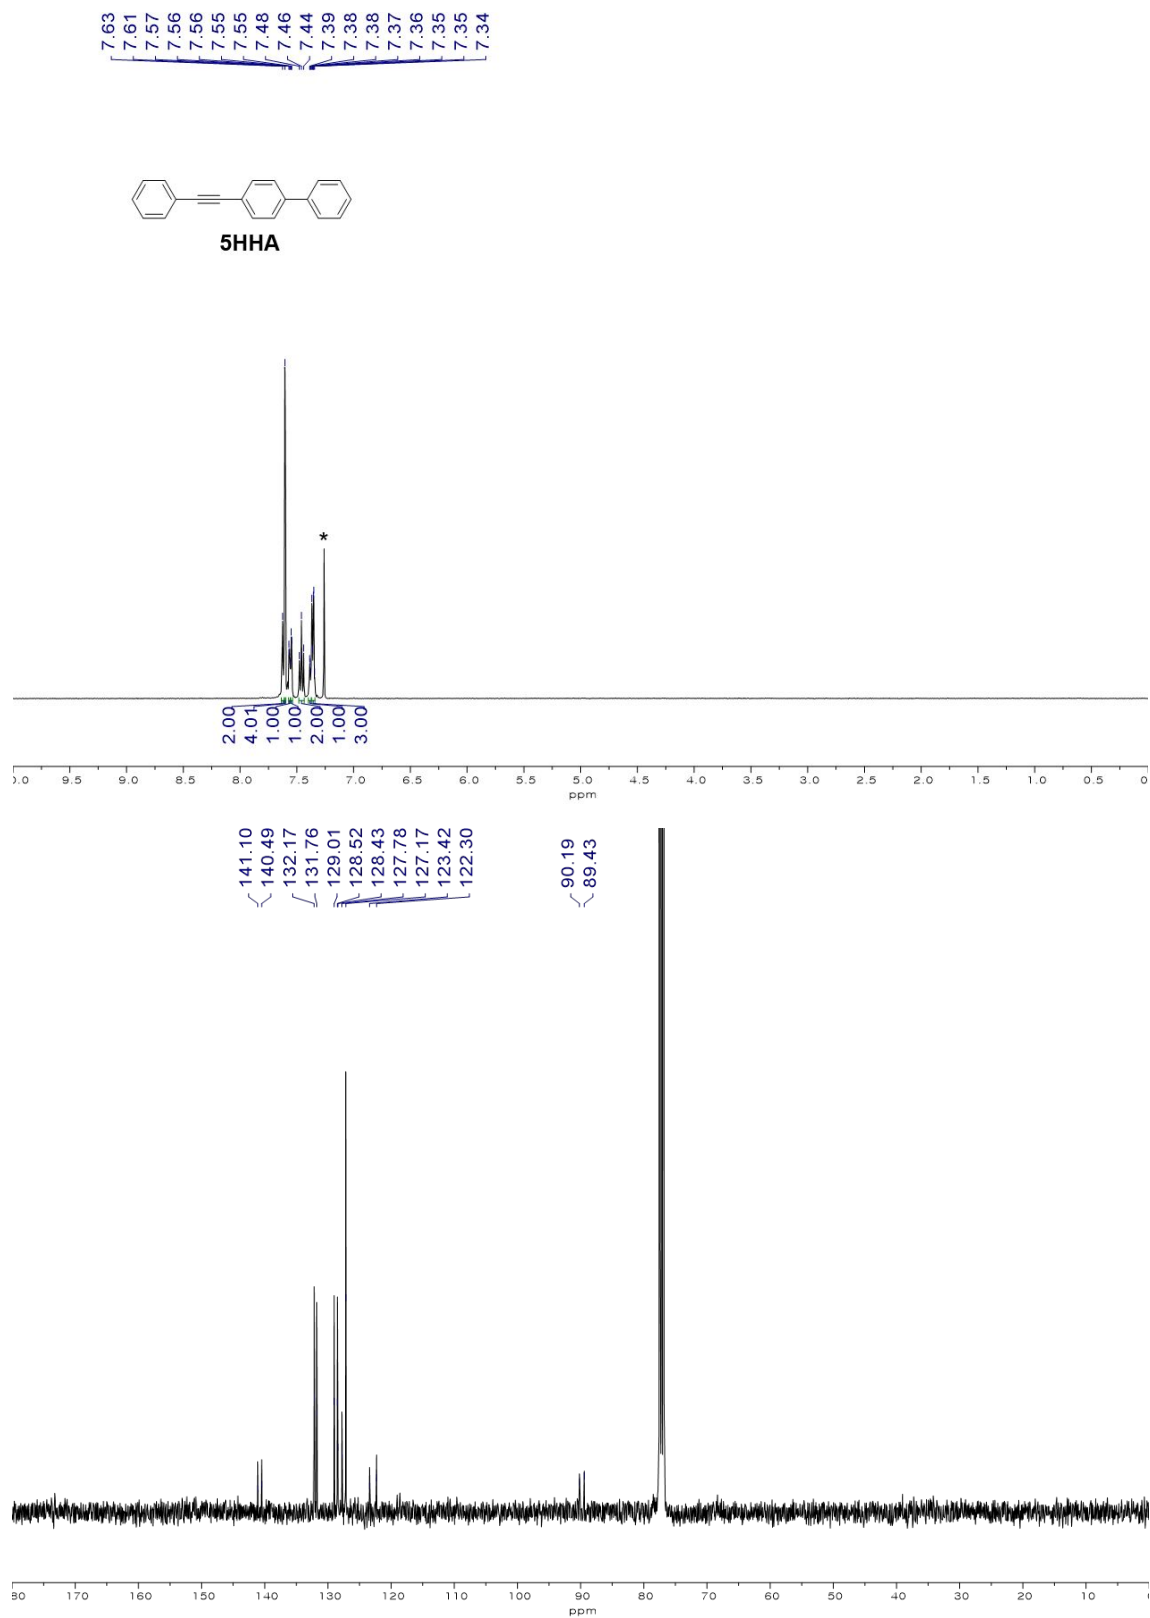

**Figure S6.** <sup>1</sup>H (top) and <sup>13</sup>C (bottom) NMR spectra of **5HHA** in CDCl<sub>3</sub> (\* from residual CHCl<sub>3</sub> in CDCl<sub>3</sub>).

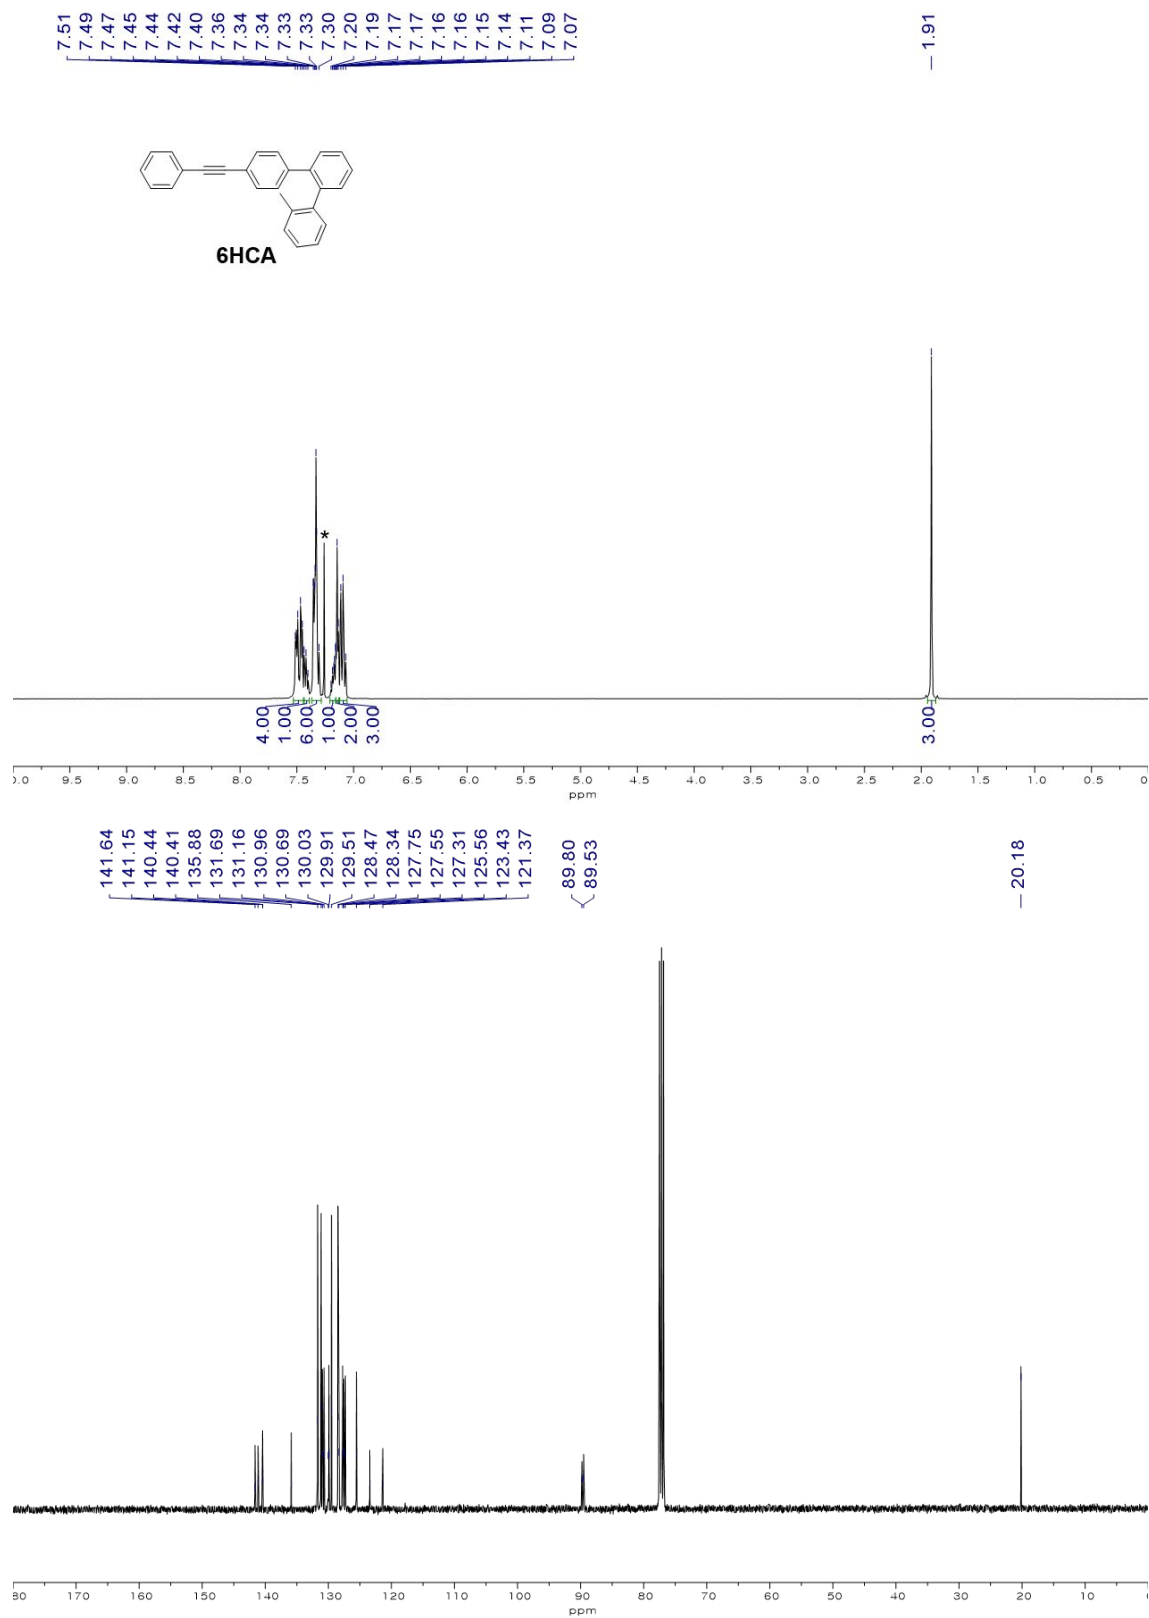

**Figure S7.** <sup>1</sup>H (top) and <sup>13</sup>C (bottom) NMR spectra of **6HCA** in CDCl<sub>3</sub> (\* from residual CHCl<sub>3</sub> in CDCl<sub>3</sub>).



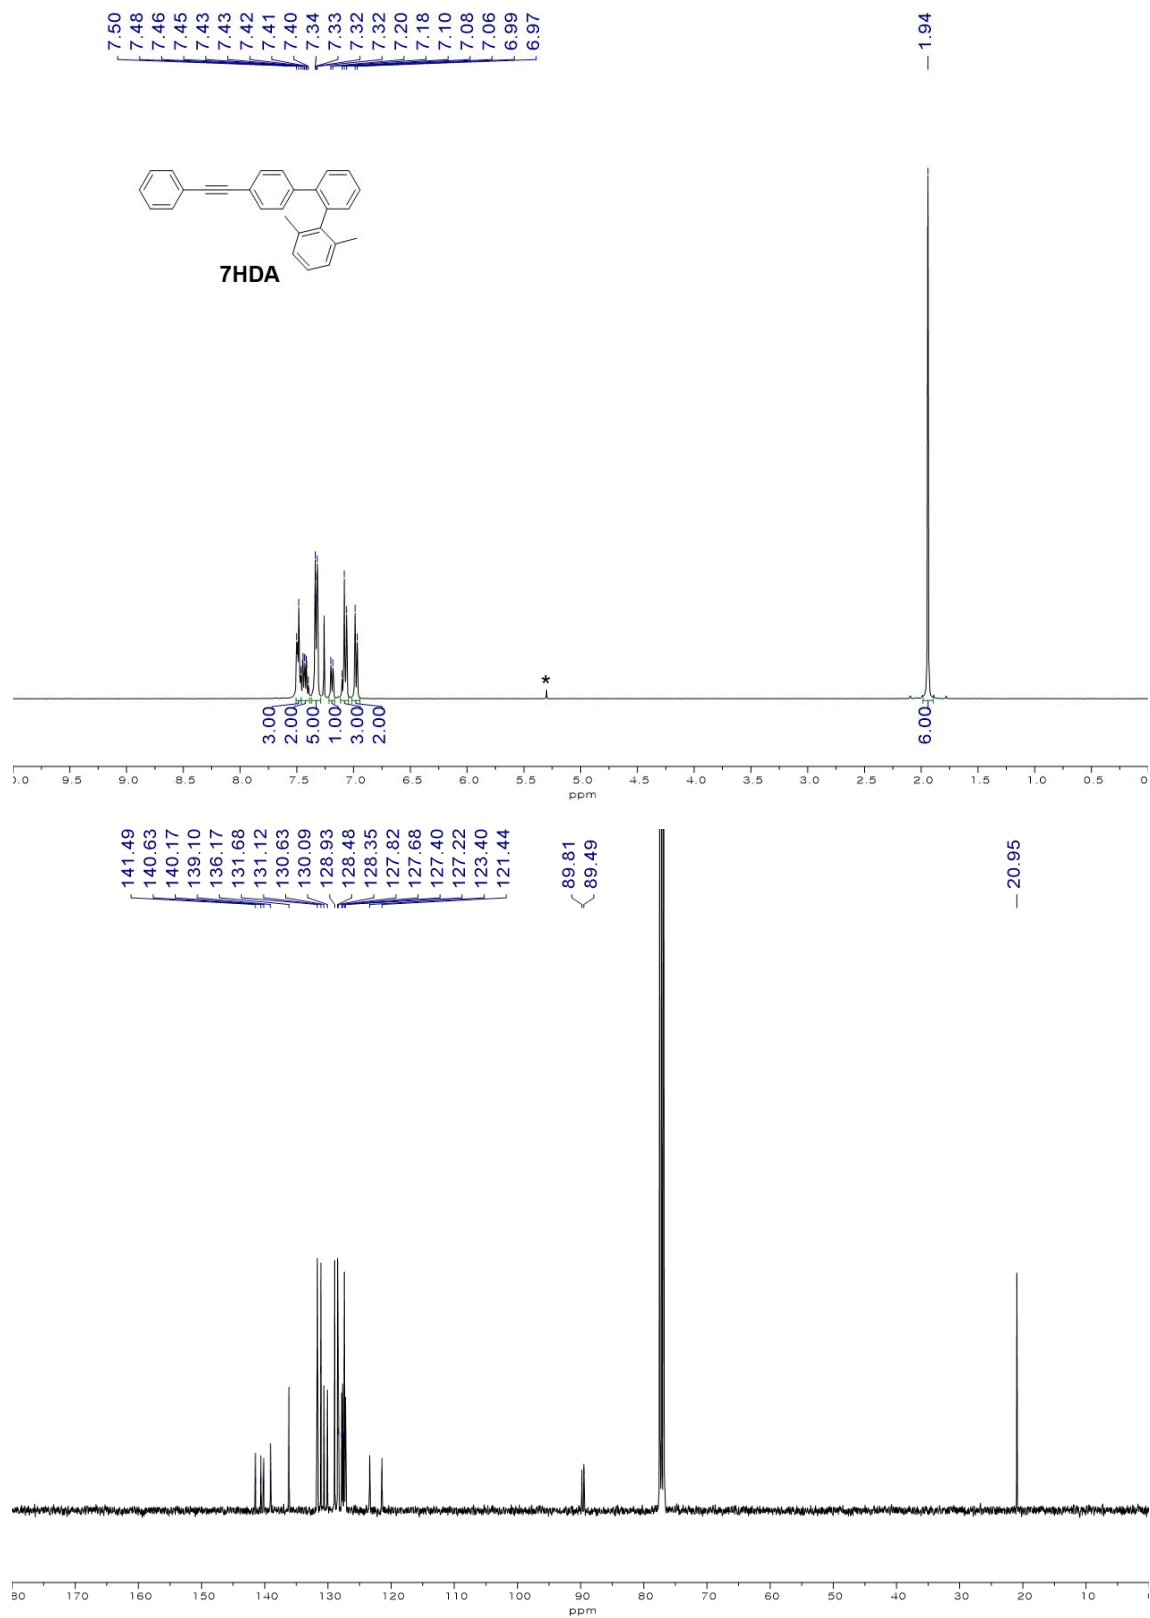

**Figure S8.** <sup>1</sup>H (top) and <sup>13</sup>C (bottom) NMR spectra of **7HDA** in CD<sub>2</sub>Cl<sub>2</sub> (\* from residual CH<sub>2</sub>Cl<sub>2</sub> in CD<sub>2</sub>Cl<sub>2</sub>).

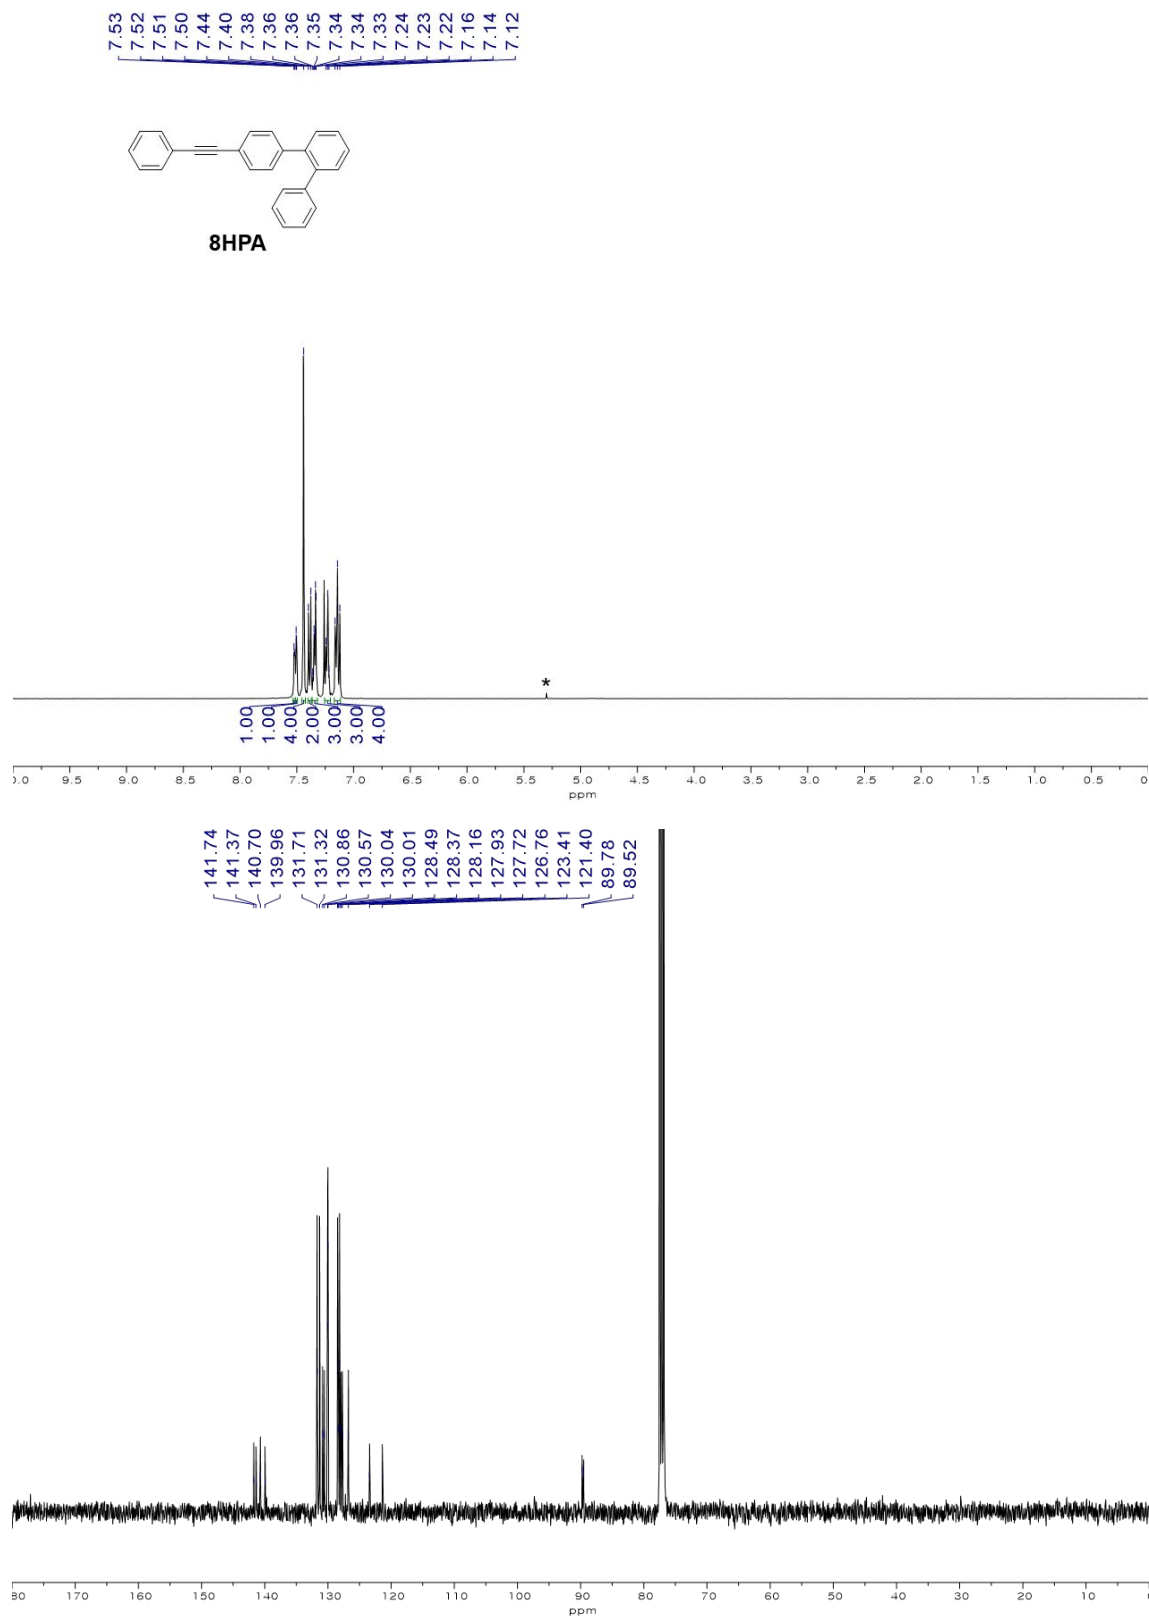

**Figure S9.** <sup>1</sup>H (top) and <sup>13</sup>C (bottom) NMR spectra of **8HPA** in CD<sub>2</sub>Cl<sub>2</sub> (\* from residual CH<sub>2</sub>Cl<sub>2</sub> in CD<sub>2</sub>Cl<sub>2</sub>).

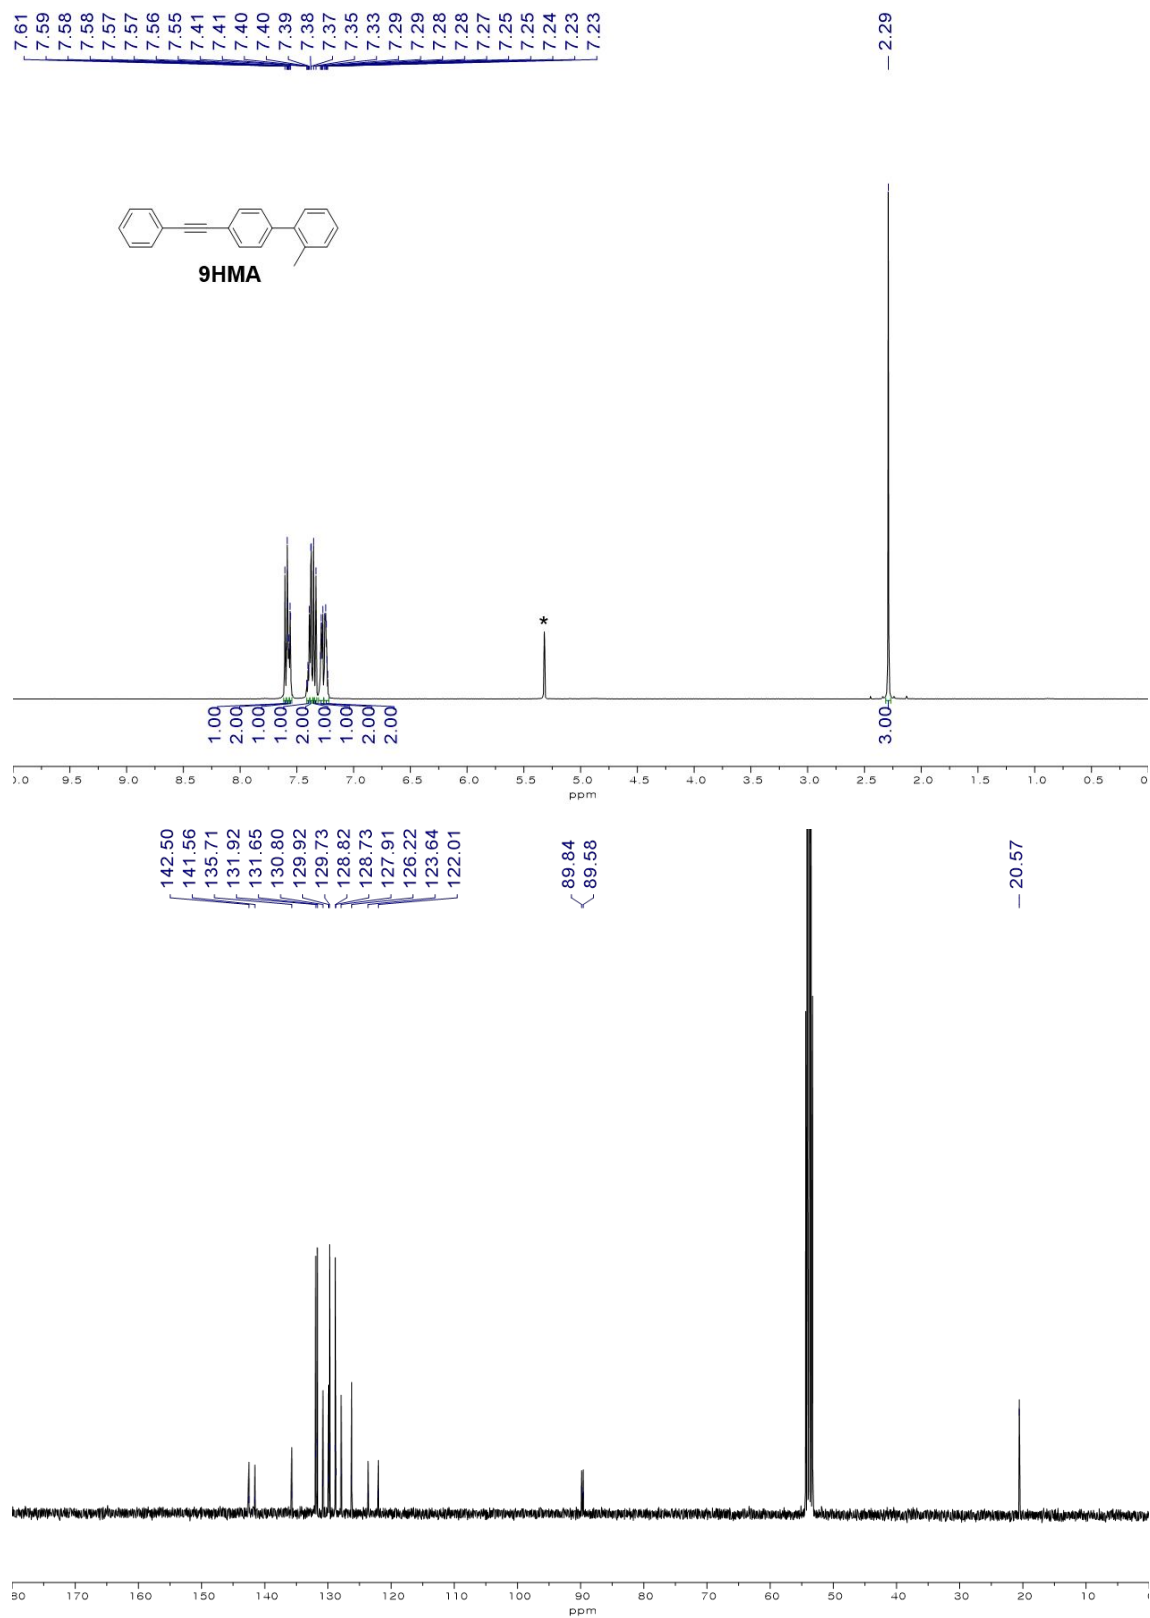

**Figure S10.** <sup>1</sup>H (top) and <sup>13</sup>C (bottom) NMR spectra of **9HMA** in CD<sub>2</sub>Cl<sub>2</sub> (\* from residual CH<sub>2</sub>Cl<sub>2</sub> in CD<sub>2</sub>Cl<sub>2</sub>).

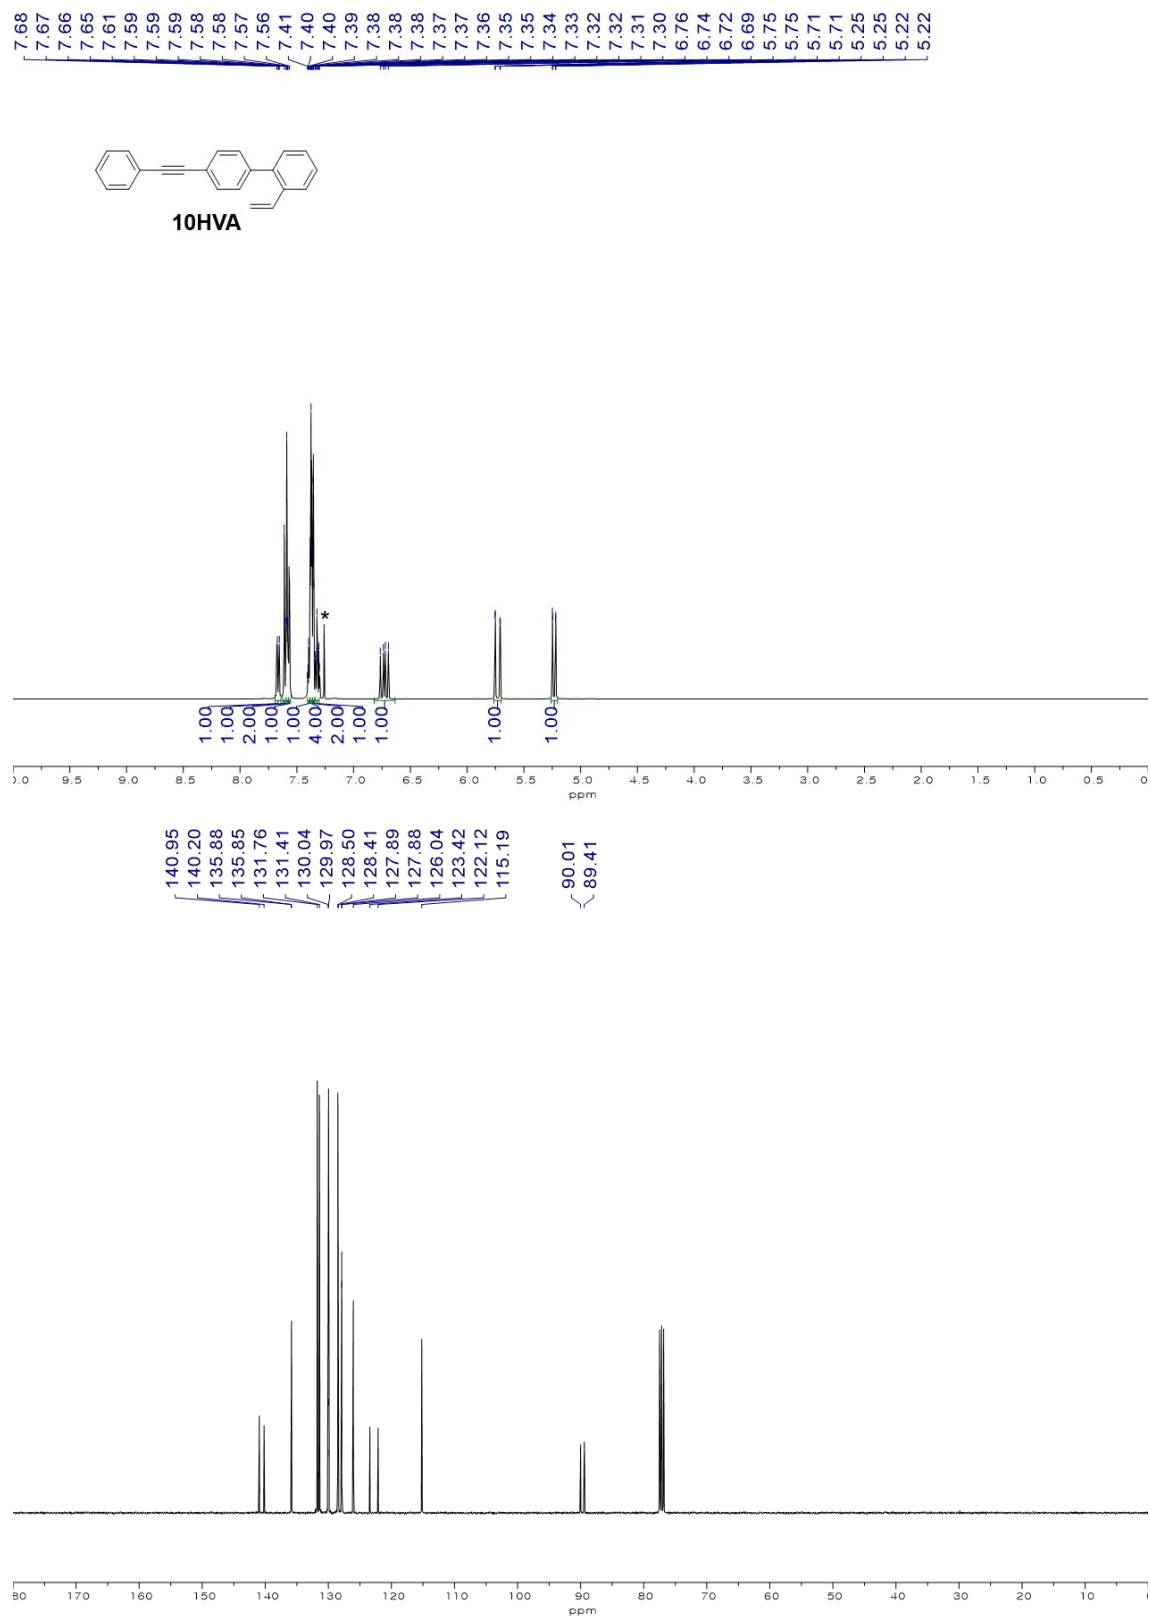

**Figure S11.** <sup>1</sup>H (top) and <sup>13</sup>C (bottom) NMR spectra of **10HVA** in CDCl<sub>3</sub> (\* from residual CHCl<sub>3</sub> in CDCl<sub>3</sub>).

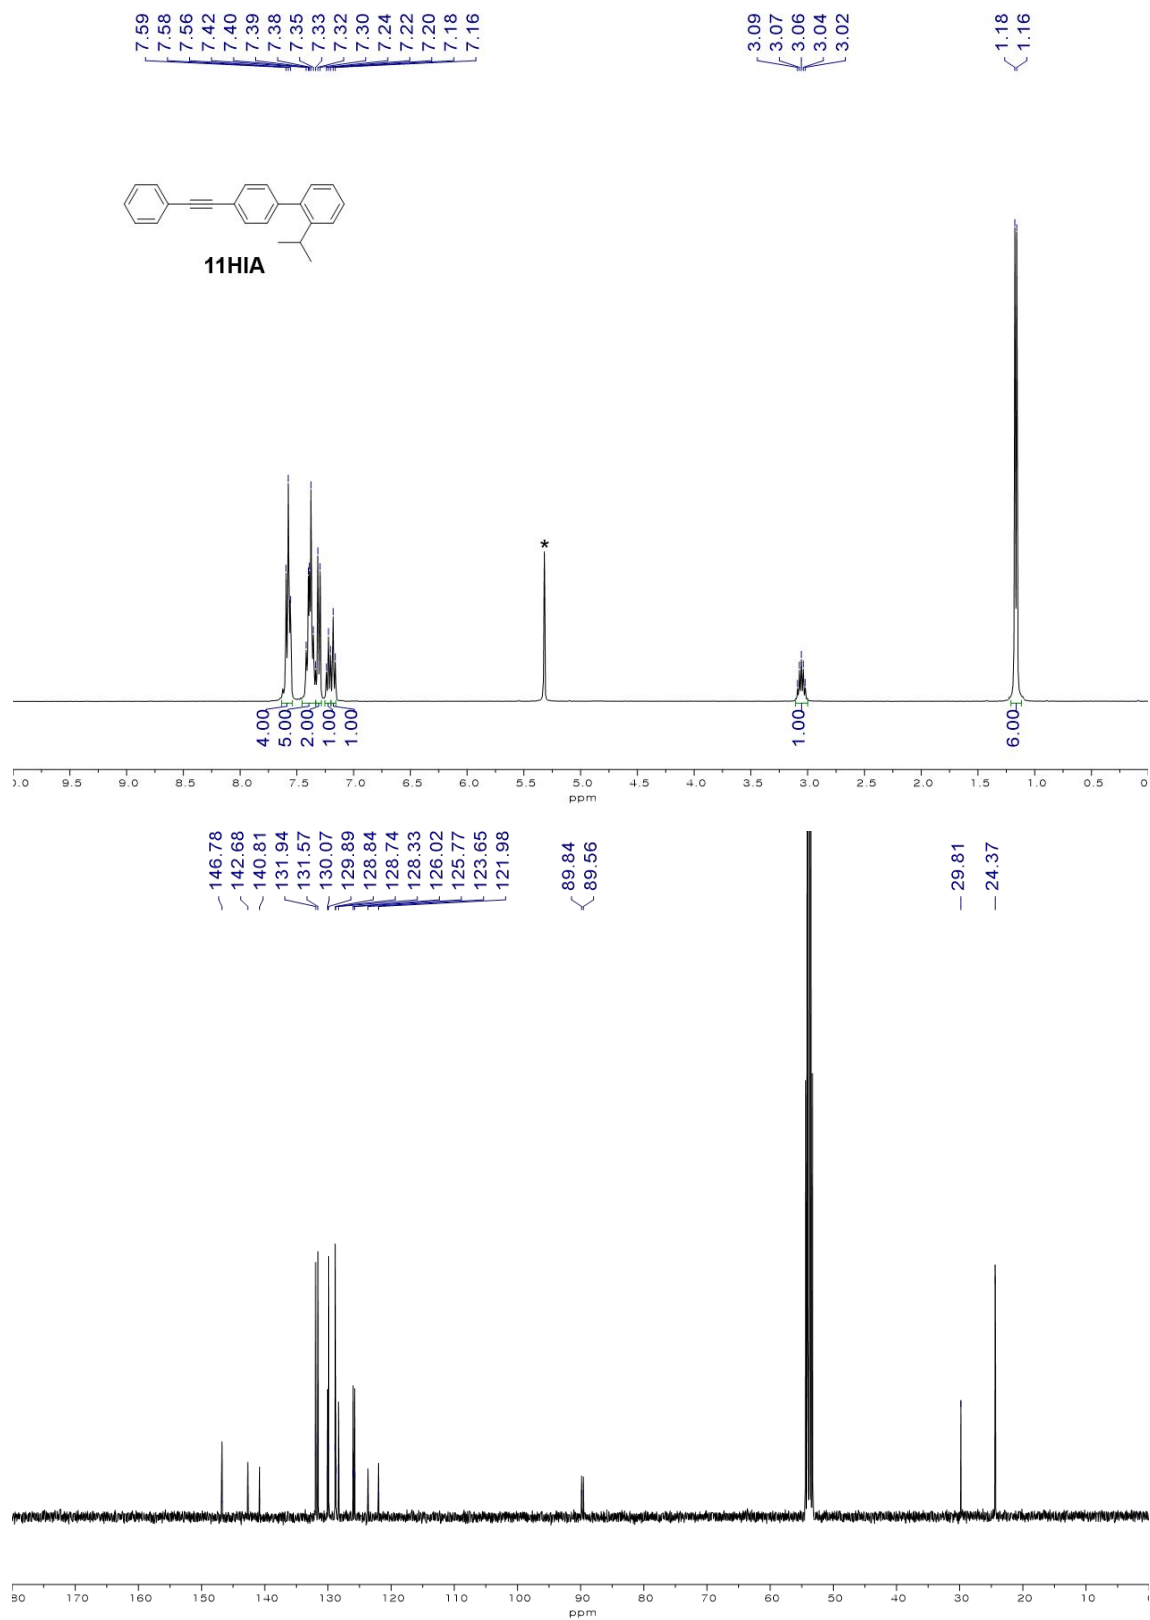

**Figure S12.**  $^1\text{H}$  (top) and  $^{13}\text{C}$  (bottom) NMR spectra of **11HIA** in  $\text{CD}_2\text{Cl}_2$  (\* from residual  $\text{CH}_2\text{Cl}_2$  in  $\text{CD}_2\text{Cl}_2$ ).

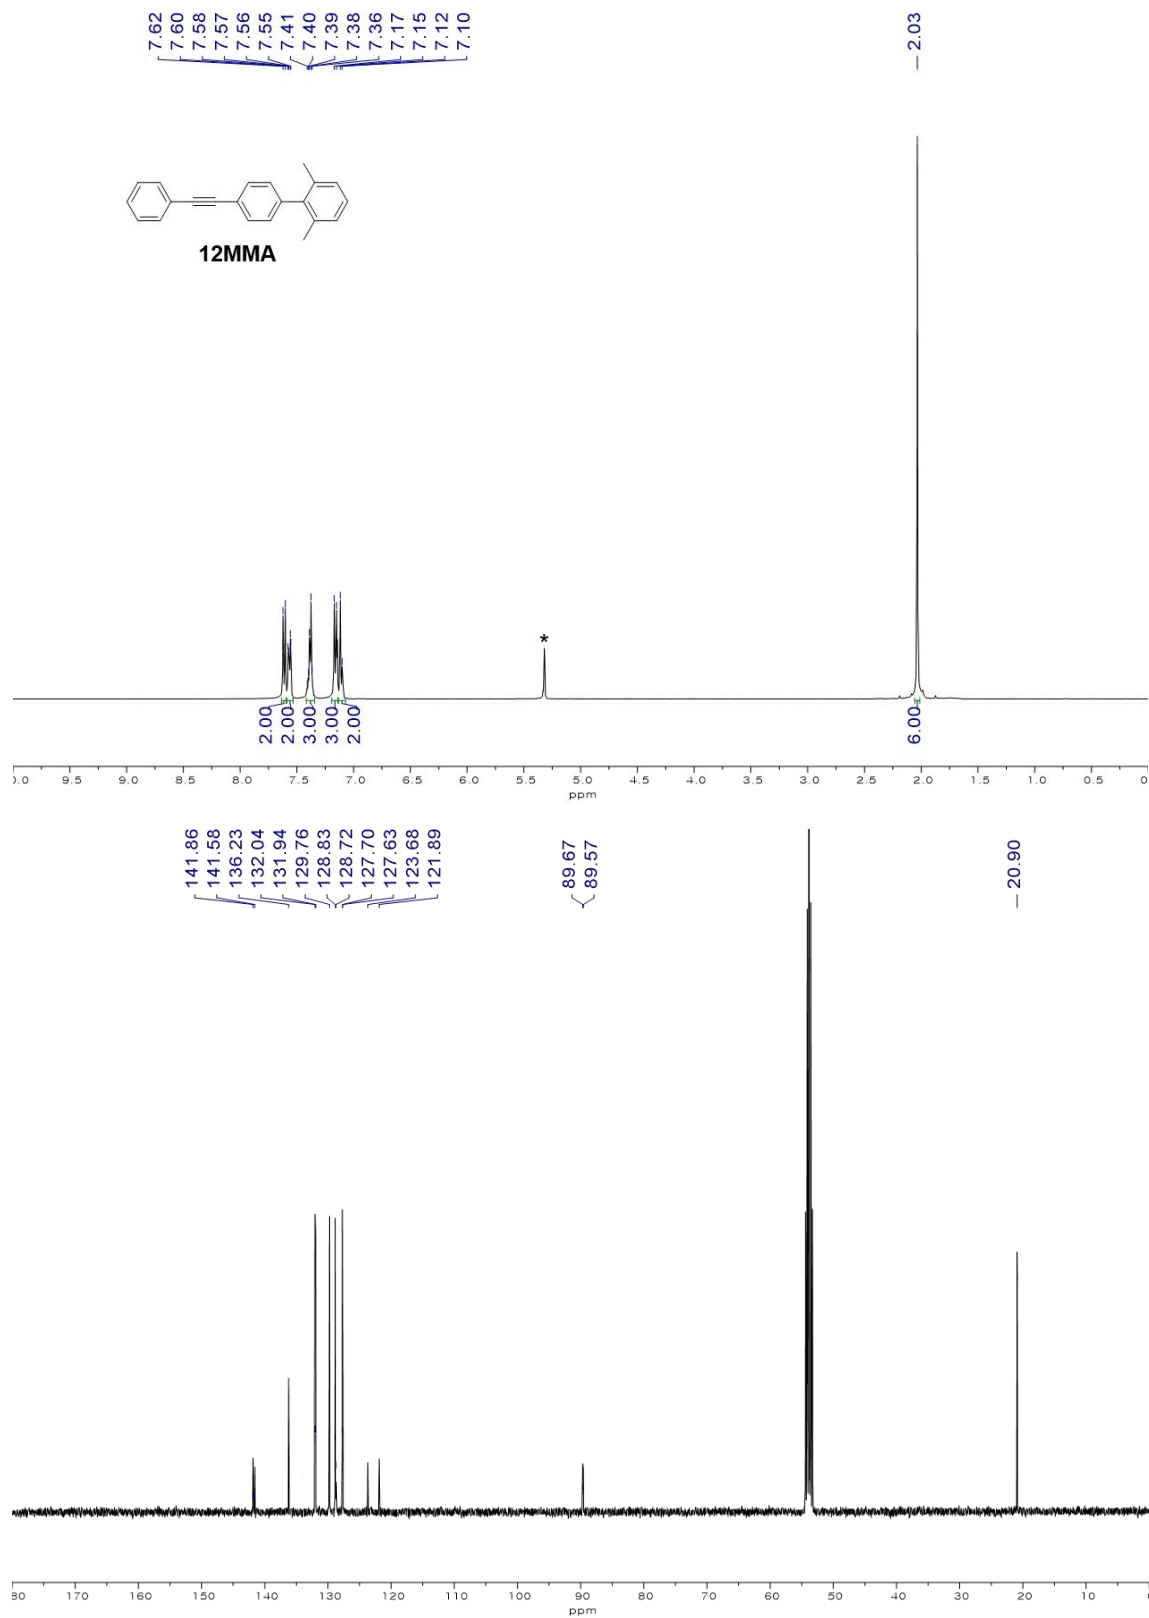

**Figure S13.** <sup>1</sup>H (top) and <sup>13</sup>C (bottom) NMR spectra of **12MMA** in CD<sub>2</sub>Cl<sub>2</sub> (\* from residual CH<sub>2</sub>Cl<sub>2</sub> in CD<sub>2</sub>Cl<sub>2</sub>).

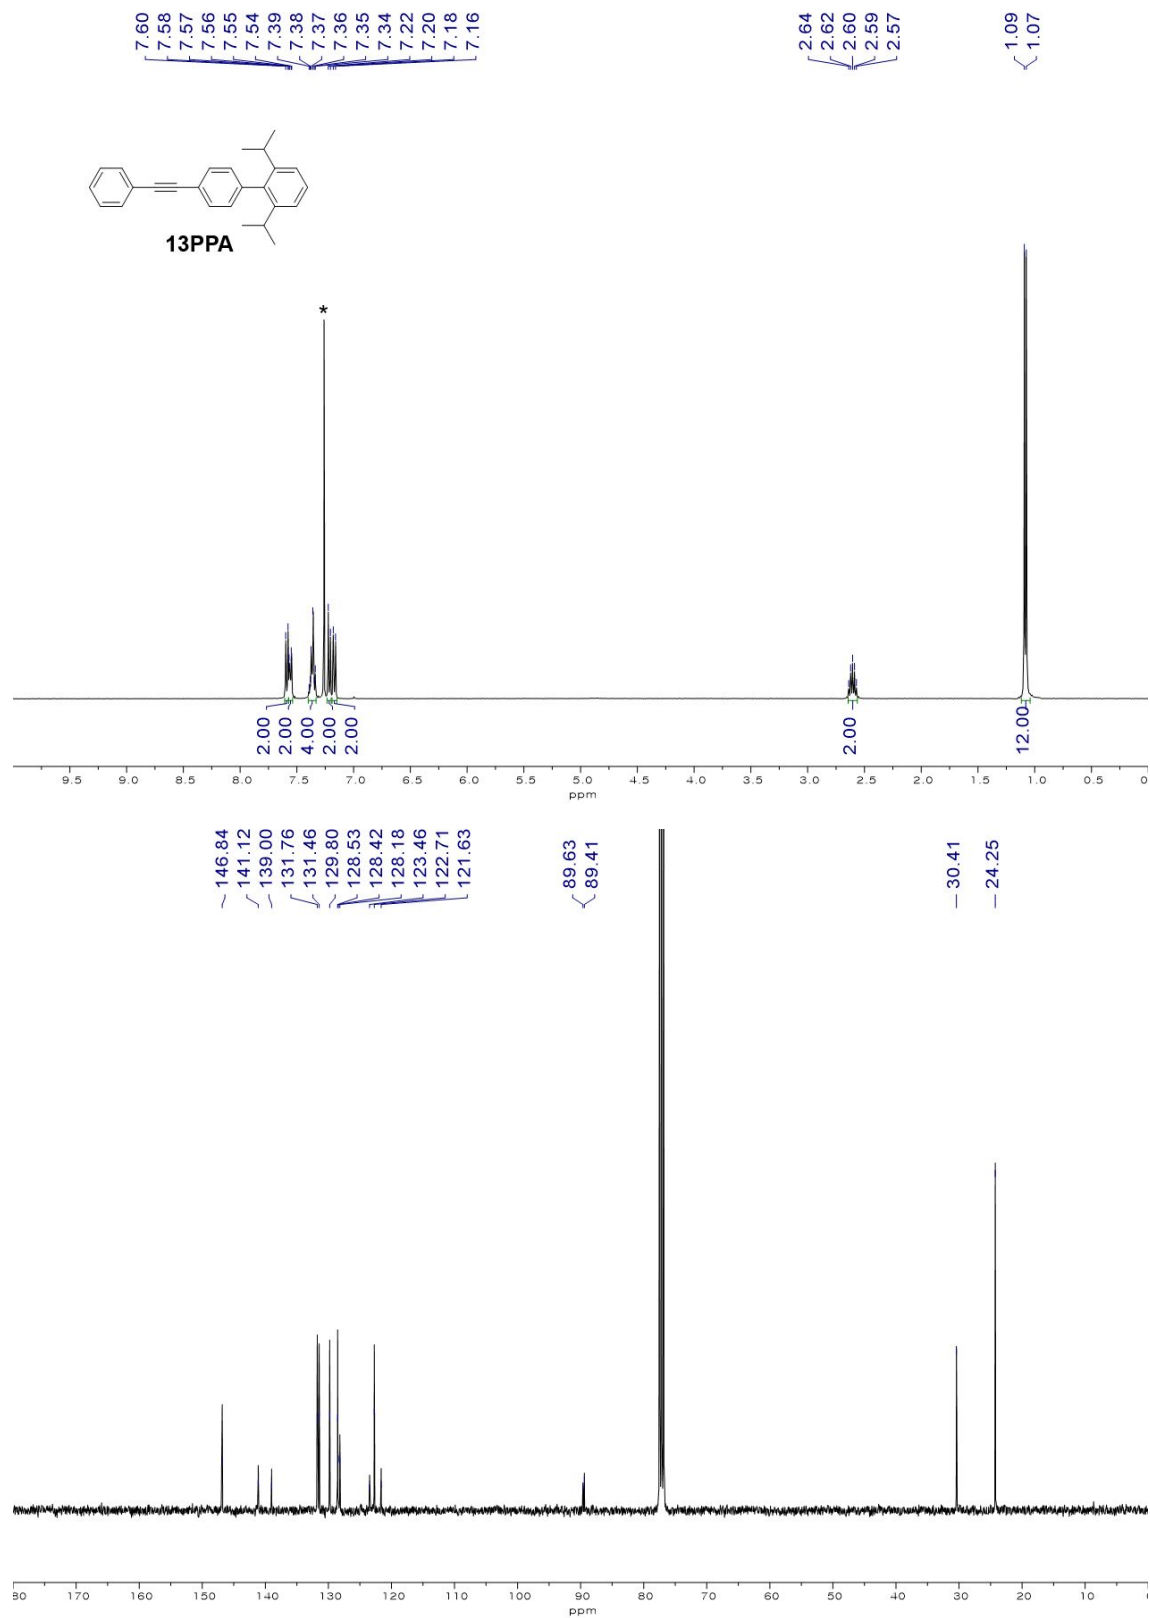

**Figure S14.** <sup>1</sup>H (top) and <sup>13</sup>C (bottom) NMR spectra of **13PPA** in CDCl<sub>3</sub> (\* from residual CHCl<sub>3</sub> in CDCl<sub>3</sub>).





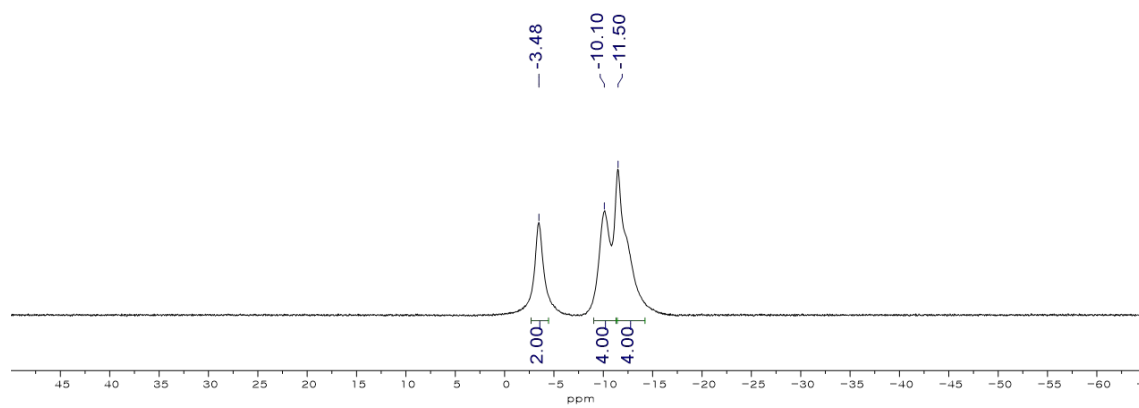

**Figure S16.**  $^{11}\text{B}\{^1\text{H}\}$  NMR spectra of **1HF** in  $\text{CDCl}_3$ .

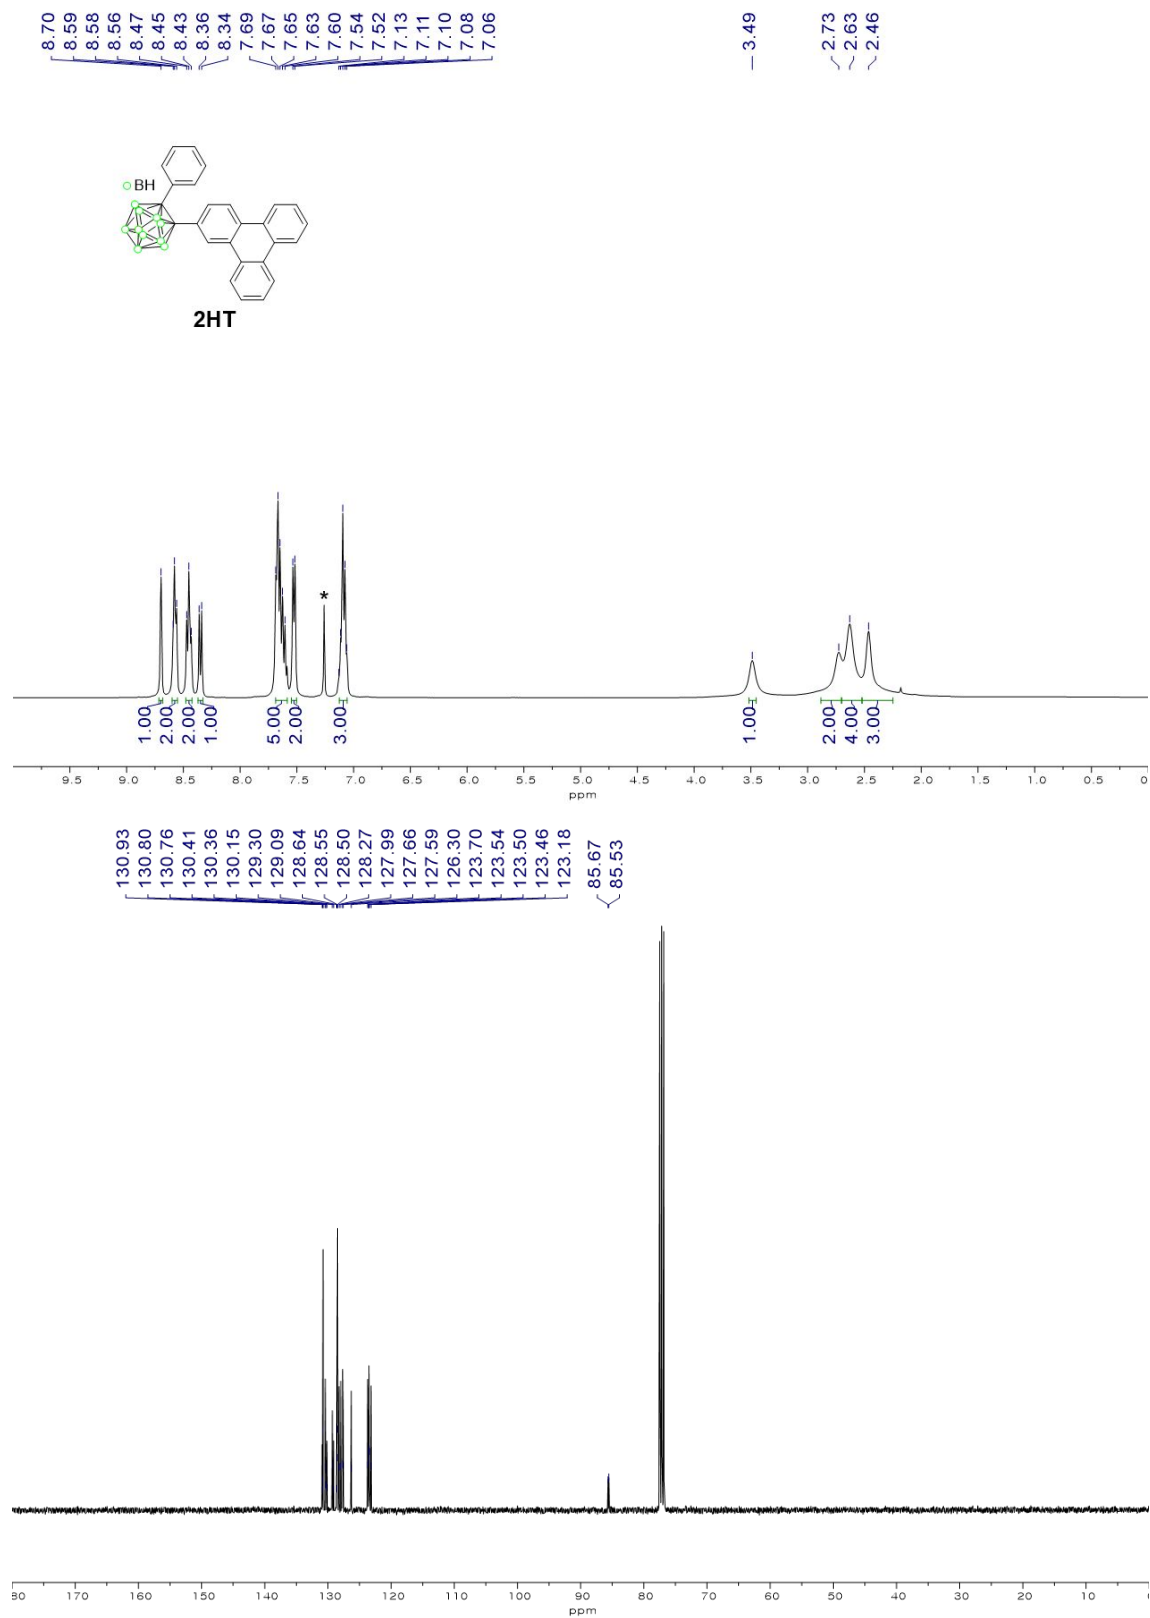

**Figure S17.**  $^1\text{H}\{^{11}\text{B}\}$  (top) and  $^{13}\text{C}$  (bottom) NMR spectra of **2HT** in  $\text{CDCl}_3$  (\* from residual  $\text{CHCl}_3$  in  $\text{CDCl}_3$ ).

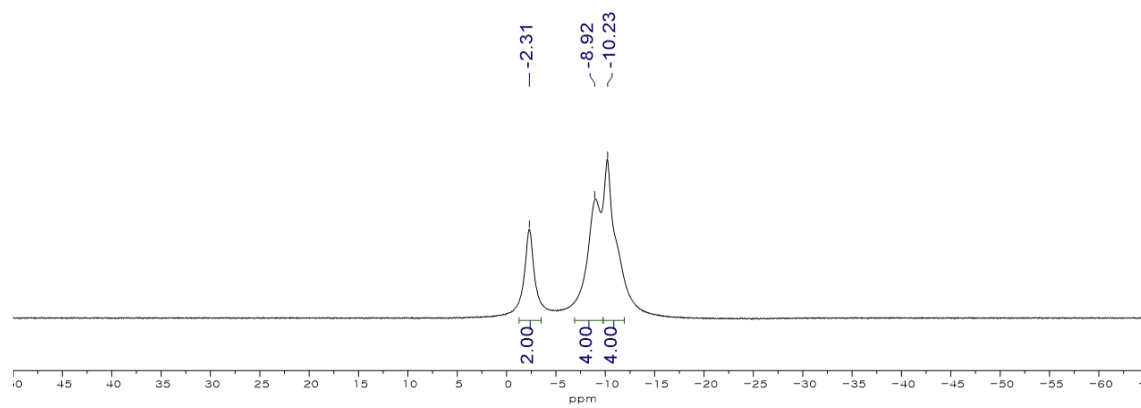

**Figure S18.**  $^{11}\text{B}\{^1\text{H}\}$  NMR spectra of **2HT** in  $\text{CDCl}_3$ .

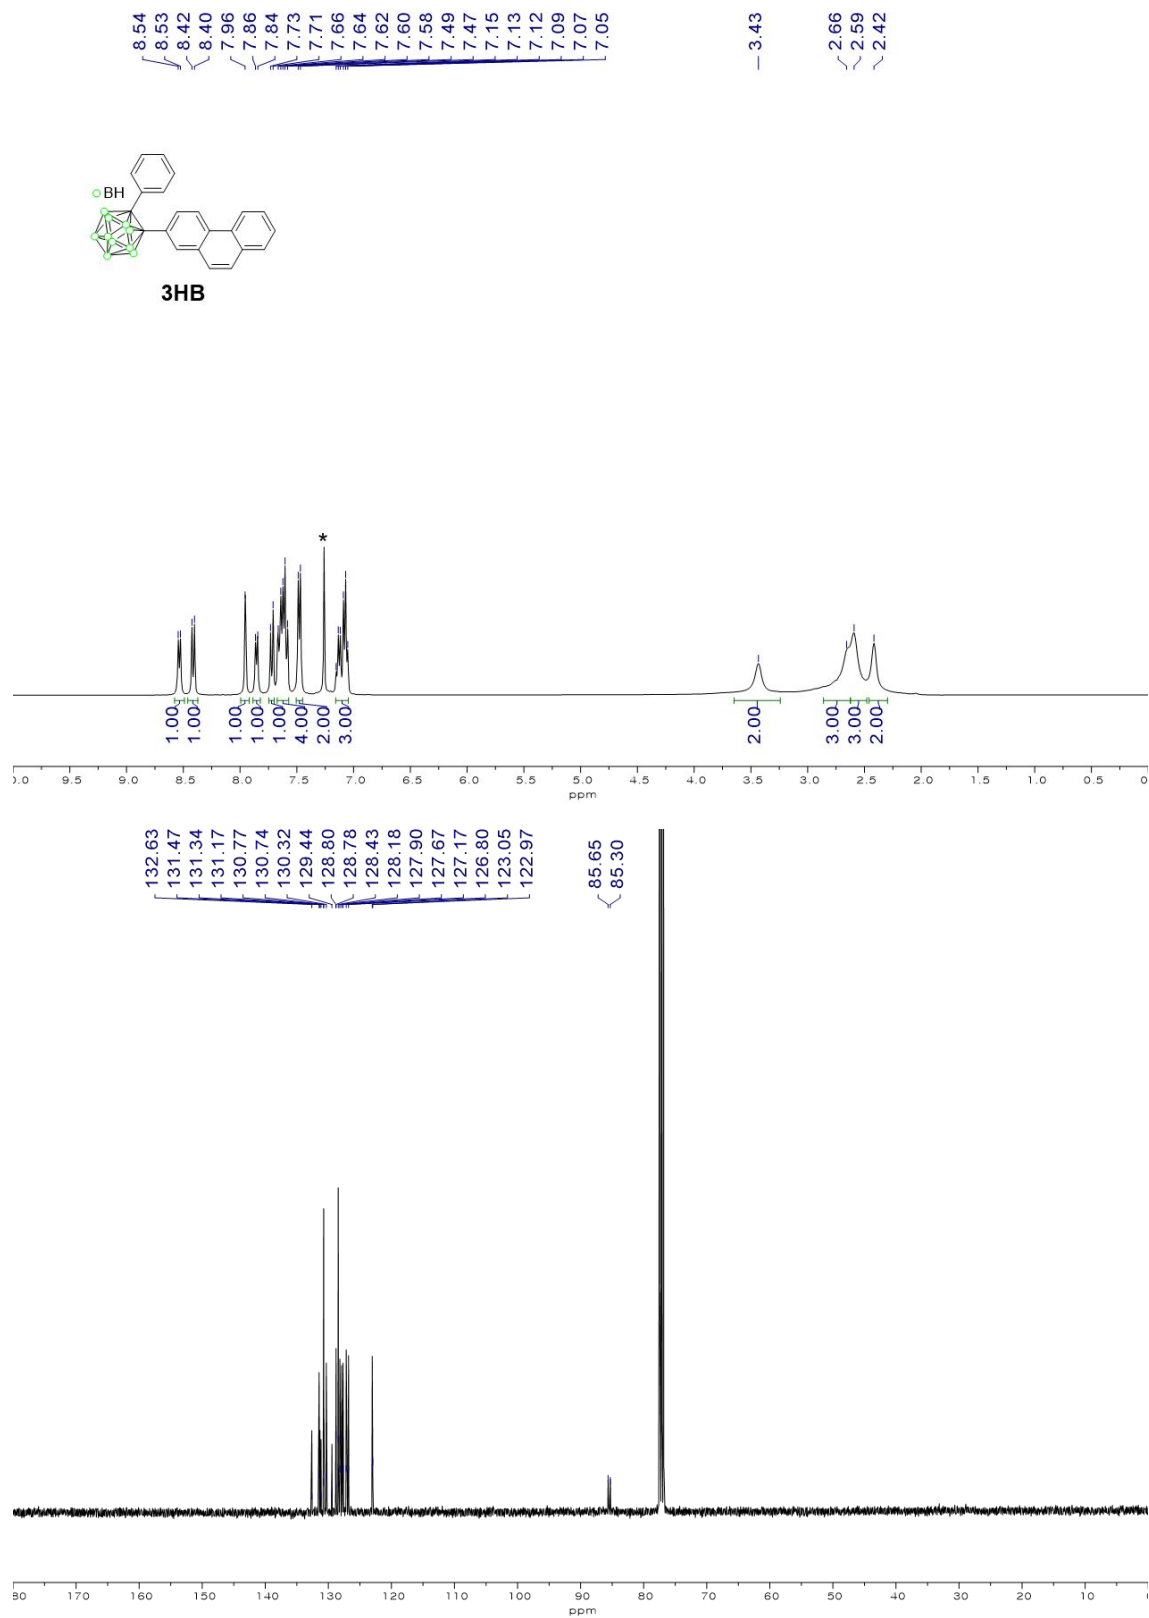

**Figure S19.**  $^1\text{H}\{^{11}\text{B}\}$  (top) and  $^{13}\text{C}$  (bottom) NMR spectra of **3HB** in  $\text{CDCl}_3$  (\* from residual  $\text{CHCl}_3$  in  $\text{CDCl}_3$ ).

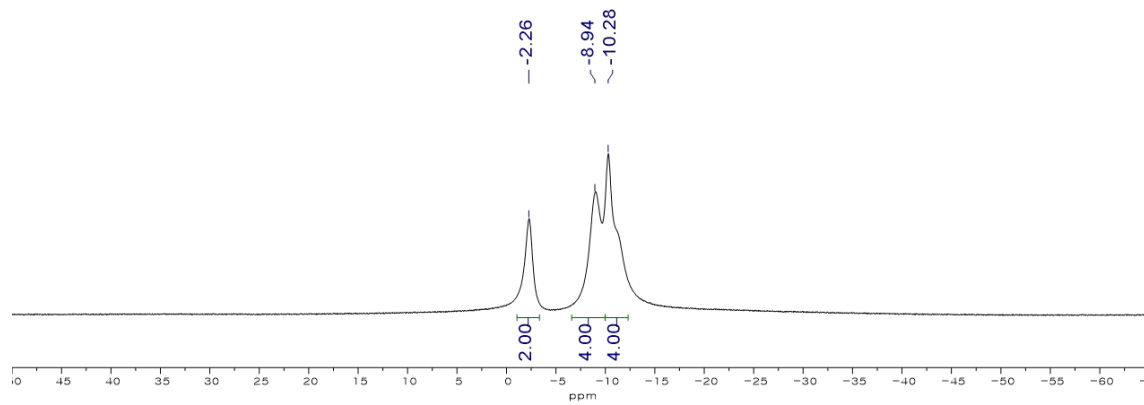

**Figure S20.**  $^{11}\text{B}\{^1\text{H}\}$  NMR spectra of **3HB** in  $\text{CDCl}_3$ .

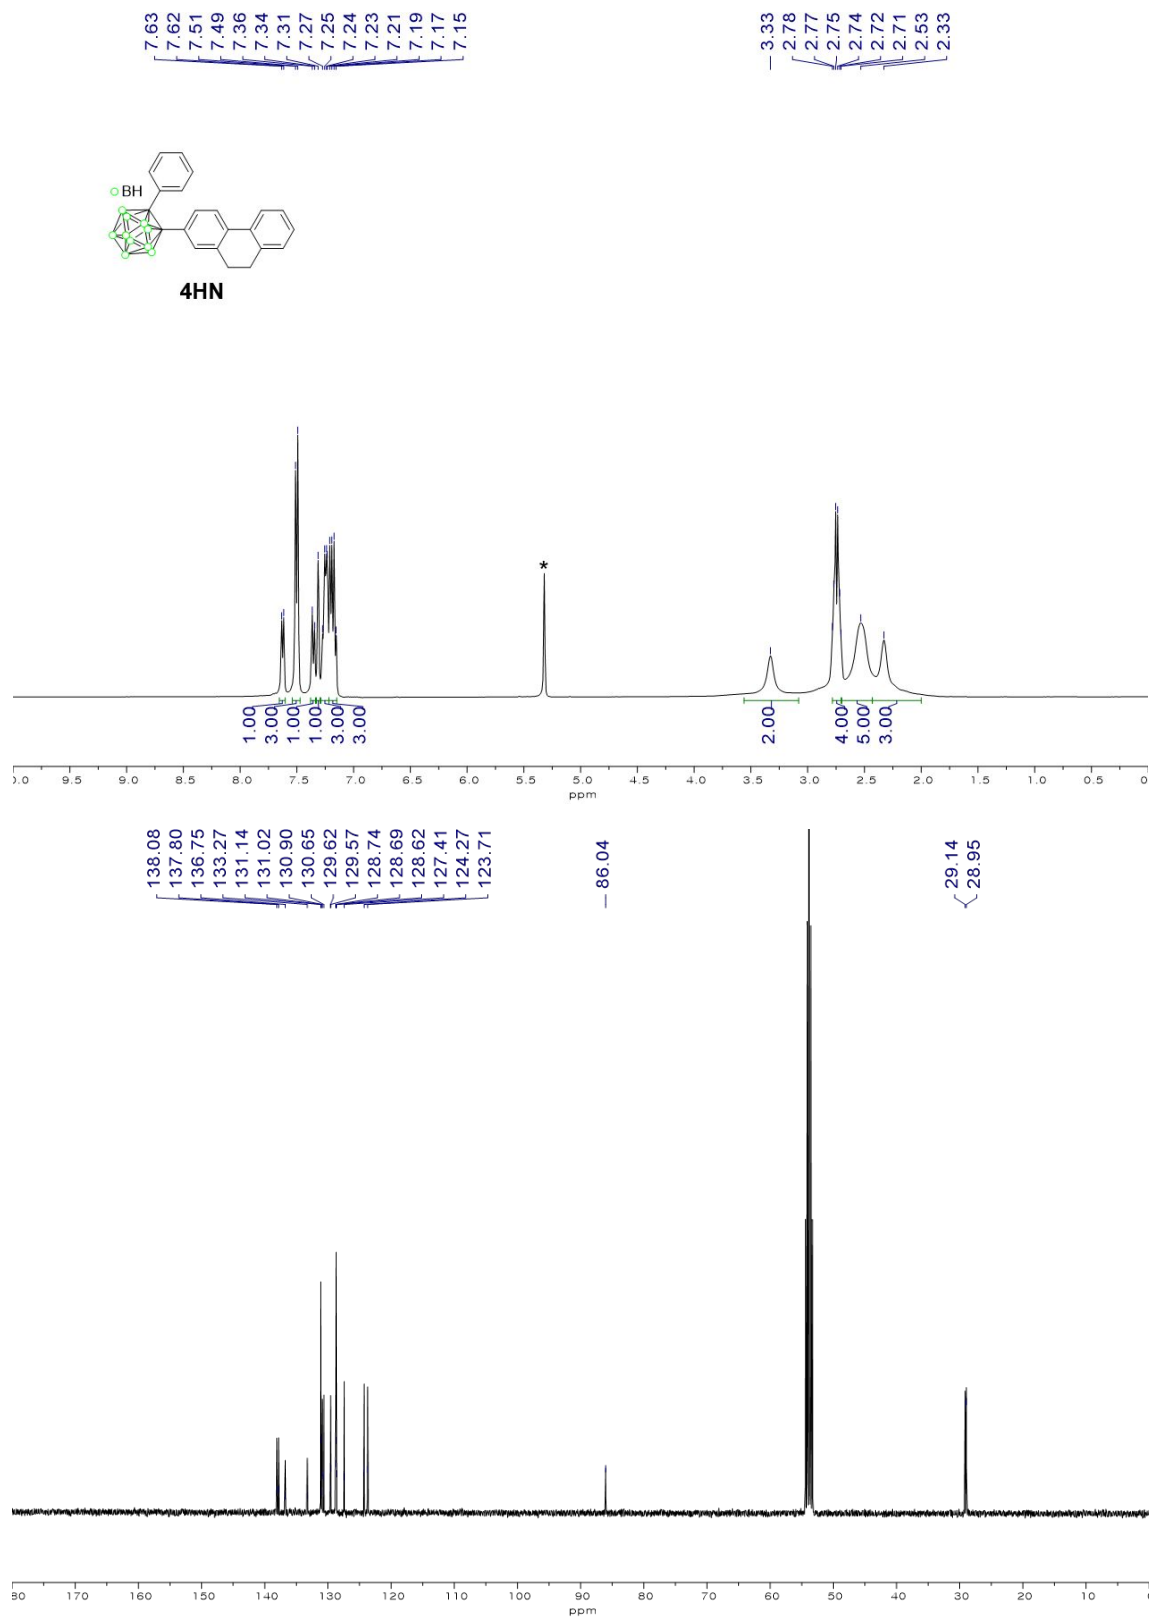

**Figure S21.**  $^1\text{H}\{^{11}\text{B}\}$  (top) and  $^{13}\text{C}$  (bottom) NMR spectra of **4HN** in  $\text{CD}_2\text{Cl}_2$  (\* from residual  $\text{CH}_2\text{Cl}_2$  in  $\text{CD}_2\text{Cl}_2$ ).

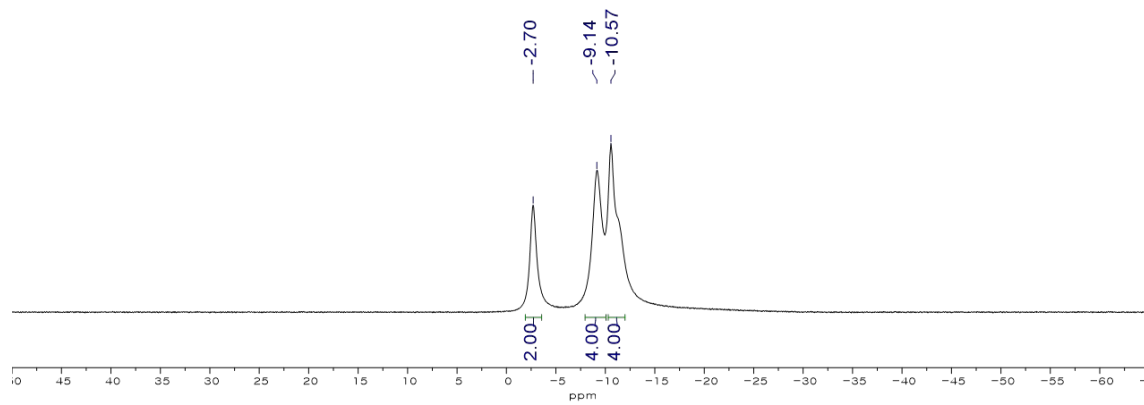

**Figure S22.**  $^{11}\text{B}\{^1\text{H}\}$  NMR spectra of 4HN in  $\text{CD}_2\text{Cl}_2$ .

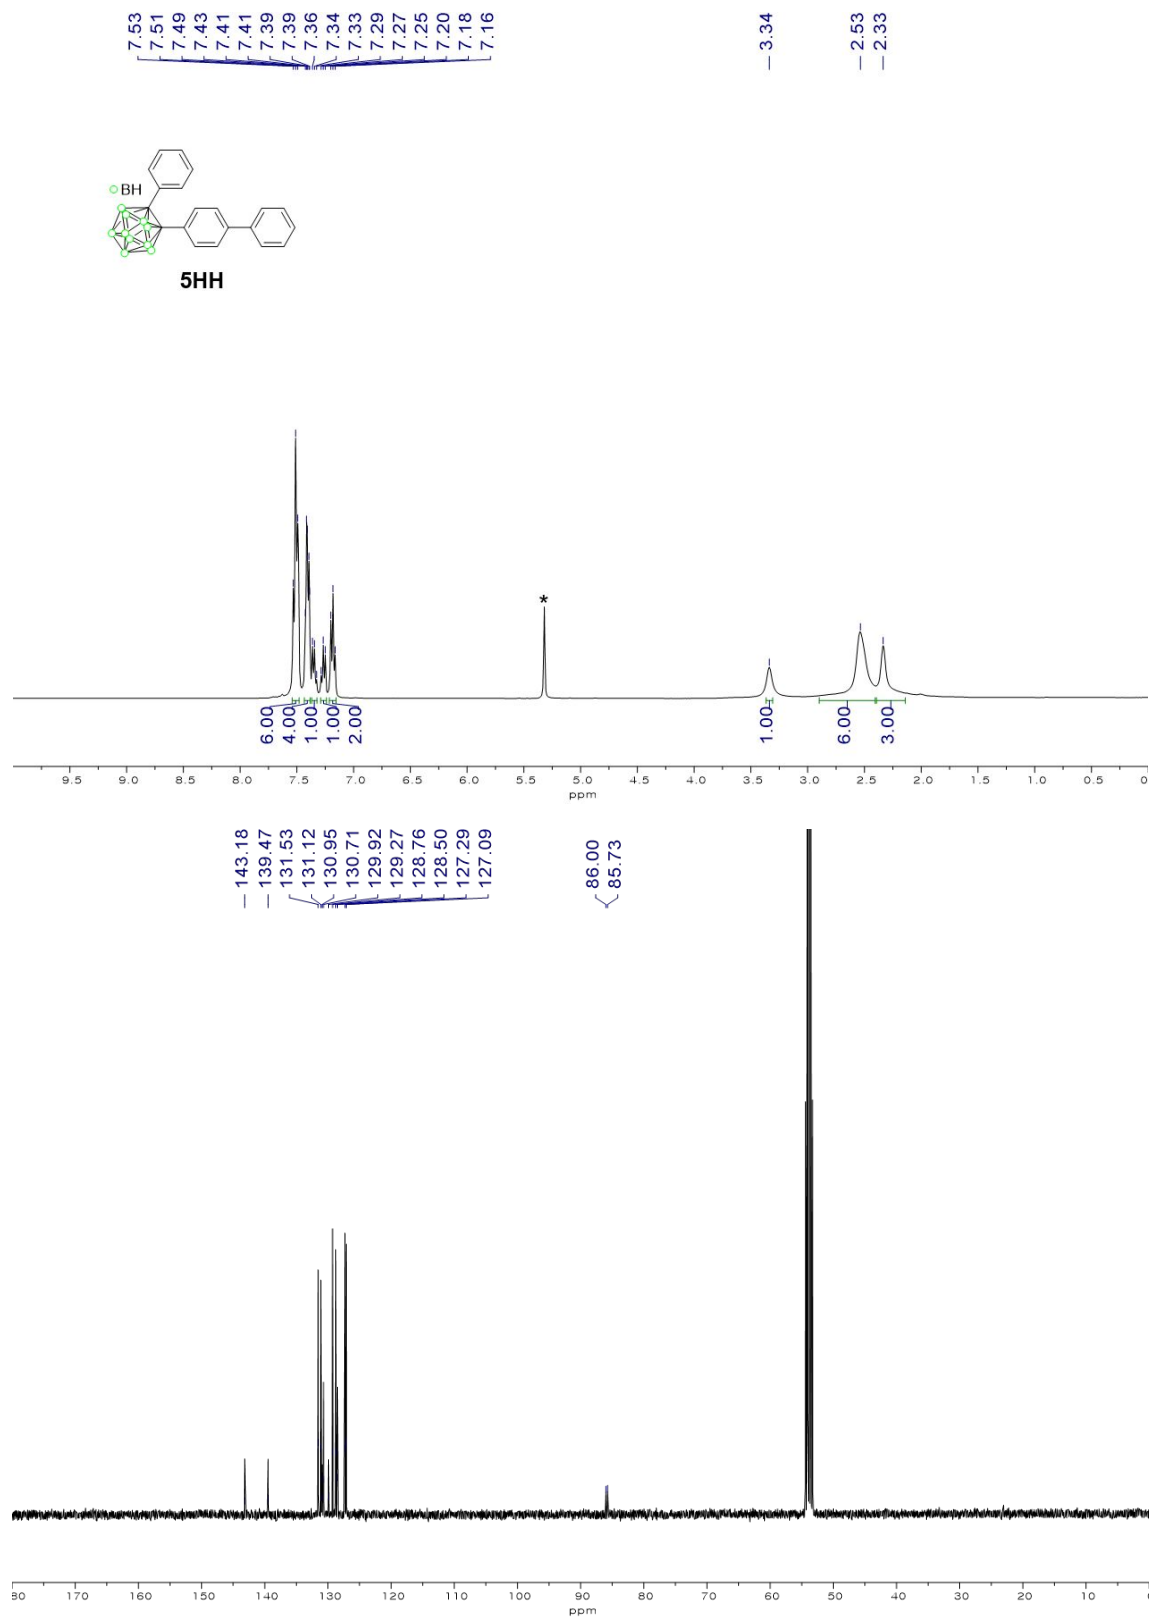

**Figure S23.**  $^1\text{H}\{^{11}\text{B}\}$  (top) and  $^{13}\text{C}$  (bottom) NMR spectra of **5HH** in  $\text{CD}_2\text{Cl}_2$  (\* from residual  $\text{CH}_2\text{Cl}_2$  in  $\text{CD}_2\text{Cl}_2$ ).



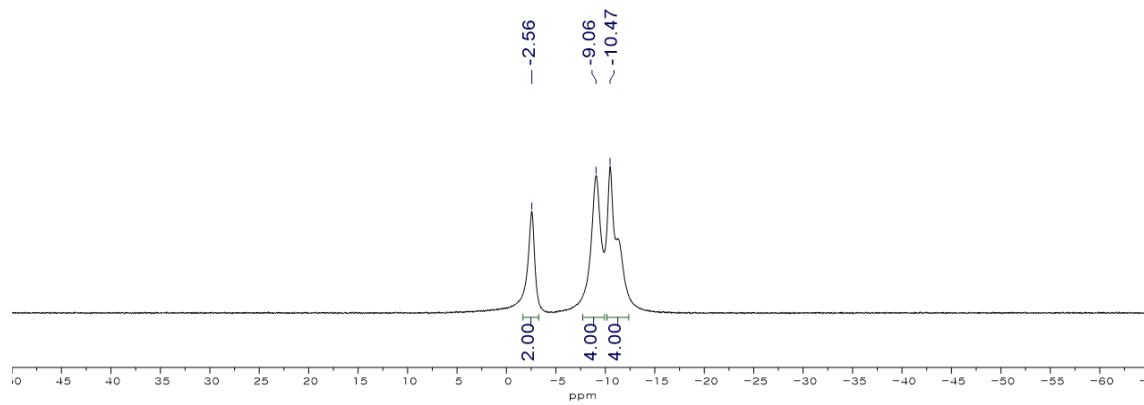

**Figure S24.**  $^{11}\text{B}\{^1\text{H}\}$  NMR spectra of **5HH** in  $\text{CD}_2\text{Cl}_2$ .

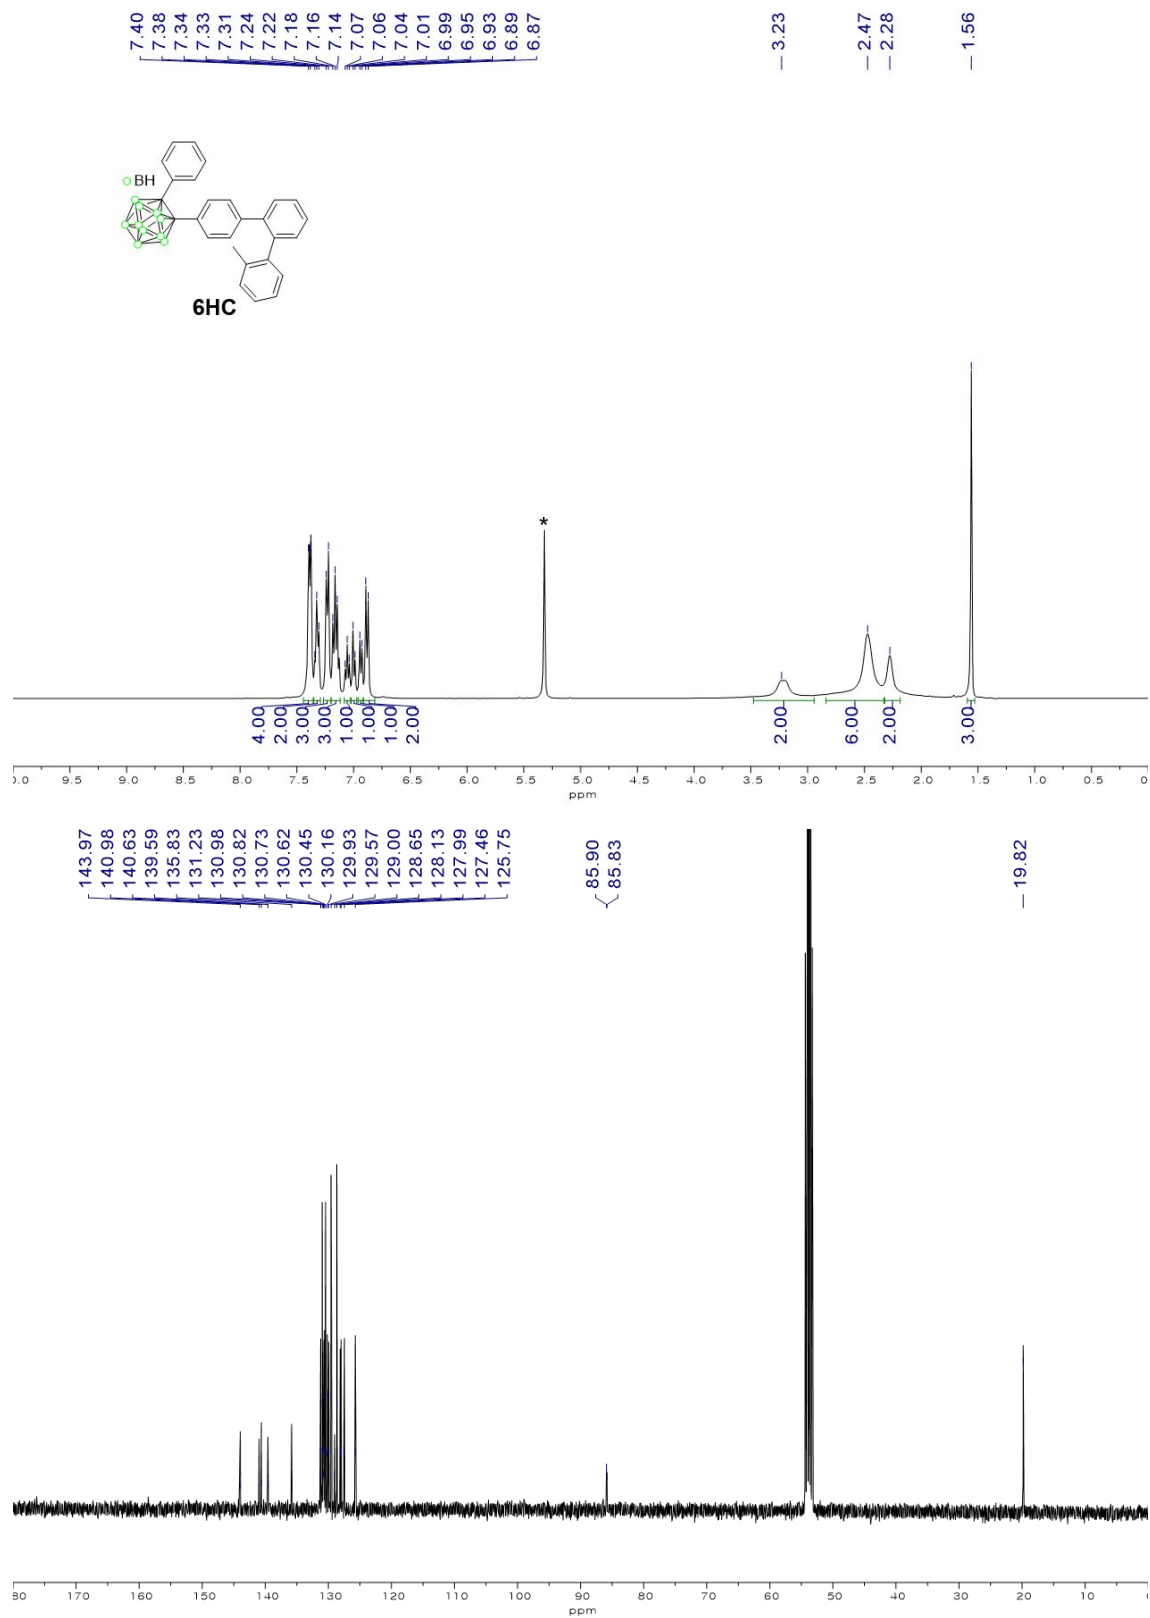

**Figure S25.**  $^1\text{H}\{^{11}\text{B}\}$  (top) and  $^{13}\text{C}$  (bottom) NMR spectra of **6HC** in  $\text{CD}_2\text{Cl}_2$  (\* from residual  $\text{CH}_2\text{Cl}_2$  in  $\text{CD}_2\text{Cl}_2$ ).

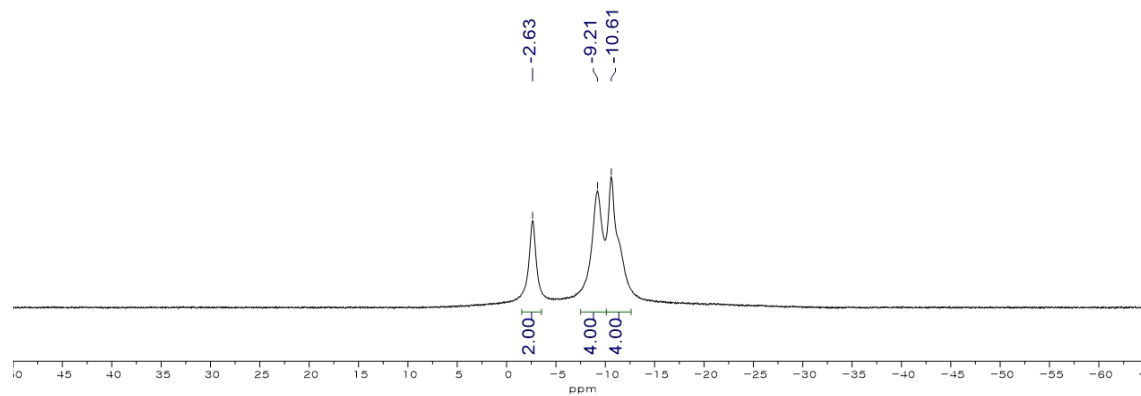

**Figure S26.**  $^{11}\text{B}\{^1\text{H}\}$  NMR spectra of **6HC** in  $\text{CD}_2\text{Cl}_2$ .

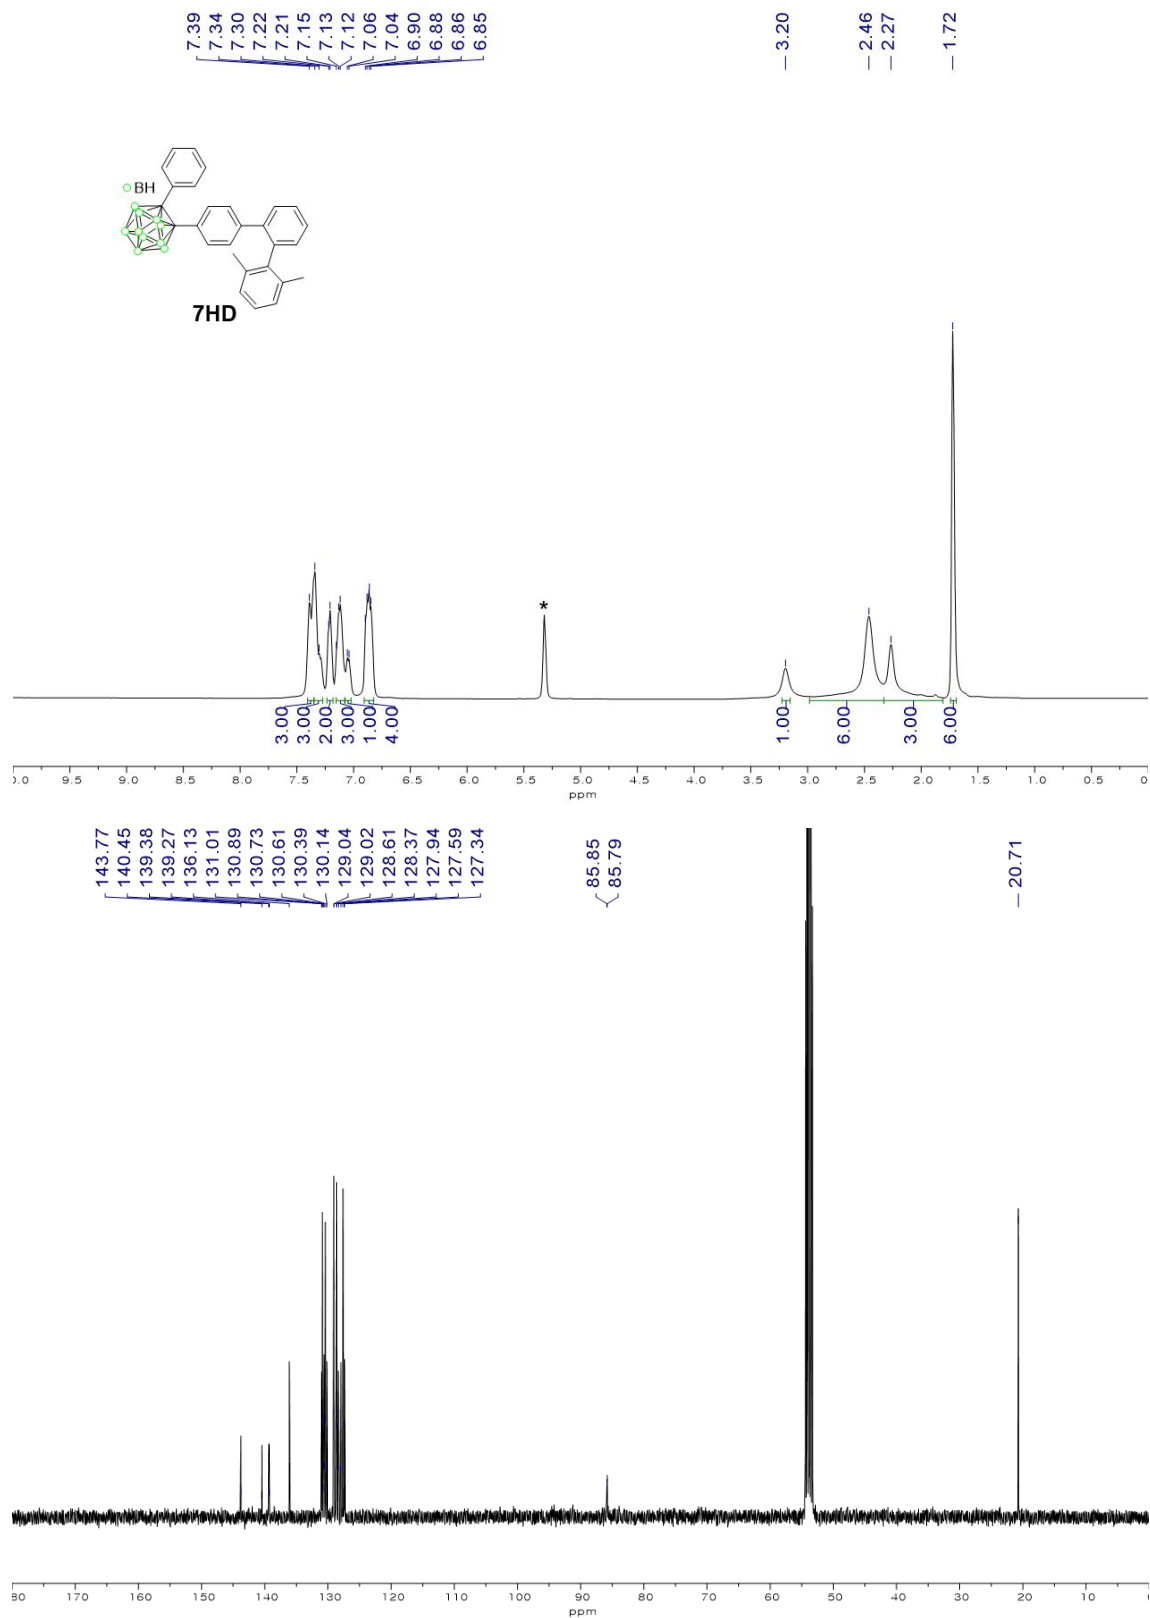

**Figure S27.**  $^1\text{H}\{^{11}\text{B}\}$  (top) and  $^{13}\text{C}$  (bottom) NMR spectra of **7HD** in  $\text{CD}_2\text{Cl}_2$  (\* from residual  $\text{CH}_2\text{Cl}_2$  in  $\text{CD}_2\text{Cl}_2$ ).

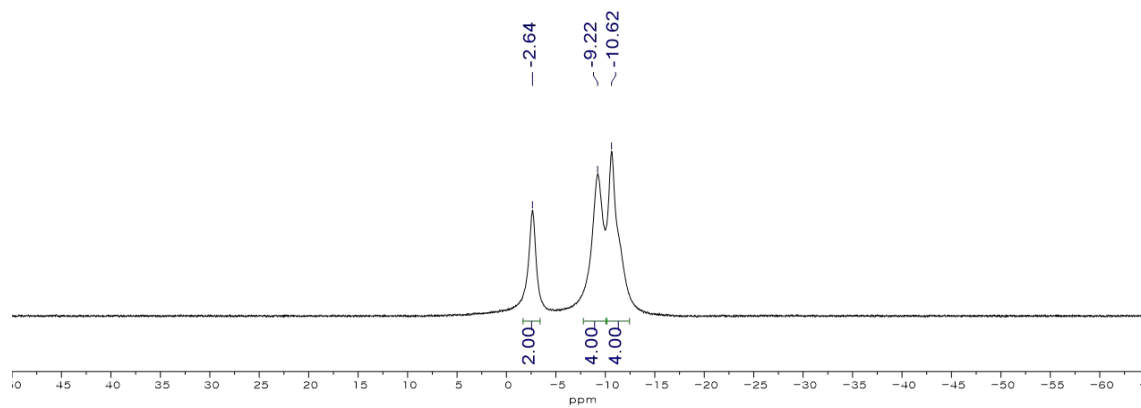

**Figure S28.**  $^{11}\text{B}\{^1\text{H}\}$  NMR spectra of **7HD** in  $\text{CD}_2\text{Cl}_2$ .

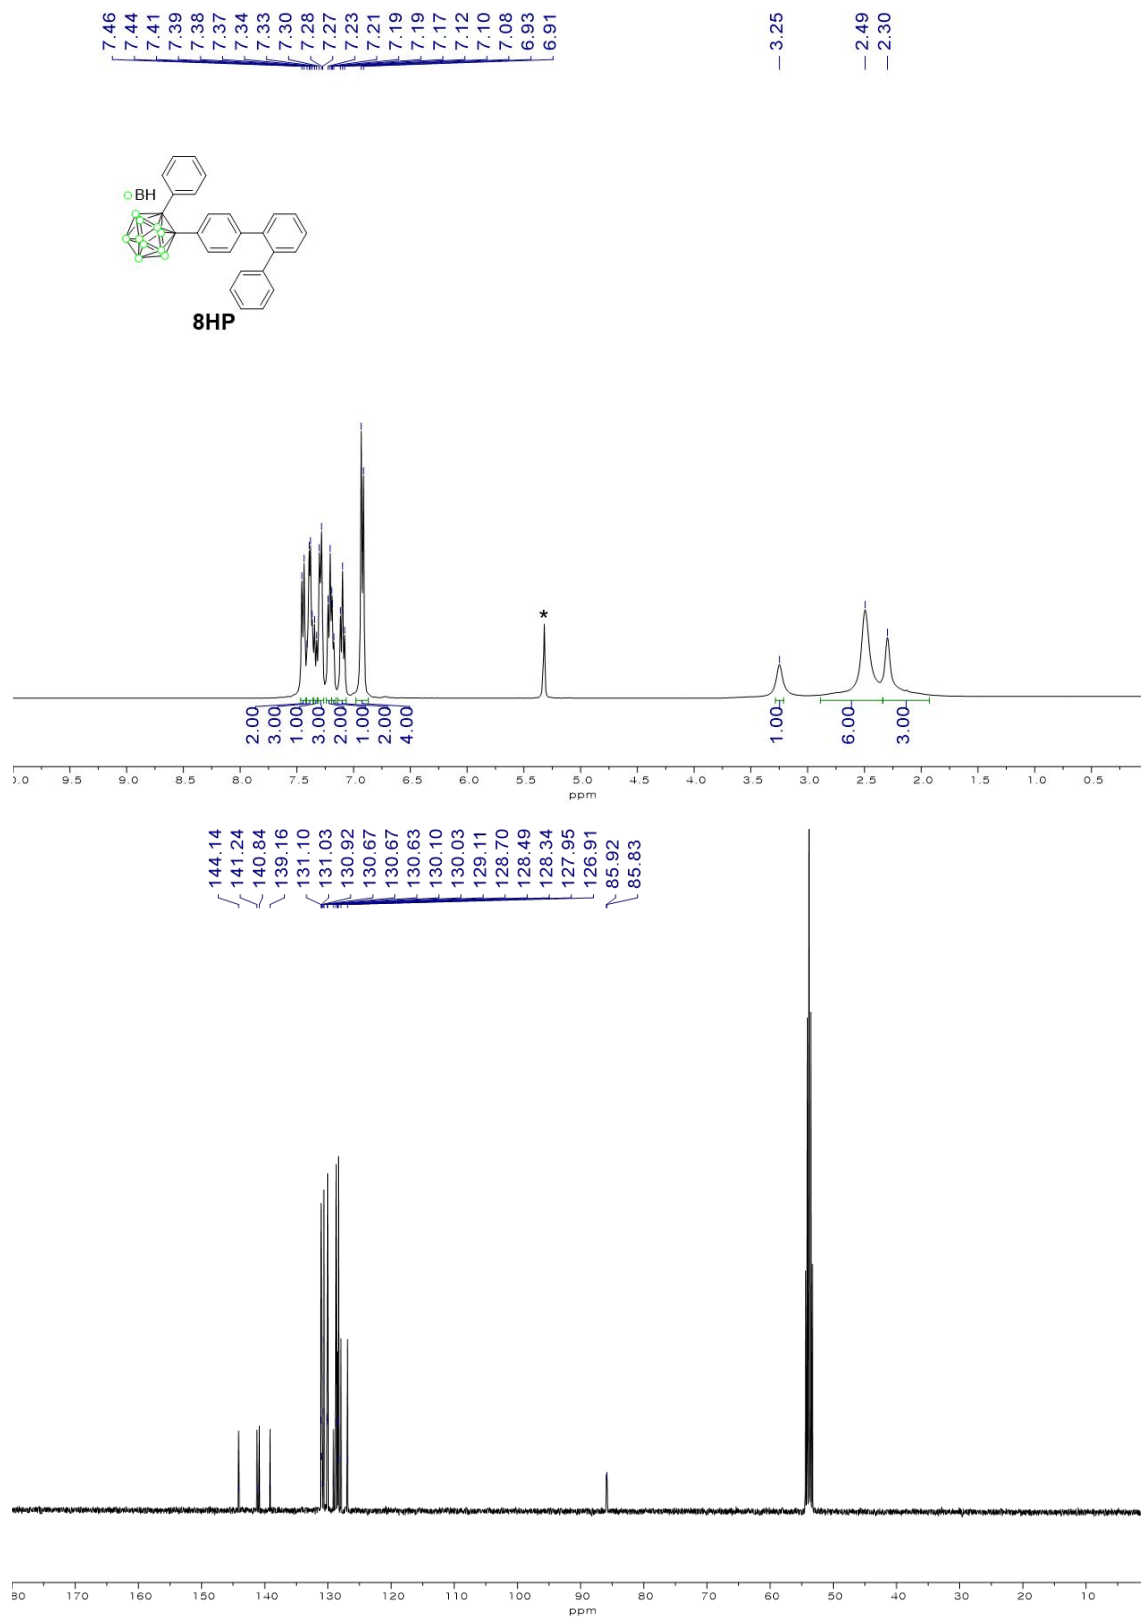

**Figure S29.**  $^1\text{H}\{^{11}\text{B}\}$  (top) and  $^{13}\text{C}$  (bottom) NMR spectra of **8HP** in  $\text{CD}_2\text{Cl}_2$  (\* from residual  $\text{CH}_2\text{Cl}_2$  in  $\text{CD}_2\text{Cl}_2$ ).

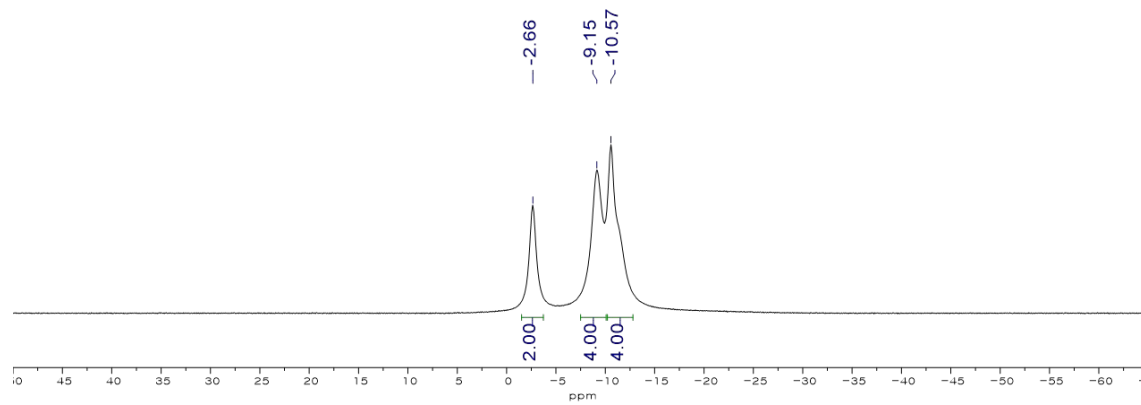

**Figure S30.**  $^{11}\text{B}\{^1\text{H}\}$  NMR spectra of **8HP** in  $\text{CD}_2\text{Cl}_2$ .

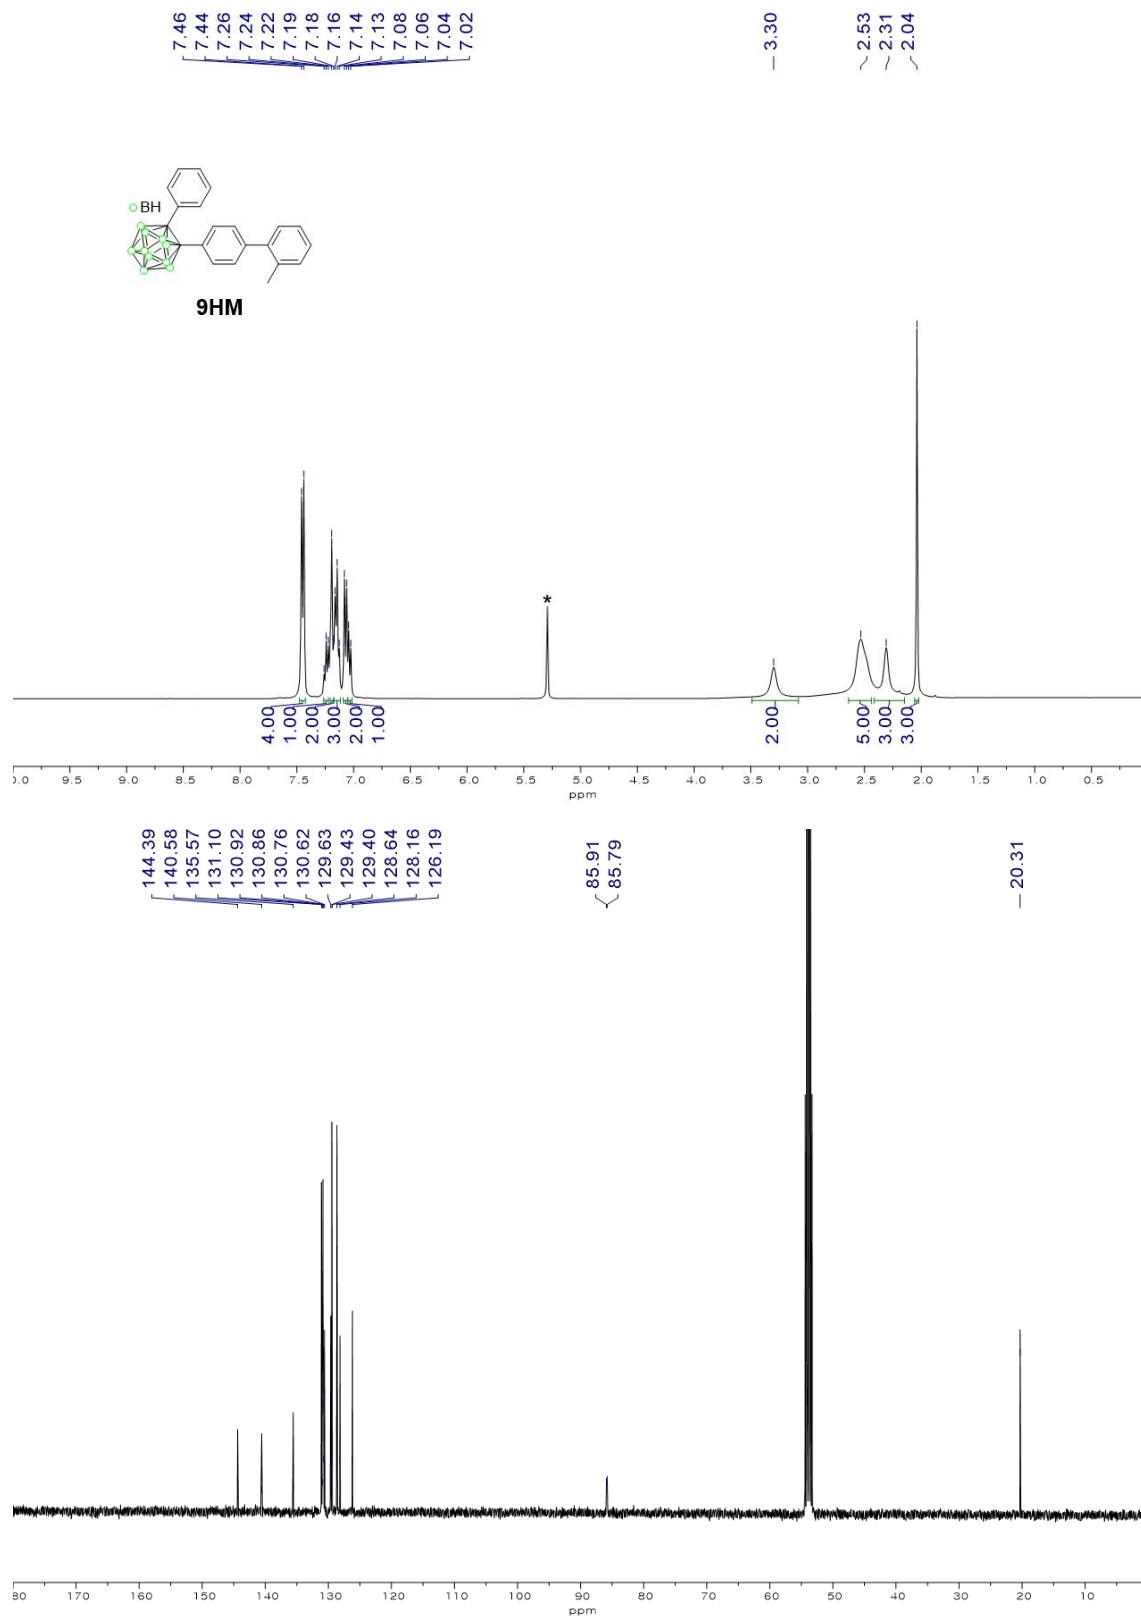

**Figure S31.**  $^1\text{H}\{^{11}\text{B}\}$  (top) and  $^{13}\text{C}$  (bottom) NMR spectra of **9HM** in  $\text{CD}_2\text{Cl}_2$  (\* from residual  $\text{CH}_2\text{Cl}_2$  in  $\text{CD}_2\text{Cl}_2$ ).



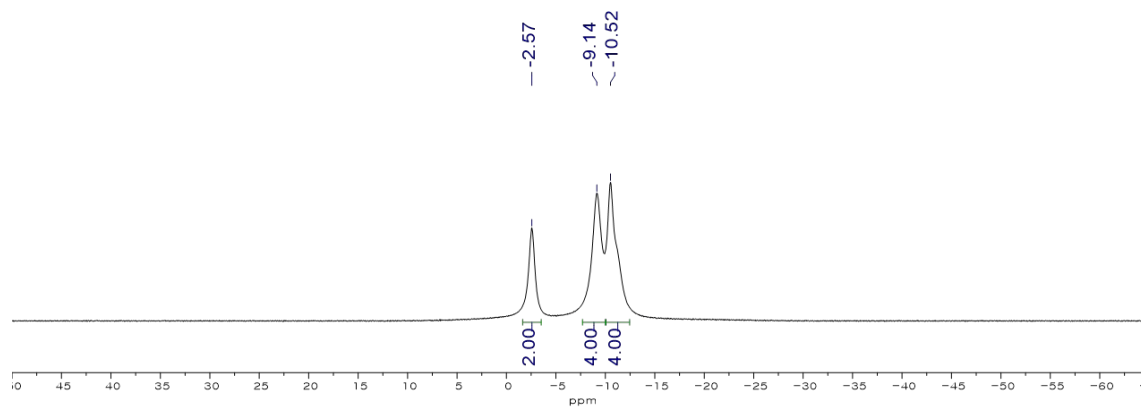

**Figure S32.**  $^{11}\text{B}\{^1\text{H}\}$  NMR spectra of **9HM** in  $\text{CD}_2\text{Cl}_2$ .

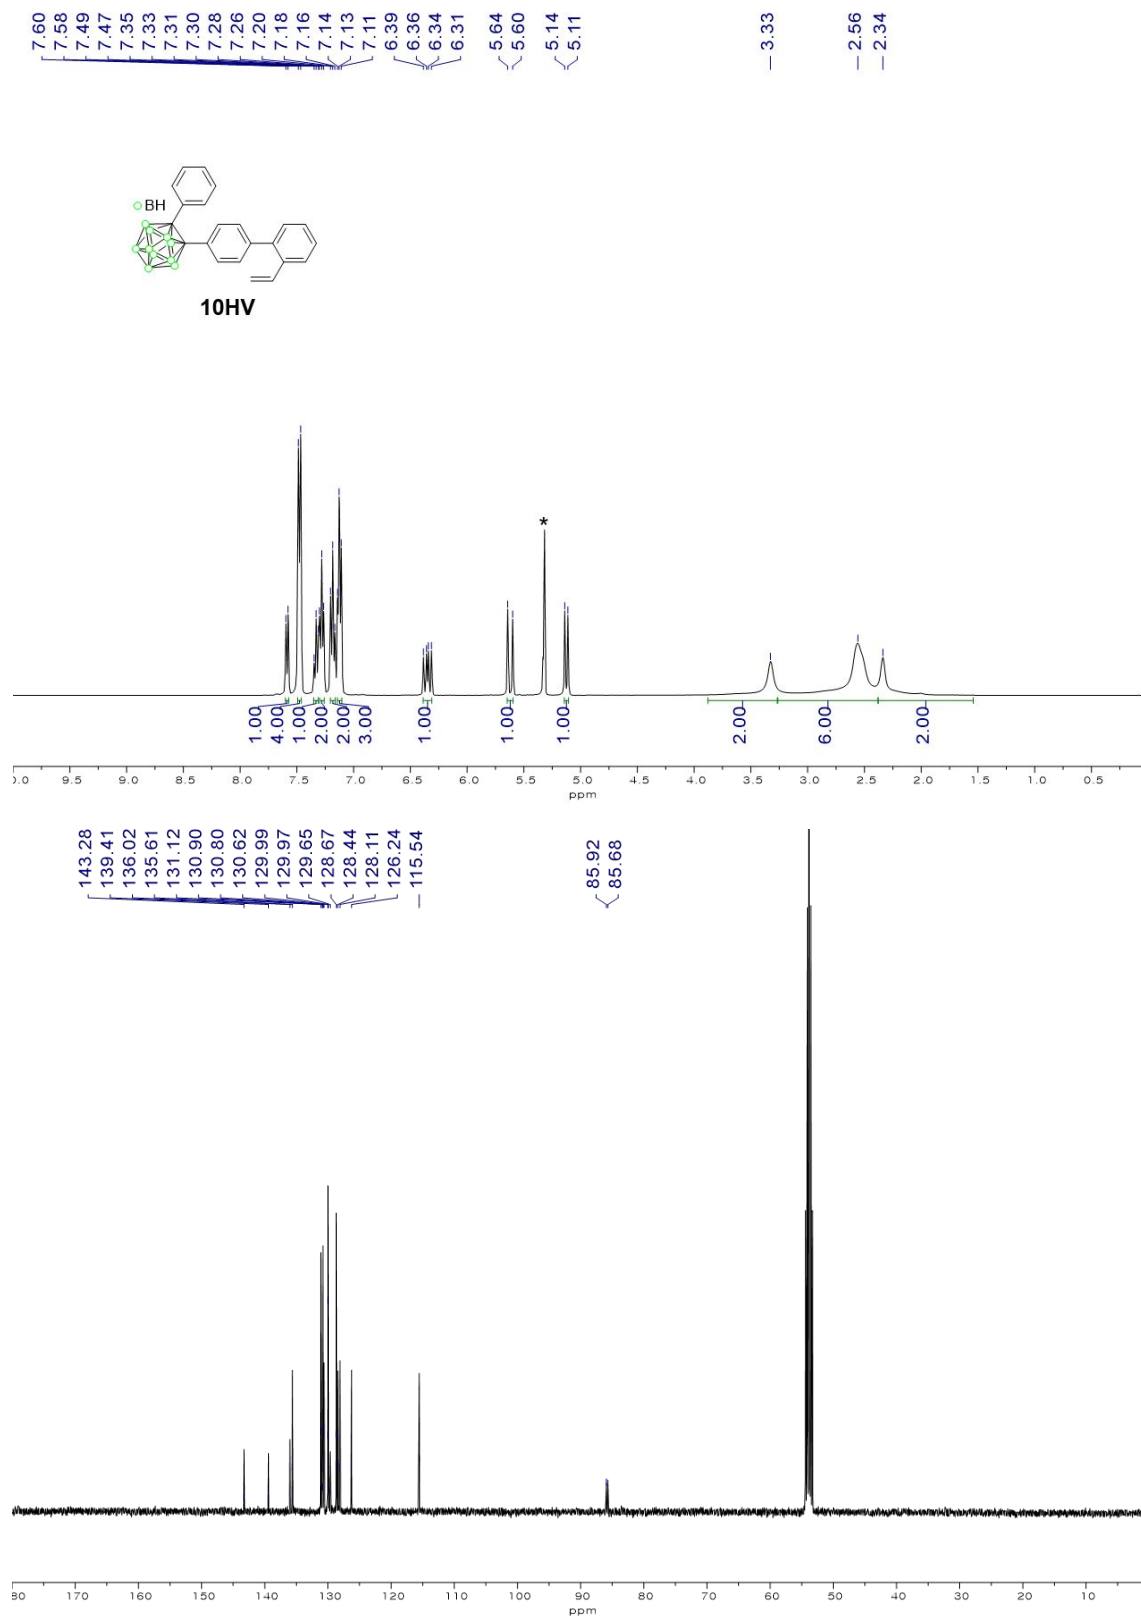

**Figure S33.**  $^1\text{H}\{^{11}\text{B}\}$  (top) and  $^{13}\text{C}$  (bottom) NMR spectra of **10HV** in  $\text{CD}_2\text{Cl}_2$  (\* from residual  $\text{CH}_2\text{Cl}_2$  in  $\text{CD}_2\text{Cl}_2$ ).

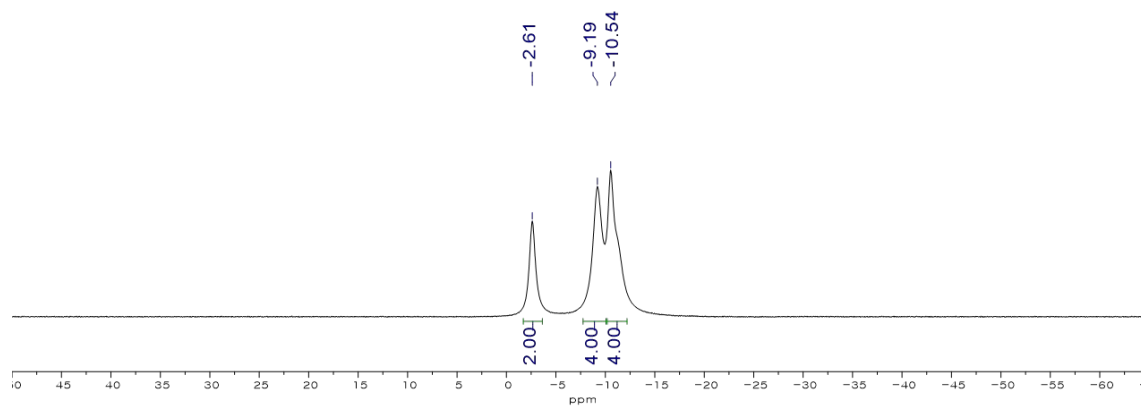

**Figure S34.**  $^{11}\text{B}\{^1\text{H}\}$  NMR spectra of **10HV** in  $\text{CD}_2\text{Cl}_2$ .



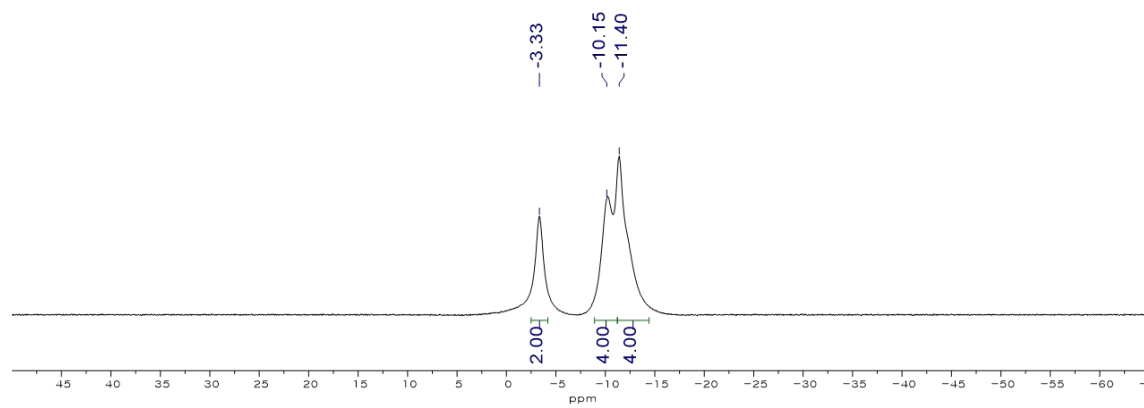

**Figure S36.**  $^{11}\text{B}\{^1\text{H}\}$  NMR spectra of **11HI** in  $\text{CDCl}_3$ .

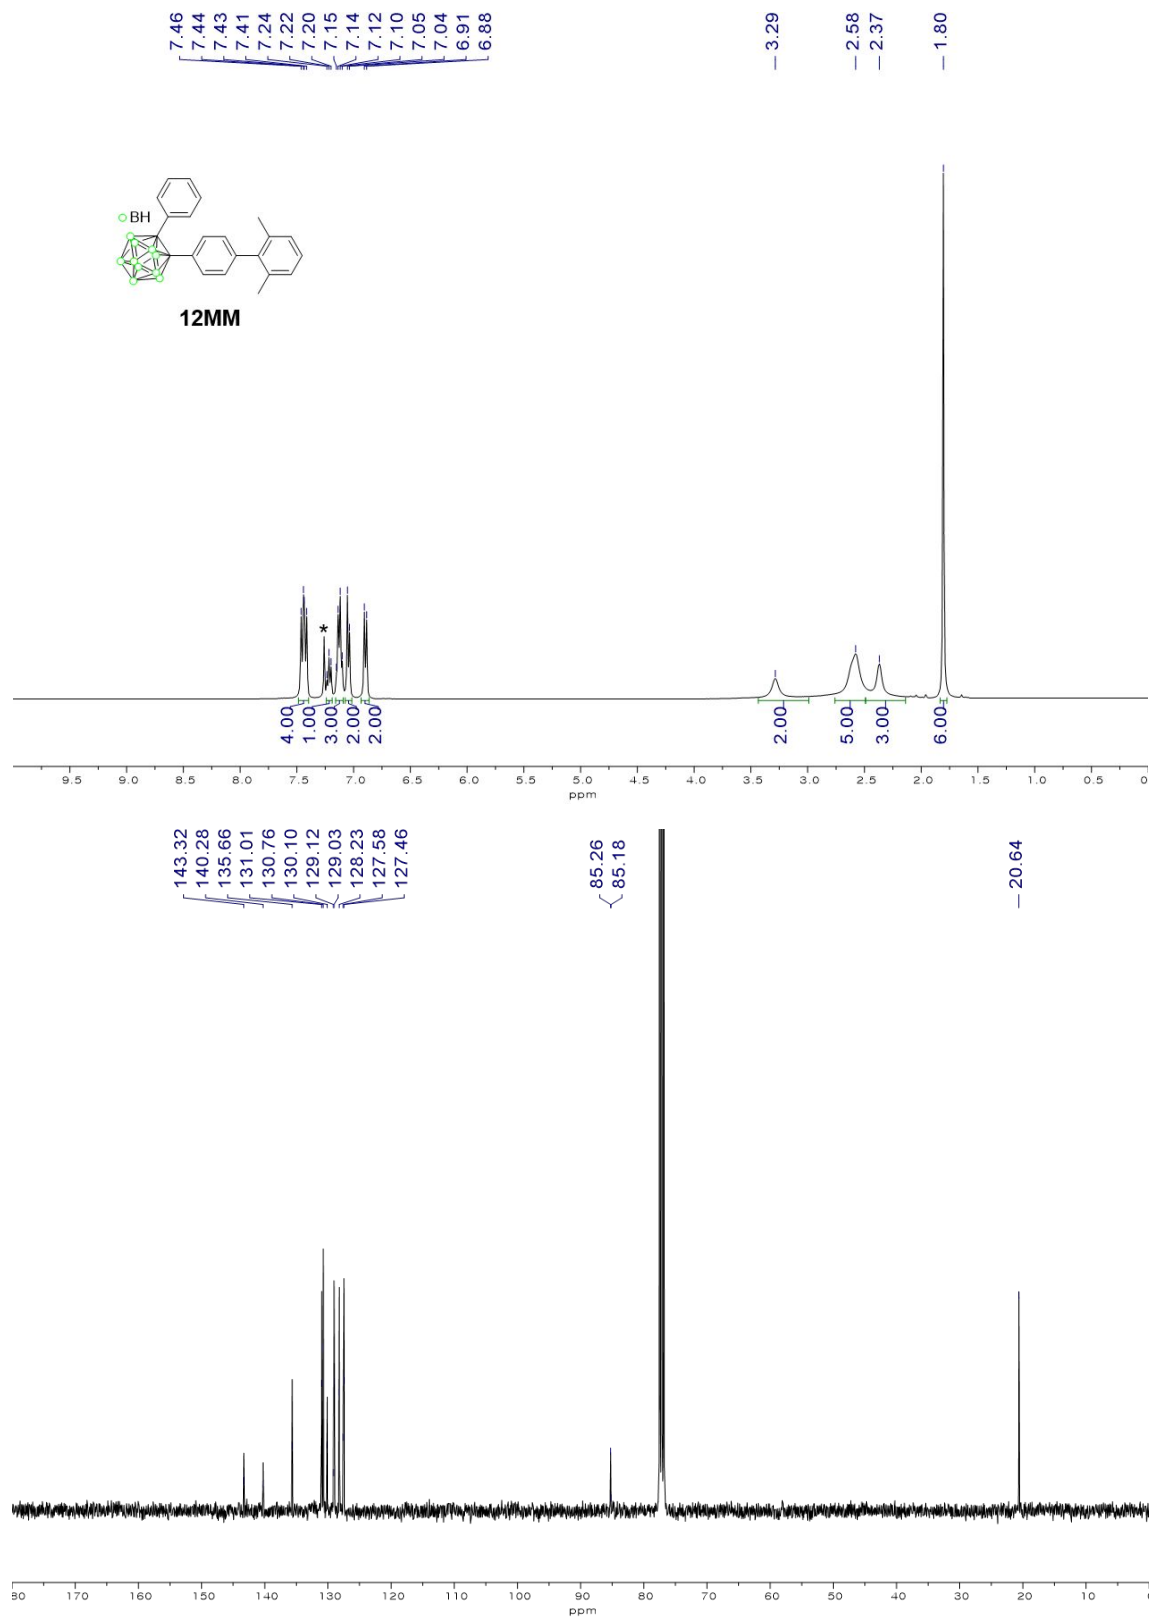

**Figure S37.**  $^1\text{H}\{^{11}\text{B}\}$  (top) and  $^{13}\text{C}$  (bottom) NMR spectra of **12MM** in  $\text{CDCl}_3$  (\* from residual  $\text{CHCl}_3$  in  $\text{CDCl}_3$ ).

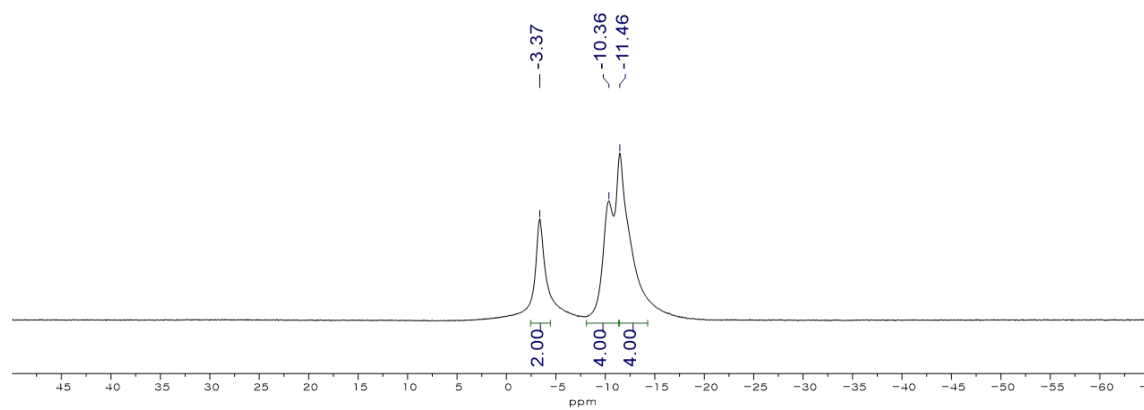

**Figure S38.**  $^{11}\text{B}\{^1\text{H}\}$  NMR spectra of **12MM** in  $\text{CDCl}_3$ .

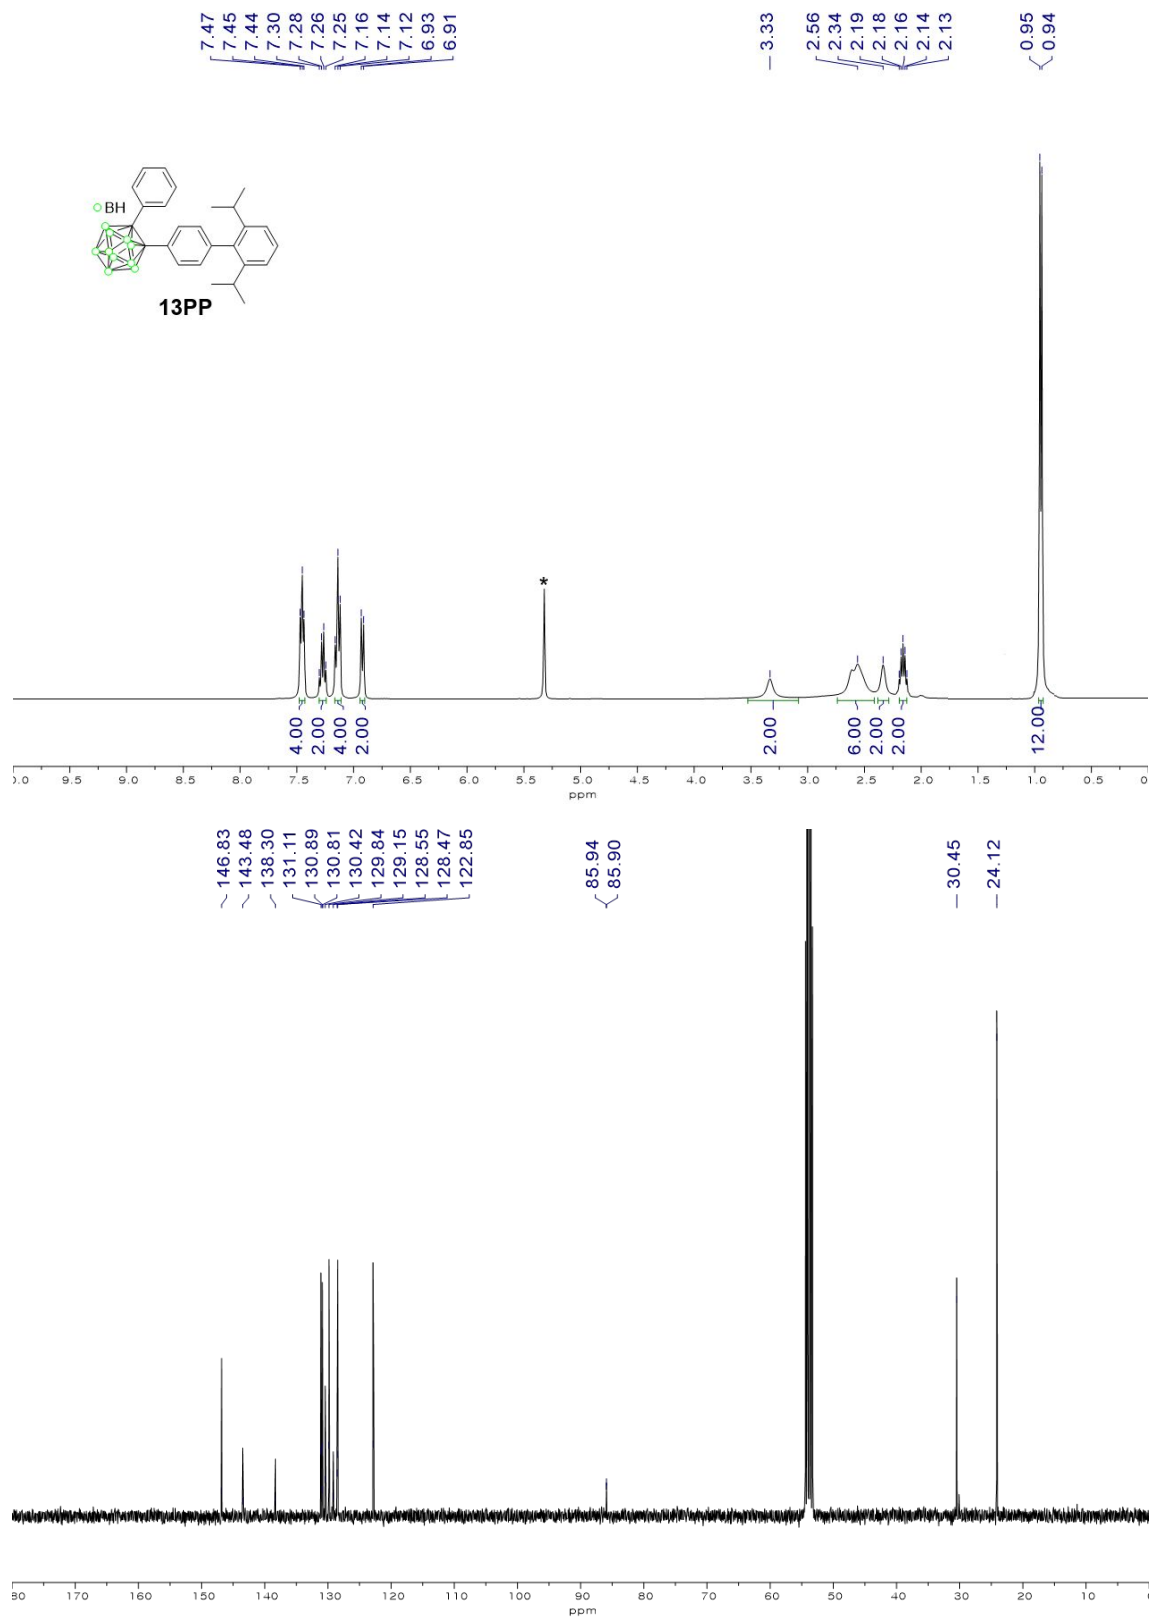

**Figure S39.**  $^1\text{H}\{^{11}\text{B}\}$  (top) and  $^{13}\text{C}$  (bottom) NMR spectra of **13PP** in  $\text{CD}_2\text{Cl}_2$  (\* from residual  $\text{CH}_2\text{Cl}_2$  in  $\text{CD}_2\text{Cl}_2$ ).



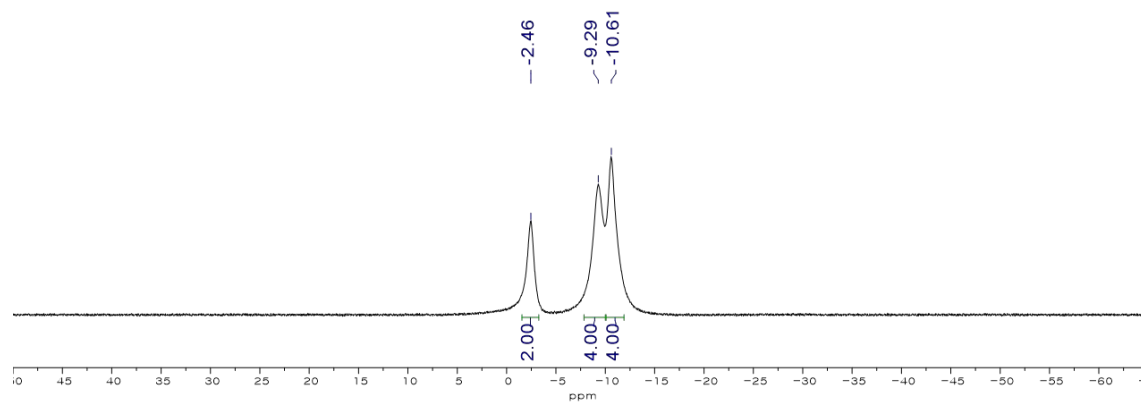

**Figure S40.**  $^{11}\text{B}\{^1\text{H}\}$  NMR spectra of **13PP** in  $\text{CD}_2\text{Cl}_2$ .

**Table S1.** Crystallographic data and parameters for the biphenyl-based *o*-carborane compounds

| Compound                                                                 | 1HF                                             | 2HT                                             | 3HB                                             | 4HN                                             | 5HH                                             | 6HC                                             | 7HD                                             |
|--------------------------------------------------------------------------|-------------------------------------------------|-------------------------------------------------|-------------------------------------------------|-------------------------------------------------|-------------------------------------------------|-------------------------------------------------|-------------------------------------------------|
| Formula                                                                  | C <sub>21</sub> H <sub>24</sub> B <sub>10</sub> | C <sub>26</sub> H <sub>26</sub> B <sub>10</sub> | C <sub>22</sub> H <sub>24</sub> B <sub>10</sub> | C <sub>22</sub> H <sub>26</sub> B <sub>10</sub> | C <sub>20</sub> H <sub>24</sub> B <sub>10</sub> | C <sub>27</sub> H <sub>30</sub> B <sub>10</sub> | C <sub>28</sub> H <sub>32</sub> B <sub>10</sub> |
| Formula weight                                                           | 384.50                                          | 446.57                                          | 396.51                                          | 398.53                                          | 372.49                                          | 462.61                                          | 476.63                                          |
| Crystal system                                                           | Triclinic                                       | Triclinic                                       | Trigonal                                        | Trigonal                                        | Triclinic                                       | Triclinic                                       | Triclinic                                       |
| Space group                                                              | <i>P</i> <sub>-1</sub>                          | <i>P</i> <sub>-1</sub>                          | <i>P</i> <sub>-3</sub>                          | <i>P</i> <sub>-3</sub>                          | <i>P</i> <sub>-1</sub>                          | <i>P</i> <sub>-1</sub>                          | <i>P</i> <sub>-1</sub>                          |
| <i>a</i> (Å)                                                             | 16.697(3)                                       | 7.2470(4)                                       | 21.7420(5)                                      | 21.6636(7)                                      | 9.6210(19)                                      | 10.842(2)                                       | 10.946(2)                                       |
| <i>b</i> (Å)                                                             | 19.892(4)                                       | 9.7449(5)                                       | 21.7420(5)                                      | 21.6636(7)                                      | 9.974(2)                                        | 10.929(2)                                       | 11.085(2)                                       |
| <i>c</i> (Å)                                                             | 22.032(4)                                       | 17.4623(9)                                      | 8.3457(3)                                       | 8.4570(3)                                       | 12.654(3)                                       | 12.469(2)                                       | 12.538(3)                                       |
| $\alpha$ (°)                                                             | 68.42(3)                                        | 74.8317(16)                                     | 90                                              | 90                                              | 73.12(3)                                        | 98.67(3)                                        | 98.03(3)                                        |
| $\beta$ (°)                                                              | 77.35(3)                                        | 89.9817(18)                                     | 90                                              | 90                                              | 70.40(3)                                        | 107.98(3)                                       | 107.22(3)                                       |
| $\gamma$ (°)                                                             | 75.86(3)                                        | 80.1985(16)                                     | 120                                             | 120                                             | 81.54(3)                                        | 101.39(3)                                       | 102.46(3)                                       |
| <i>V</i> (Å <sup>3</sup> )                                               | 6531(3)                                         | 1171.60(11)                                     | 3416.6(2)                                       | 3437.2(2)                                       | 1093.0(5)                                       | 1341.7(5)                                       | 1384.7(6)                                       |
| <i>Z</i>                                                                 | 12                                              | 2                                               | 6                                               | 6                                               | 2                                               | 2                                               | 2                                               |
| $\rho_{\text{calc}}$ (g cm <sup>-3</sup> )                               | 1.173                                           | 1.266                                           | 1.156                                           | 1.155                                           | 1.132                                           | 1.145                                           | 1.143                                           |
| $\mu$ (mm <sup>-1</sup> )                                                | 0.059                                           | 0.065                                           | 0.059                                           | 0.059                                           | 0.057                                           | 0.059                                           | 0.059                                           |
| <i>F</i> (000)                                                           | 2400                                            | 464                                             | 1236                                            | 1248                                            | 388                                             | 484                                             | 500                                             |
| <i>T</i> (K)                                                             | 293(2)                                          | 153(2)                                          | 173(2)                                          | 173(2)                                          | 293(2)                                          | 293(2)                                          | 293(2)                                          |
| Scan mode                                                                | $\Psi$ and $\omega$ scan                        |
| <i>hkl</i> range                                                         | -21 → +21,<br>-25 → +25,<br>-25 → +28           | -9 → +9,<br>-12 → +12,<br>-22 → +22             | -28 → +25,<br>-28 → +28,<br>-10 → +10           | -26 → +28,<br>-24 → +28,<br>-11 → +11           | -12 → +12,<br>-12 → +12,<br>-16 → +16           | -14 → +12,<br>-14 → +14,<br>-15 → +16           | -12 → +14,<br>-14 → +14,<br>-16 → +16           |
| Measd reflns                                                             | 106043                                          | 58119                                           | 28679                                           | 30032                                           | 10903                                           | 13453                                           | 14018                                           |
| Unique reflns [ <i>R</i> <sub>int</sub> ]                                | 29851 [0.0990]                                  | 5377 [0.0424]                                   | 5185 [0.0485]                                   | 5664 [0.0294]                                   | 5001 [0.0453]                                   | 6108 [0.0810]                                   | 6304 [0.0320]                                   |
| Reflns used for refinement                                               | 29851                                           | 5377                                            | 5185                                            | 5664                                            | 5001                                            | 6108                                            | 6304                                            |
| Refined parameters                                                       | 1675                                            | 355                                             | 290                                             | 308                                             | 271                                             | 335                                             | 345                                             |
| <i>R</i> <sub>1</sub> <sup>a</sup> ( <i>I</i> > 2 $\sigma$ ( <i>I</i> )) | 0.0625                                          | 0.0484                                          | 0.0500                                          | 0.0523                                          | 0.0599                                          | 0.0913                                          | 0.0539                                          |
| <i>wR</i> <sub>2</sub> <sup>b</sup> all data                             | 0.1724                                          | 0.1360                                          | 0.1316                                          | 0.1387                                          | 0.1469                                          | 0.2624                                          | 0.1379                                          |
| GOF on <i>F</i> <sup>2</sup>                                             | 1.003                                           | 1.005                                           | 1.025                                           | 1.036                                           | 1.007                                           | 1.032                                           | 1.008                                           |
| $\rho_{\text{fin}}$ (max/min) (e Å <sup>-3</sup> )                       | 0.283, -0.248                                   | 0.334, -0.222                                   | 0.253, -0.222                                   | 0.329, -0.229                                   | 0.222, -0.179                                   | 1.065, -0.300                                   | 0.258, -0.234                                   |

| Compound                                                        | 8HP                                             | 9HM                                             | 10HV                                            | 11HI                                            | 12MM                                            | 13PP                                            |
|-----------------------------------------------------------------|-------------------------------------------------|-------------------------------------------------|-------------------------------------------------|-------------------------------------------------|-------------------------------------------------|-------------------------------------------------|
| Formula                                                         | C <sub>26</sub> H <sub>28</sub> B <sub>10</sub> | C <sub>21</sub> H <sub>26</sub> B <sub>10</sub> | C <sub>22</sub> H <sub>26</sub> B <sub>10</sub> | C <sub>23</sub> H <sub>30</sub> B <sub>10</sub> | C <sub>22</sub> H <sub>28</sub> B <sub>10</sub> | C <sub>26</sub> H <sub>36</sub> B <sub>10</sub> |
| Formula weight                                                  | 448.58                                          | 386.52                                          | 398.53                                          | 414.57                                          | 400.54                                          | 456.65                                          |
| Crystal system                                                  | Monoclinic                                      | Triclinic                                       | Triclinic                                       | Monoclinic                                      | Monoclinic                                      | Monoclinic                                      |
| Space group                                                     | <i>P</i> 2 <sub>1</sub> / <i>n</i>              | <i>P</i> <sub>-1</sub>                          | <i>P</i> <sub>-1</sub>                          | <i>P</i> 2 <sub>1</sub> / <i>n</i>              | <i>P</i> 2 <sub>1</sub> / <i>n</i>              | <i>C</i> 2/ <i>c</i>                            |
| <i>a</i> (Å)                                                    | 13.1111(7)                                      | 9.5380(19)                                      | 10.377(2)                                       | 12.262(2)                                       | 10.303(2)                                       | 22.0889(10)                                     |
| <i>b</i> (Å)                                                    | 14.3249(8)                                      | 9.795(2)                                        | 10.518(2)                                       | 15.467(3)                                       | 16.550(3)                                       | 12.0182(6)                                      |
| <i>c</i> (Å)                                                    | 13.4063(7)                                      | 13.244(3)                                       | 12.609(3)                                       | 13.498(3)                                       | 14.173(3)                                       | 24.8327(12)                                     |
| $\alpha$ (°)                                                    | 90                                              | 103.96(3)                                       | 71.67(3)                                        | 90                                              | 90                                              | 90                                              |
| $\beta$ (°)                                                     | 98.9825(17)                                     | 103.33(3)                                       | 83.43(3)                                        | 103.38(3)                                       | 102.50(3)                                       | 104.5587(16)                                    |
| $\gamma$ (°)                                                    | 90                                              | 101.09(3)                                       | 61.21(3)                                        | 90                                              | 90                                              | 90                                              |
| <i>V</i> (Å <sup>3</sup> )                                      | 2487.0(2)                                       | 1127.4(5)                                       | 1143.7(5)                                       | 2490.5(9)                                       | 2359.4(9)                                       | 6380.6(5)                                       |
| <i>Z</i>                                                        | 4                                               | 2                                               | 2                                               | 4                                               | 4                                               | 8                                               |
| $\rho_{\text{calc}}$ (g cm <sup>-3</sup> )                      | 1.198                                           | 1.139                                           | 1.157                                           | 1.106                                           | 1.128                                           | 0.951                                           |
| $\mu$ (mm <sup>-1</sup> )                                       | 0.062                                           | 0.057                                           | 0.059                                           | 0.056                                           | 0.057                                           | 0.049                                           |
| <i>F</i> (000)                                                  | 936                                             | 404                                             | 416                                             | 872                                             | 840                                             | 1936                                            |
| <i>T</i> (K)                                                    | 153(2)                                          | 293(2)                                          | 293(2)                                          | 293(2)                                          | 293(2)                                          | 173(2)                                          |
| Scan mode                                                       | $\Psi$ and $\omega$ scan                        |
| <i>hkl</i> range                                                | -12 → +12,<br>-12 → +12,<br>-16 → +16           | -12 → +11,<br>-12 → +12,<br>-17 → +17           | -13 → +13,<br>-13 → +13,<br>-16 → +16           | -15 → +15,<br>-20 → +20,<br>-16 → +17           | -13 → +13,<br>-20 → +21,<br>-18 → +18           | -27 → +28,<br>-15 → +15,<br>-32 → +31           |
| Measd reflns                                                    | 47558                                           | 11349                                           | 11512                                           | 24689                                           | 23284                                           | 64222                                           |
| Unique reflns [ <i>R</i> <sub>int</sub> ]                       | 5477 [0.0524]                                   | 5153 [0.0357]                                   | 5217 [0.0305]                                   | 5707 [0.0331]                                   | 5376 [0.1084]                                   | 7271 [0.0679]                                   |
| Reflns used for refinement                                      | 5477                                            | 5153                                            | 5217                                            | 5707                                            | 5376                                            | 7271                                            |
| Refined parameters                                              | 355                                             | 281                                             | 289                                             | 300                                             | 291                                             | 331                                             |
| <i>R</i> <sub>1</sub> <sup>a</sup> ( <i>I</i> > 2σ( <i>I</i> )) | 0.0458                                          | 0.0546                                          | 0.0541                                          | 0.0589                                          | 0.0793                                          | 0.0654                                          |
| w <i>R</i> <sub>2</sub> <sup>b</sup> all data                   | 0.1183                                          | 0.2035                                          | 0.1526                                          | 0.1833                                          | 0.2031                                          | 0.2217                                          |
| GOF on <i>F</i> <sup>2</sup>                                    | 1.004                                           | 1.005                                           | 1.006                                           | 1.005                                           | 1.006                                           | 1.002                                           |
| $\rho_{\text{fin}}$ (max/min) (e Å <sup>-3</sup> )              | 0.316, -0.236                                   | 0.220, -0.349                                   | 0.283, -0.197                                   | 0.332, -0.215                                   | 0.158, -0.152                                   | 0.367, -0.277                                   |

<sup>a</sup>  $R_1 = \sum ||F_o| - |F_c|| / \sum |F_o|$ . <sup>b</sup>  $wR_2 = \{[\sum w(F_o^2 - F_c^2)^2] / [\sum w(F_o^2)^2]\}^{1/2}$ .

**Table S2.** Selected bond lengths (Å) and angles (°) for the biphenyl-based *o*-carborane compounds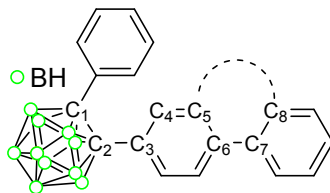

|             | lengths    |            | angles     |            |            |            |
|-------------|------------|------------|------------|------------|------------|------------|
|             | C1–C2      | C2–C3      | C1–C2–C3   | C2–C3–C4   | C5–C6–C7   | C6–C7–C8   |
| <b>1HF</b>  | 1.732(7)   | 1.497(7)   | 119.0(4)   | 120.2(5)   | 120.6(5)   | 118.4(5)   |
| <b>2HT</b>  | 1.7280(17) | 1.5078(16) | 118.57(10) | 119.96(11) | 118.37(11) | 121.93(11) |
| <b>3HB</b>  | 1.7210(17) | 1.5018(18) | 120.87(10) | 119.57(12) | 117.49(12) | 121.69(13) |
| <b>4HN</b>  | 1.7218(15) | 1.5056(15) | 120.13(9)  | 119.36(10) | 117.99(11) | 121.73(12) |
| <b>5HH</b>  | 1.723(2)   | 1.504(2)   | 117.57(12) | 119.85(13) | 117.07(14) | 121.69(14) |
| <b>6HC</b>  | 1.720(4)   | 1.508(3)   | 118.75(19) | 121.9(2)   | 117.5(2)   | 121.2(2)   |
| <b>7HD</b>  | 1.726(2)   | 1.506(2)   | 118.51(13) | 121.89(14) | 117.62(15) | 121.41(15) |
| <b>8HP</b>  | 1.7207(18) | 1.5029(18) | 118.51(10) | 120.82(12) | 118.29(12) | 120.77(13) |
| <b>9HM</b>  | 1.721(2)   | 1.5078(18) | 117.61(11) | 119.23(12) | 117.11(14) | 121.49(14) |
| <b>10HV</b> | 1.7282(18) | 1.5064(17) | 116.59(10) | 121.38(11) | 117.30(13) | 121.43(12) |
| <b>11HI</b> | 1.7200(17) | 1.5057(16) | 118.14(10) | 120.14(11) | 117.59(13) | 121.60(13) |
| <b>12MM</b> | 1.722(3)   | 1.503(3)   | 117.00(18) | 121.8(2)   | 116.7(2)   | 121.9(3)   |
| <b>13PP</b> | 1.714(2)   | 1.5029(19) | 116.83(11) | 122.08(13) | 117.50(13) | 121.54(14) |

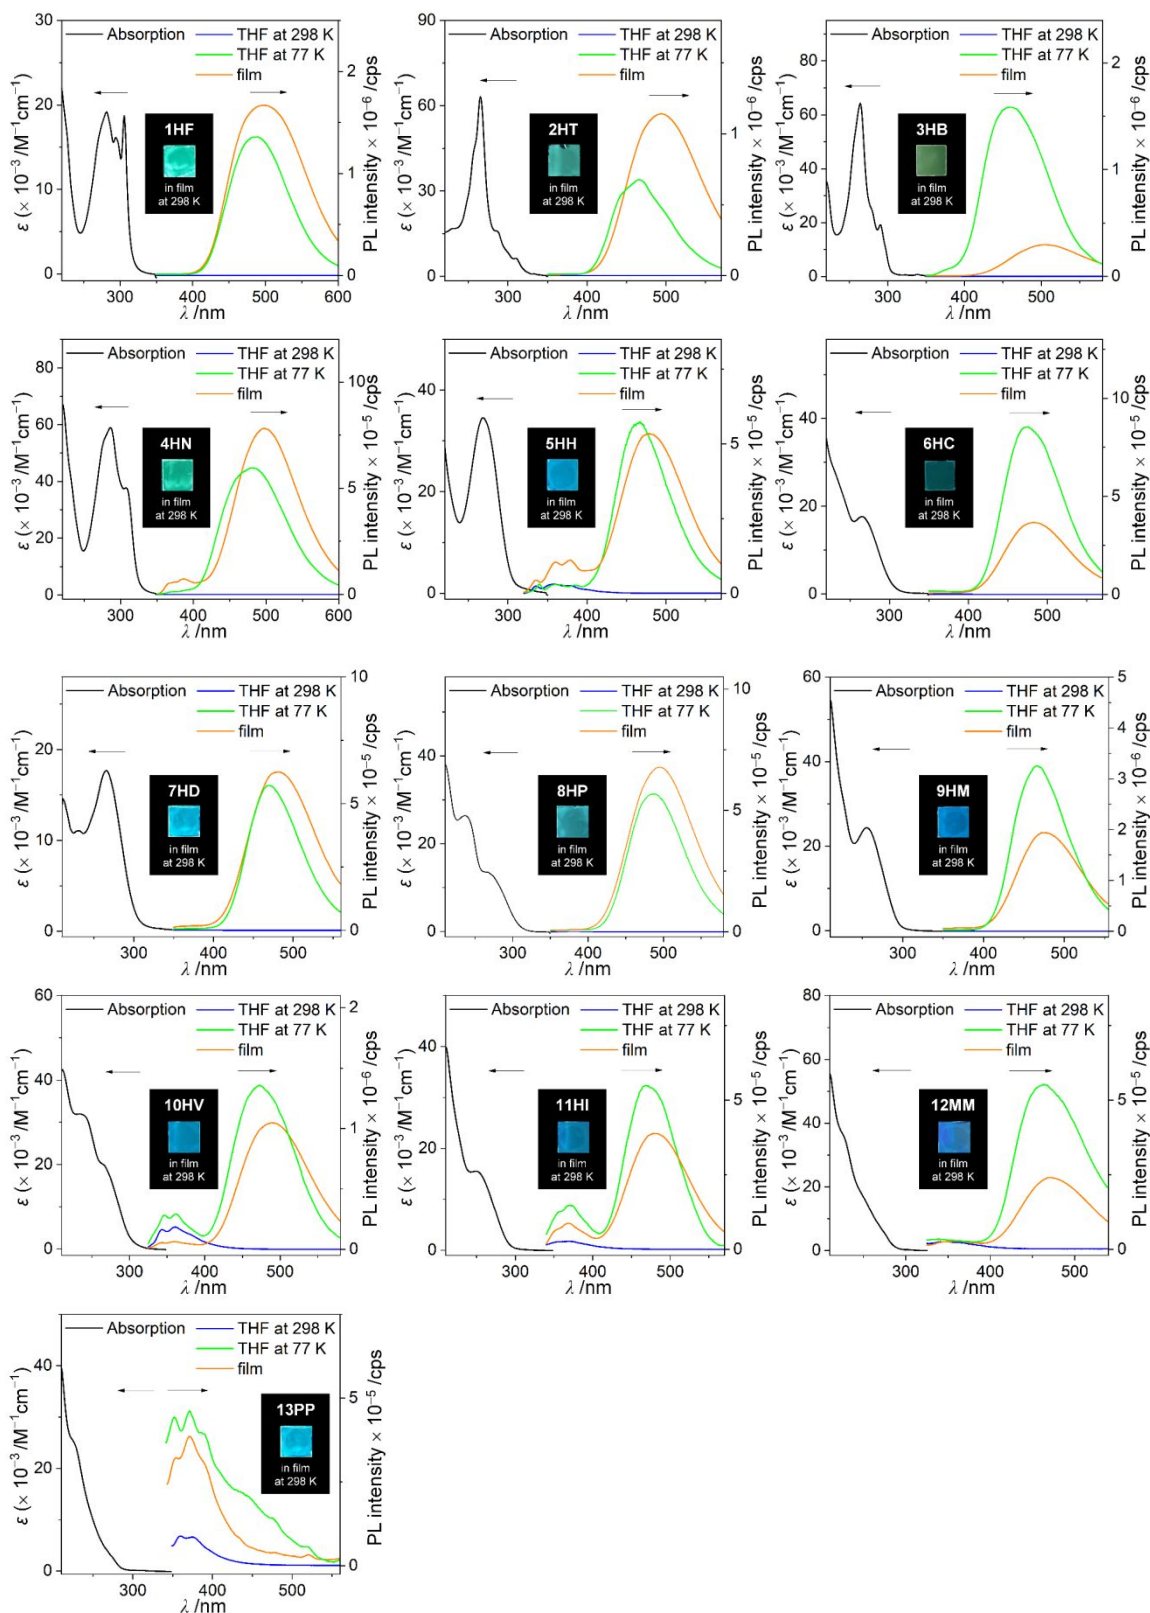

**Figure S41.** Ultraviolet-visible (UV-vis) absorption (left side) and photoluminescence (PL) spectra (right side) of biphenyl-based *o*-carboranyl compounds (**1HF–13PP**). Black line: absorption spectra in THF ( $3.0 \times 10^{-5}$  M); blue line: PL spectra in THF ( $3.0 \times 10^{-5}$  M) at 298 K; green line: PL spectra in THF ( $3.0 \times 10^{-5}$  M) at 77 K; orange line: PL spectra in film (5 wt% doped with PMMA) at 298 K. Inset figures show the emission color in each state when irradiated by a hand-held UV lamp ( $\lambda_{\text{ex}} = 265$  nm).

**Table S3.** The photophysical data for biphenyl-based *o*-carboranyl compounds.

|             | $\lambda_{em,max}$    |                      |                   | $\Phi_{em}^c$         |                   |
|-------------|-----------------------|----------------------|-------------------|-----------------------|-------------------|
|             | at 298 K <sup>a</sup> | at 77 K <sup>a</sup> | film <sup>b</sup> | at 298 K <sup>a</sup> | film <sup>b</sup> |
| <b>1HF</b>  | - <sup>d</sup>        | 487                  | 498               | - <sup>d</sup>        | 0.292             |
| <b>2HT</b>  | - <sup>d</sup>        | 467                  | 494               | - <sup>d</sup>        | 0.356             |
| <b>3HB</b>  | - <sup>d</sup>        | 459                  | 506               | - <sup>d</sup>        | 0.140             |
| <b>4HN</b>  | - <sup>d</sup>        | 482                  | 387 (sh), 497     | - <sup>d</sup>        | 0.283             |
| <b>5HH</b>  | 357                   | 358, 467             | 358, 379, 478     | 0.02 (LE)             | 0.197             |
| <b>6HC</b>  | - <sup>d</sup>        | 474                  | 483               | - <sup>d</sup>        | 0.208             |
| <b>7HD</b>  | - <sup>d</sup>        | 471                  | 481               | - <sup>d</sup>        | 0.182             |
| <b>8HP</b>  | - <sup>d</sup>        | 487                  | 495               | - <sup>d</sup>        | 0.197             |
| <b>9HM</b>  | - <sup>d</sup>        | 466                  | 475               | - <sup>d</sup>        | 0.192             |
| <b>10HV</b> | 343, 361              | 346, 361, 473        | 361 (sh), 489     | 0.07 (LE)             | 0.068             |
| <b>11HI</b> | 368 (tr)              | 370 (sh), 468        | 368 (sh), 480     | <0.01 (LE)            | 0.025             |
| <b>12MM</b> | 351 (tr)              | 463                  | 470               | - <sup>d</sup>        | 0.017             |
| <b>13PP</b> | 360, 375              | 352, 372, 475 (sh)   | 354, 372          | <0.01 (LE)            | <0.01 (LE)        |

<sup>a</sup> $c = 3.0 \times 10^{-5}$  M in THF. <sup>b</sup>Measured in the film state (5 wt% doped in PMMA). <sup>c</sup>Absolute PL quantum yield. <sup>d</sup>Not observed due to weak emission. tr = trace, sh = shoulder peak.

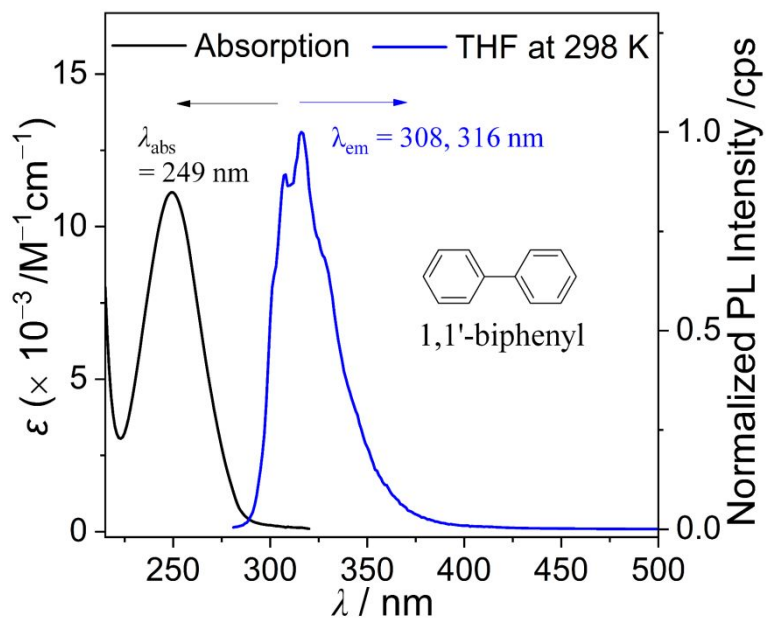

**Figure S42.** UV-vis absorption and PL spectra for 1,1'-biphenyl ( $\lambda_{\text{ex}} = 269 \text{ nm}$ ) in THF ( $3.0 \times 10^{-5} \text{ M}$ ) at 298 K.

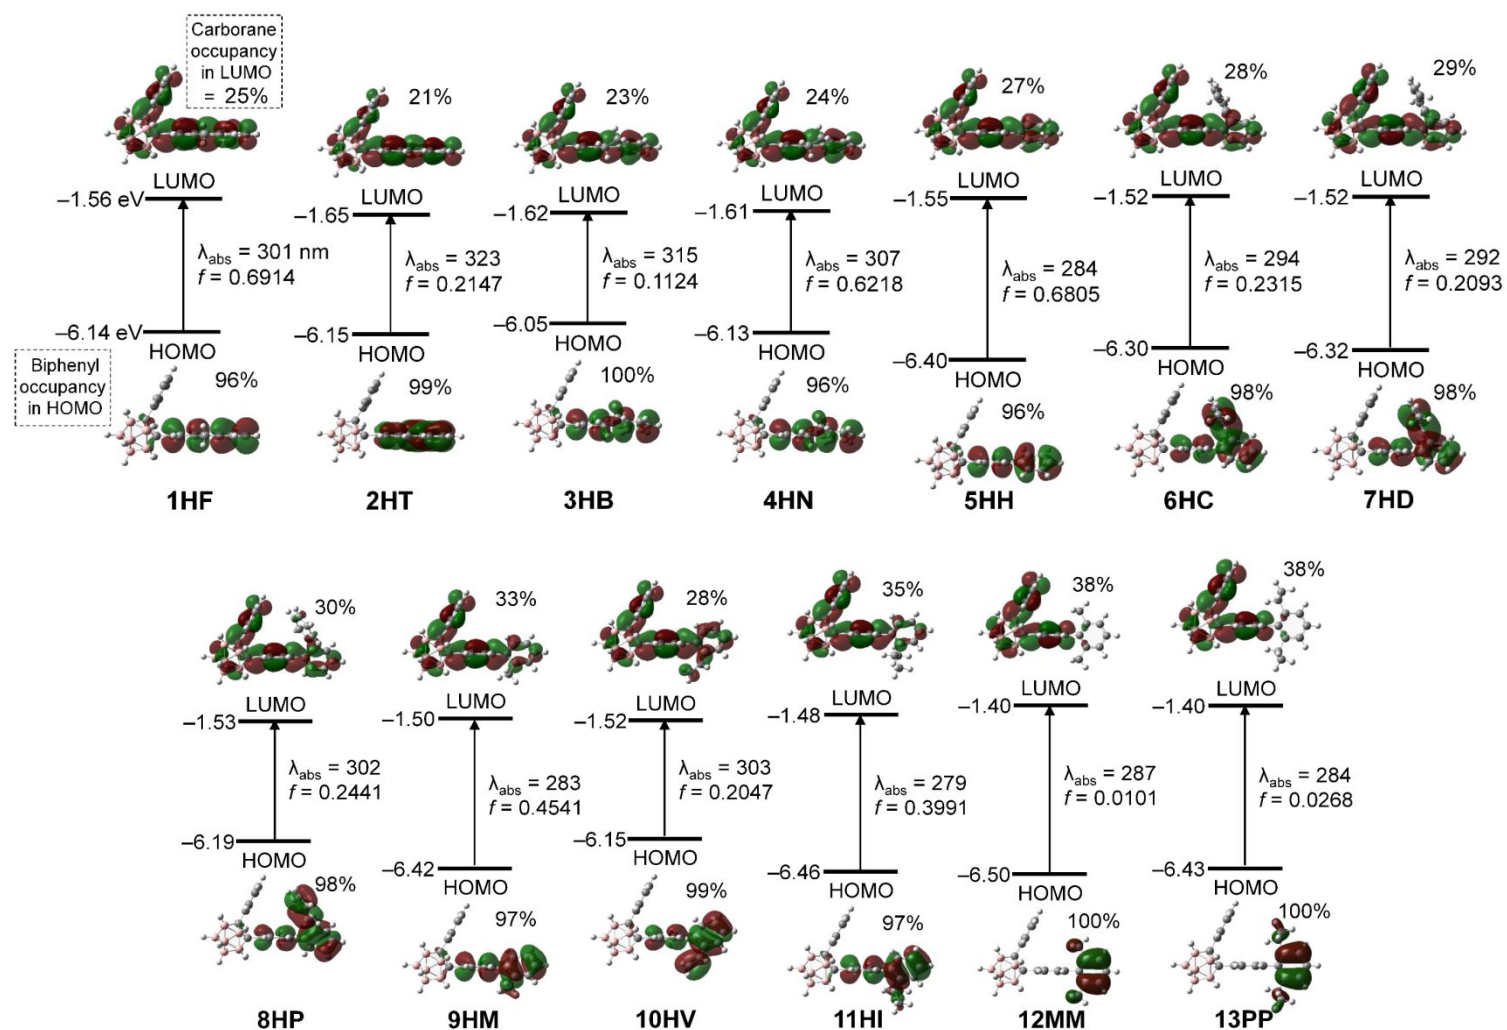

**Figure S43.** Frontier molecular orbitals of biphenyl-based *o*-carboranyl compounds **1HF–13PP** at ground state ( $S_0$ ) with their relative energies from density functional theory calculations (Isovalue = 0.04 a.u.) and molecular orbital distributions on the *o*-carborane moieties of the lowest unoccupied molecular orbital (LUMO) levels (%) and on the biphenyl group of the highest occupied molecular orbital (HOMO) level. The transition energy (in nm) was calculated using the TD-B3LYP method with 6-31G(d,p) basis sets.



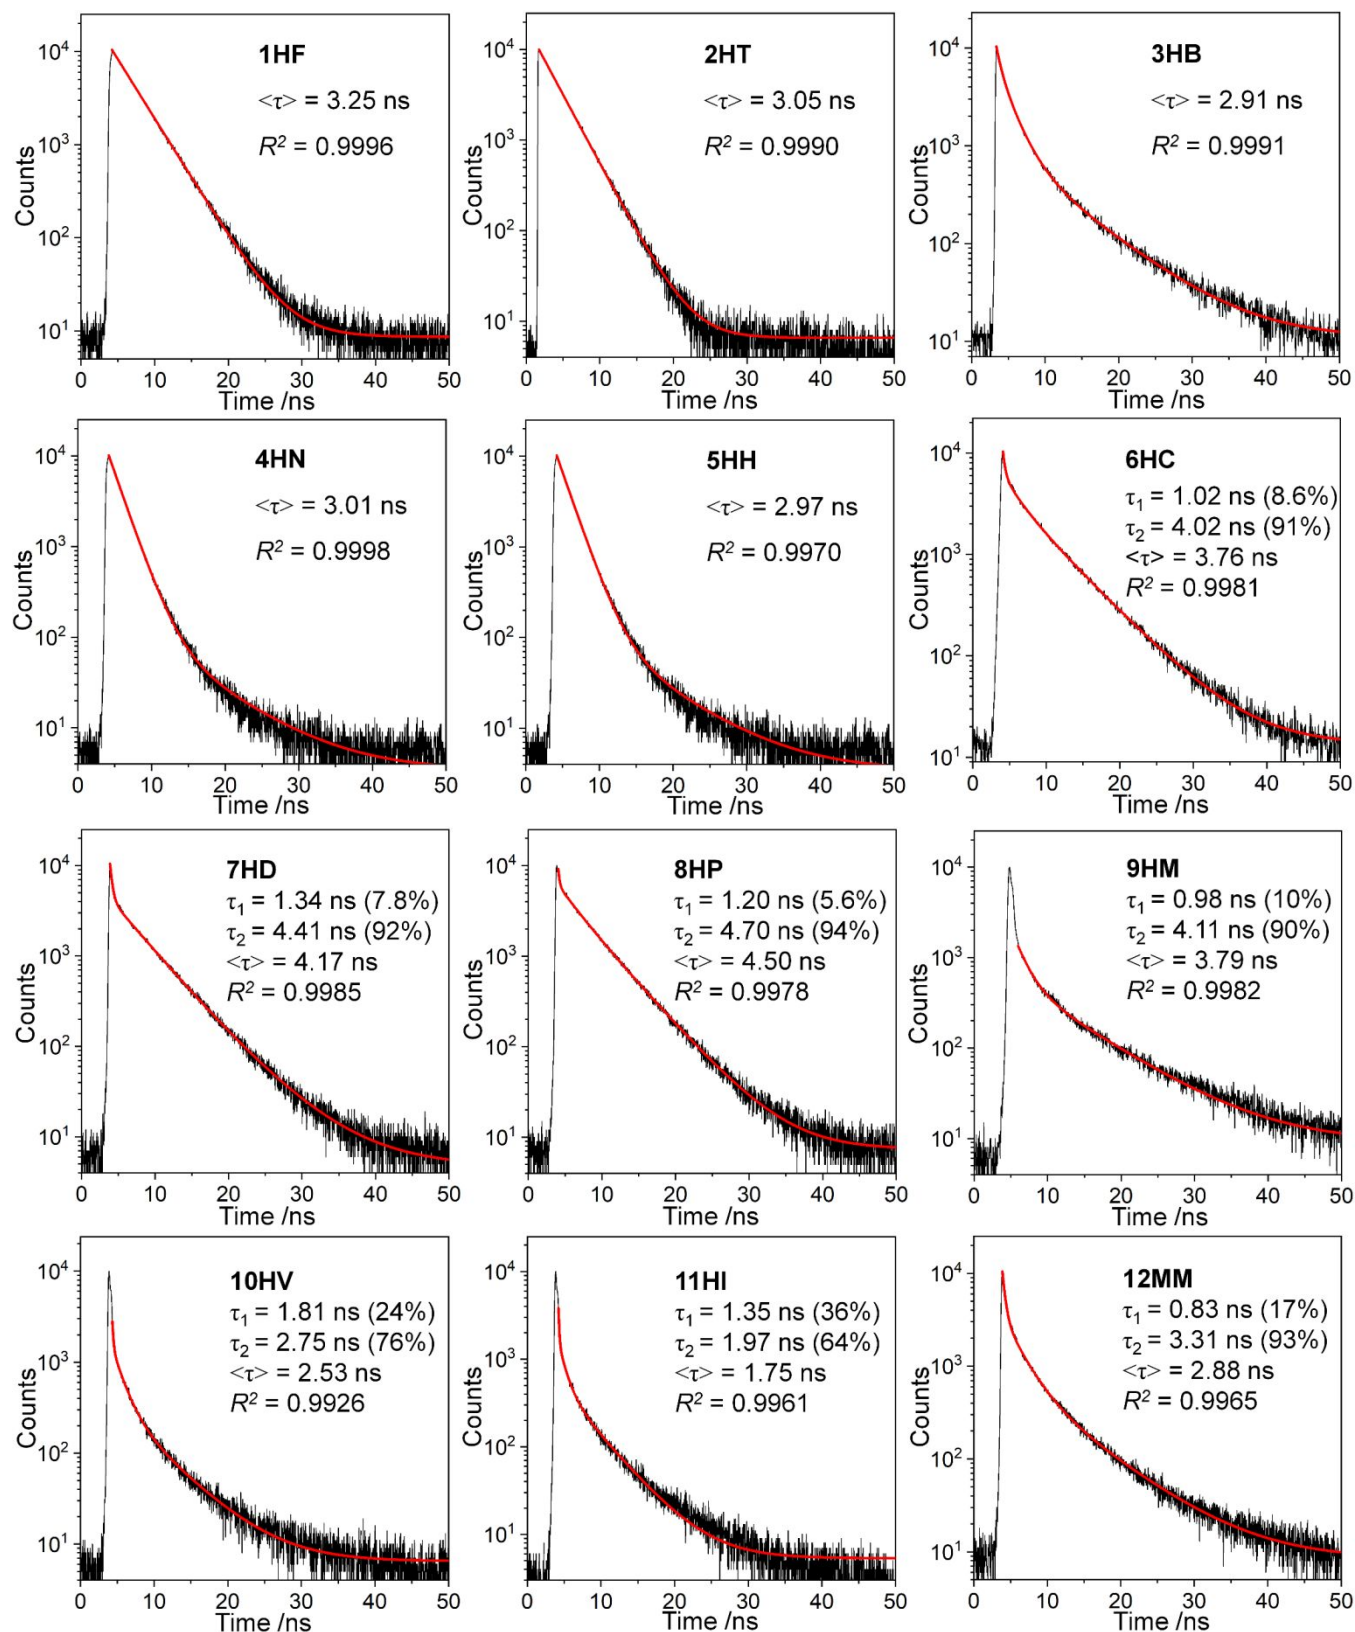

**Figure S44.** Emission decay curves of biphenyl-based *o*-carboranyl compounds **1HF–12MM** in the crystalline state detected at each intramolecular charge transfer (ICT)-based emission maxima at 298 K. Each red line is its exponential fitting curve for the decay curves.

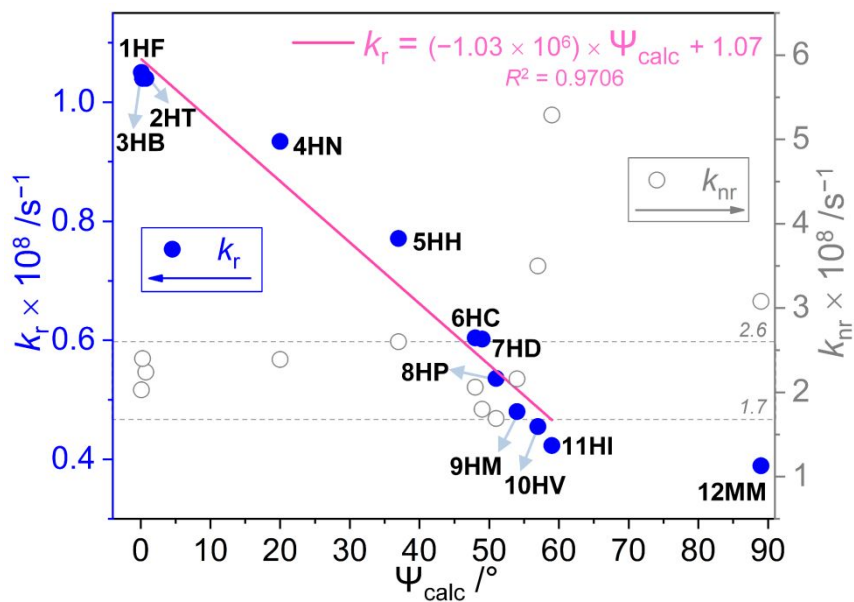

**Figure S45.** Radiative ( $k_r$ , filled blue circle, left) and nonradiative decay constants ( $k_{nr}$ , hollow gray circle, right) for biphenyl-based *o*-carboranyl compounds (**1HF–12MM**) in the crystalline state as a function of the calculated dihedral angles ( $\Psi_{\text{calc}}$ ) from each optimized structure in the ground ( $S_0$ ) state. The pink line is its linear fitting for the  $k_r$  values versus  $\Psi_{\text{calc}}$ .

**Table S4.** Computed emission wavelengths ( $\lambda_{\text{calc}}$ ), oscillator strengths ( $f_{\text{calc}}$ ), and molecular orbitals of HOMO and LUMO for **5HH** as a function of the dihedral angle ( $\Psi$ ) between biphenyl rings in each first excited ( $S_1$ ) state.

| $\Psi$ ( $^\circ$ )                 | 0                                                                                   | 5                                                                                   | 10                                                                                  | 15                                                                                  | 20                                                                                  | 25                                                                                   | 30                                                                                    | 35                                                                                    | 40                                                                                    | 45                                                                                  |
|-------------------------------------|-------------------------------------------------------------------------------------|-------------------------------------------------------------------------------------|-------------------------------------------------------------------------------------|-------------------------------------------------------------------------------------|-------------------------------------------------------------------------------------|--------------------------------------------------------------------------------------|---------------------------------------------------------------------------------------|---------------------------------------------------------------------------------------|---------------------------------------------------------------------------------------|-------------------------------------------------------------------------------------|
| $\lambda_{\text{calc}}/\text{nm}$   | 536.95                                                                              | 536.49                                                                              | 535.17                                                                              | 532.86                                                                              | 529.82                                                                              | 526.02                                                                               | 521.48                                                                                | 516.30                                                                                | 510.63                                                                                | 504.35                                                                              |
| $f_{\text{calc}}$                   | 0.5439                                                                              | 0.5426                                                                              | 0.5388                                                                              | 0.5324                                                                              | 0.5233                                                                              | 0.5120                                                                               | 0.4983                                                                                | 0.4824                                                                                | 0.4645                                                                                | 0.4445                                                                              |
| LUMO                                |    |    |    |    |    |    |    |    |    |  |
| HOMO                                |    |    |    |    |    |    |    |    |    |  |
| $\Psi$ ( $^\circ$ )                 | 50                                                                                  | 55                                                                                  | 60                                                                                  | 65                                                                                  | 70                                                                                  | 75                                                                                   | 80                                                                                    | 85                                                                                    | 90                                                                                    |                                                                                     |
| $\lambda_{\text{calc}} (\text{nm})$ | 497.59                                                                              | 490.35                                                                              | 482.55                                                                              | 474.29                                                                              | 465.73                                                                              | 456.77                                                                               | 447.42                                                                                | 437.80                                                                                | 430.11                                                                                |                                                                                     |
| $f_{\text{calc}}$                   | 0.4226                                                                              | 0.3989                                                                              | 0.3737                                                                              | 0.3473                                                                              | 0.3199                                                                              | 0.2921                                                                               | 0.2645                                                                                | 0.2390                                                                                | 0.2181                                                                                |                                                                                     |
| LUMO                                |  |  |  |  |  |  |  |  |  |                                                                                     |
| HOMO                                |  |  |  |  |  |  |  |  |  |                                                                                     |

Theoretical calculation details for biphenyl-based *o*-carboranyl compounds

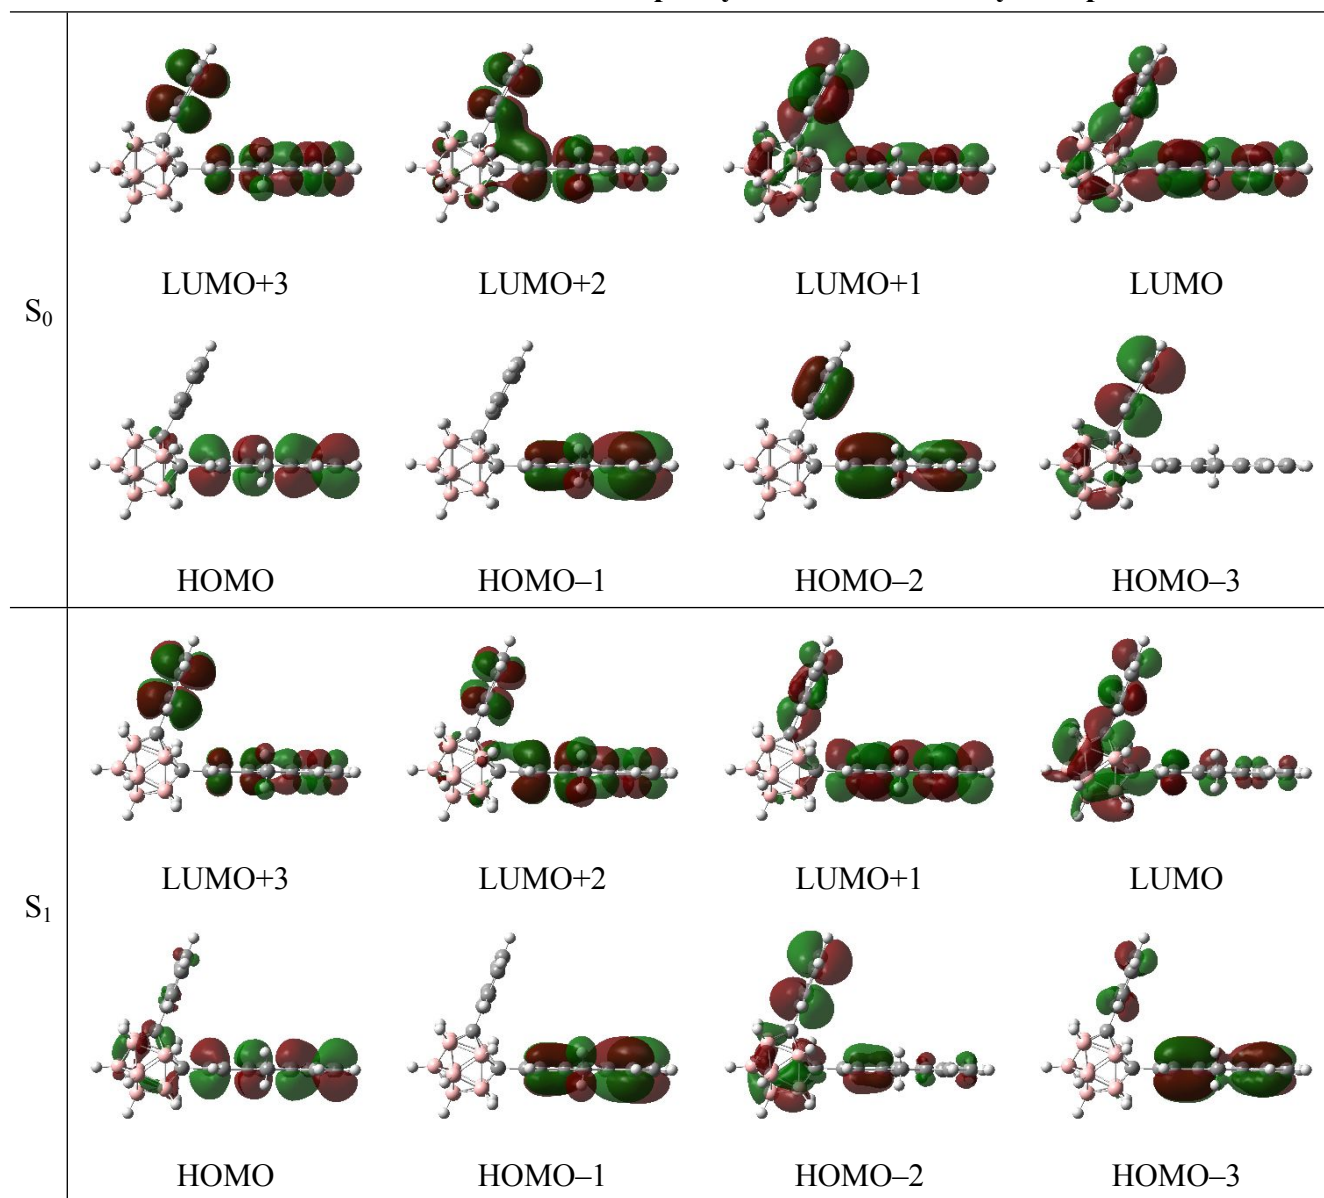

**Figure S46.** The selected frontier orbitals of **1HF** from B3LYP calculations (Isovalue = 0.04 a.u.) at their ground state (S<sub>0</sub>) and the first excited state (S<sub>1</sub>) fully optimized geometries in THF.

**Table S5.** Computed absorption wavelengths ( $\lambda_{\text{calc}}$  in nm) and oscillator strengths ( $f_{\text{calc.}}$ ) for **1HF** from TD-B3LYP calculations using the B3LYP geometries at their ground state ( $S_0$ ) and the first excited state ( $S_1$ ) fully optimized geometries in THF

| state | $\lambda_{\text{calc}}$ /nm | $f_{\text{calc}}$ | Major contribution                                                                                  |
|-------|-----------------------------|-------------------|-----------------------------------------------------------------------------------------------------|
| $S_0$ |                             |                   |                                                                                                     |
| 1     | 300.99                      | 0.6914            | HOMO → LUMO (97.60%)                                                                                |
| 2     | 271.02                      | 0.0327            | HOMO-2 → LUMO (23.91%)<br>HOMO-1 → LUMO (8.36%)<br>HOMO → LUMO+1 (19.32%)<br>HOMO → LUMO+2 (36.86%) |
| 3     | 268.26                      | 0.0424            | HOMO-1 → LUMO (65.44%)<br>HOMO → LUMO+1 (18.88%)<br>HOMO → LUMO+5 (7.46%)                           |
| 4     | 264.61                      | 0.1649            | HOMO-1 → LUMO (8.55%)<br>HOMO → LUMO+1 (58.97%)<br>HOMO → LUMO+2 (18.48%)                           |
| 5     | 248.98                      | 0.0084            | HOMO-5 → LUMO (52.90%)<br>HOMO-2 → LUMO+1 (25.58%)                                                  |
| $S_1$ |                             |                   |                                                                                                     |
| 1     | 503.44                      | 0.6023            | HOMO → LUMO (99.53%)                                                                                |
| 2     | 407.72                      | 0.0081            | HOMO-3 → LUMO (16.34%)<br>HOMO-1 → LUMO (79.96%)                                                    |
| 3     | 380.43                      | 0.3599            | HOMO-2 → LUMO (90.19%)                                                                              |
| 4     | 379.40                      | 0.0070            | HOMO-3 → LUMO (96.71%)                                                                              |
| 5     | 376.65                      | 0.1325            | HOMO-4 → LUMO (80.26%)                                                                              |

**Table S6.** Molecular orbital distributions (in %) and energies (in eV) of **1HF** at their ground state ( $S_0$ ) and the first excited state ( $S_1$ ) fully optimized geometries in THF

|        | E (eV) | car-phenyl | carborane | bridged phenyl | terminal phenyl |
|--------|--------|------------|-----------|----------------|-----------------|
| $S_0$  |        |            |           |                |                 |
| LUMO+3 | -0.38  | 60.7       | 2.40      | 10.2           | 26.7            |
| LUMO+2 | -0.72  | 27.9       | 7.44      | 47.1           | 17.6            |
| LUMO+1 | -1.02  | 57.0       | 18.0      | 12.9           | 12.1            |
| LUMO   | -1.56  | 10.3       | 25.4      | 41.0           | 23.3            |
| HOMO   | -6.14  | 0.16       | 4.29      | 43.8           | 51.8            |
| HOMO-1 | -6.80  | 0.56       | 0.20      | 18.9           | 80.3            |
| HOMO-2 | -7.08  | 18.5       | 0.85      | 59.5           | 21.1            |
| HOMO-3 | -7.16  | 85.9       | 13.5      | 0.27           | 0.32            |
| $S_1$  |        |            |           |                |                 |
| LUMO+3 | -0.47  | 75.4       | 3.00      | 9.30           | 12.2            |
| LUMO+2 | -0.61  | 18.7       | 5.68      | 45.9           | 29.7            |
| LUMO+1 | -1.20  | 8.85       | 5.16      | 42.4           | 43.6            |
| LUMO   | -3.37  | 14.9       | 72.0      | 9.84           | 3.29            |
| HOMO   | -5.96  | 1.75       | 7.71      | 43.9           | 46.6            |
| HOMO-1 | -6.89  | 0.02       | 0.48      | 29.1           | 70.4            |
| HOMO-2 | -7.14  | 72.4       | 21.0      | 3.44           | 3.13            |
| HOMO-3 | -7.17  | 2.02       | 2.04      | 62.4           | 33.6            |

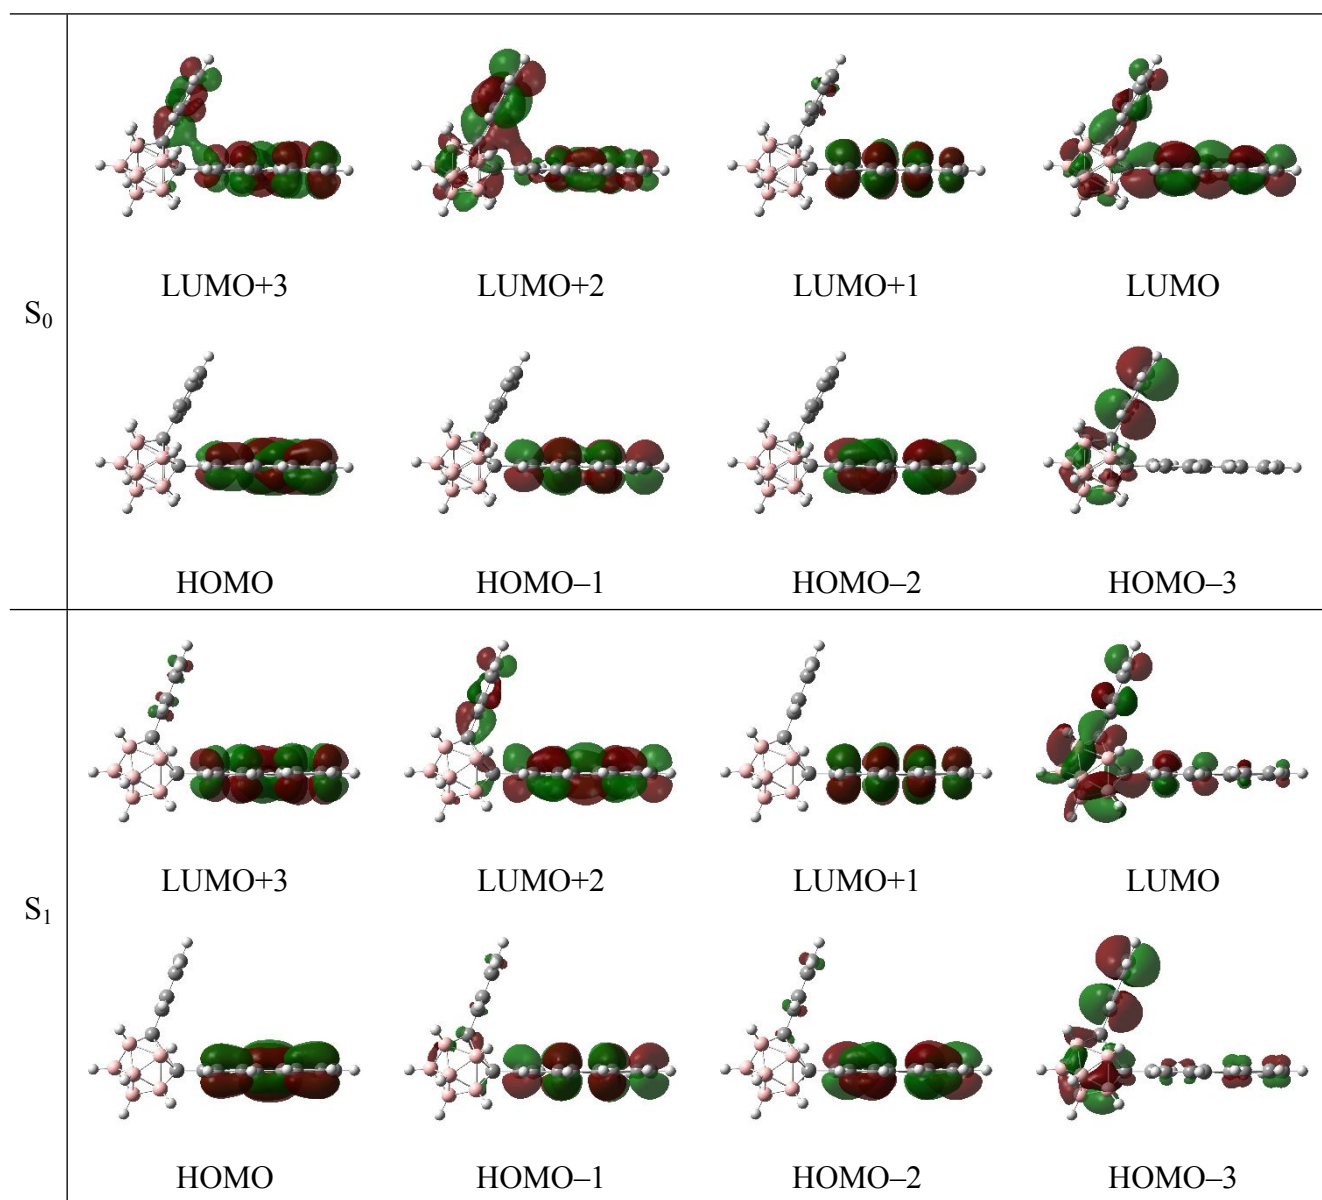

**Figure S47.** The selected frontier orbitals of **2HT** from B3LYP calculations (Isovalue = 0.04 a.u.) at their ground state (S<sub>0</sub>) and the first excited state (S<sub>1</sub>) fully optimized geometries in THF.

**Table S7.** Computed absorption wavelengths ( $\lambda_{\text{calc}}$  in nm) and oscillator strengths ( $f_{\text{calc}}$ ) for **2HT** from TD-B3LYP calculations using the B3LYP geometries at their ground state ( $S_0$ ) and the first excited state ( $S_1$ ) fully optimized geometries in THF

| state | $\lambda_{\text{calc}}$ (nm) | $f_{\text{calc}}$ | Major contribution                                                                                                                 |
|-------|------------------------------|-------------------|------------------------------------------------------------------------------------------------------------------------------------|
| $S_0$ |                              |                   |                                                                                                                                    |
| 1     | 322.78                       | 0.2147            | HOMO-1 → LUMO (7.12%)<br>HOMO-1 → LUMO+1 (19.44%)<br>HOMO → LUMO (65.18%)                                                          |
| 2     | 311.81                       | 0.1706            | HOMO-1 → LUMO (68.80%)<br>HOMO → LUMO (12.33%)<br>HOMO → LUMO+1 (16.82%)                                                           |
| 3     | 288.79                       | 0.1135            | HOMO-1 → LUMO (12.01%)<br>HOMO → LUMO+1 (32.13%)<br>HOMO → LUMO+2 (10.01%)<br>HOMO → LUMO+3 (12.57%)                               |
| 4     | 287.40                       | 0.0439            | HOMO-2 → LUMO (32.41%)<br>HOMO-1 → LUMO+1 (26.57%)<br>HOMO-1 → LUMO+3 (12.57%)                                                     |
| 5     | 277.84                       | 0.4812            | HOMO-2 → LUMO (24.13%)<br>HOMO-1 → LUMO+1 (13.63%)<br>HOMO-1 → LUMO+3 (11.03%)<br>HOMO → LUMO+1 (15.96%)<br>HOMO → LUMO+2 (18.21%) |
| $S_1$ |                              |                   |                                                                                                                                    |
| 1     | 512.28                       | 0.4652            | HOMO → LUMO (98.44%)                                                                                                               |
| 2     | 483.35                       | 0.1368            | HOMO-1 → LUMO (98.94%)                                                                                                             |
| 3     | 456.30                       | 0.1514            | HOMO-2 → LUMO (98.01%)                                                                                                             |
| 4     | 398.35                       | 0.0054            | HOMO-3 → LUMO (98.07%)                                                                                                             |
| 5     | 393.43                       | 0.4442            | HOMO-4 → LUMO (98.45%)                                                                                                             |



**Table S8.** Molecular orbital distributions (in %) and energies (in eV) of **2HT** at their ground state ( $S_0$ ) and the first excited state ( $S_1$ ) fully optimized geometries in THF

|        | E (eV) | car-phenyl | carborane | bridged phenyl | terminal phenyl |
|--------|--------|------------|-----------|----------------|-----------------|
| $S_0$  |        |            |           |                |                 |
| LUMO+3 | -1.00  | 28.2       | 9.08      | 14.4           | 48.2            |
| LUMO+2 | -1.08  | 33.0       | 13.2      | 7.26           | 46.5            |
| LUMO+1 | -1.29  | 2.11       | 2.22      | 41.6           | 54.0            |
| LUMO   | -1.65  | 6.83       | 21.4      | 42.0           | 29.7            |
| HOMO   | -6.15  | 0.12       | 0.64      | 18.0           | 81.2            |
| HOMO-1 | -6.19  | 0.09       | 2.35      | 38.0           | 59.5            |
| HOMO-2 | -6.69  | 0.63       | 1.62      | 33.1           | 64.6            |
| HOMO-3 | -7.17  | 86.2       | 13.1      | 0.24           | 0.34            |
| $S_1$  |        |            |           |                |                 |
| LUMO+3 | -1.01  | 2.44       | 1.74      | 27.0           | 68.8            |
| LUMO+2 | -1.20  | 6.81       | 4.05      | 34.0           | 55.1            |
| LUMO+1 | -1.43  | 0.10       | 1.24      | 35.5           | 63.1            |
| LUMO   | -3.51  | 13.1       | 74.6      | 9.77           | 2.57            |
| HOMO   | -5.99  | 0.00       | 0.26      | 25.6           | 74.1            |
| HOMO-1 | -6.23  | 1.40       | 4.63      | 31.0           | 63.0            |
| HOMO-2 | -6.69  | 1.90       | 2.85      | 33.9           | 61.3            |
| HOMO-3 | -7.17  | 74.6       | 20.0      | 1.30           | 4.11            |

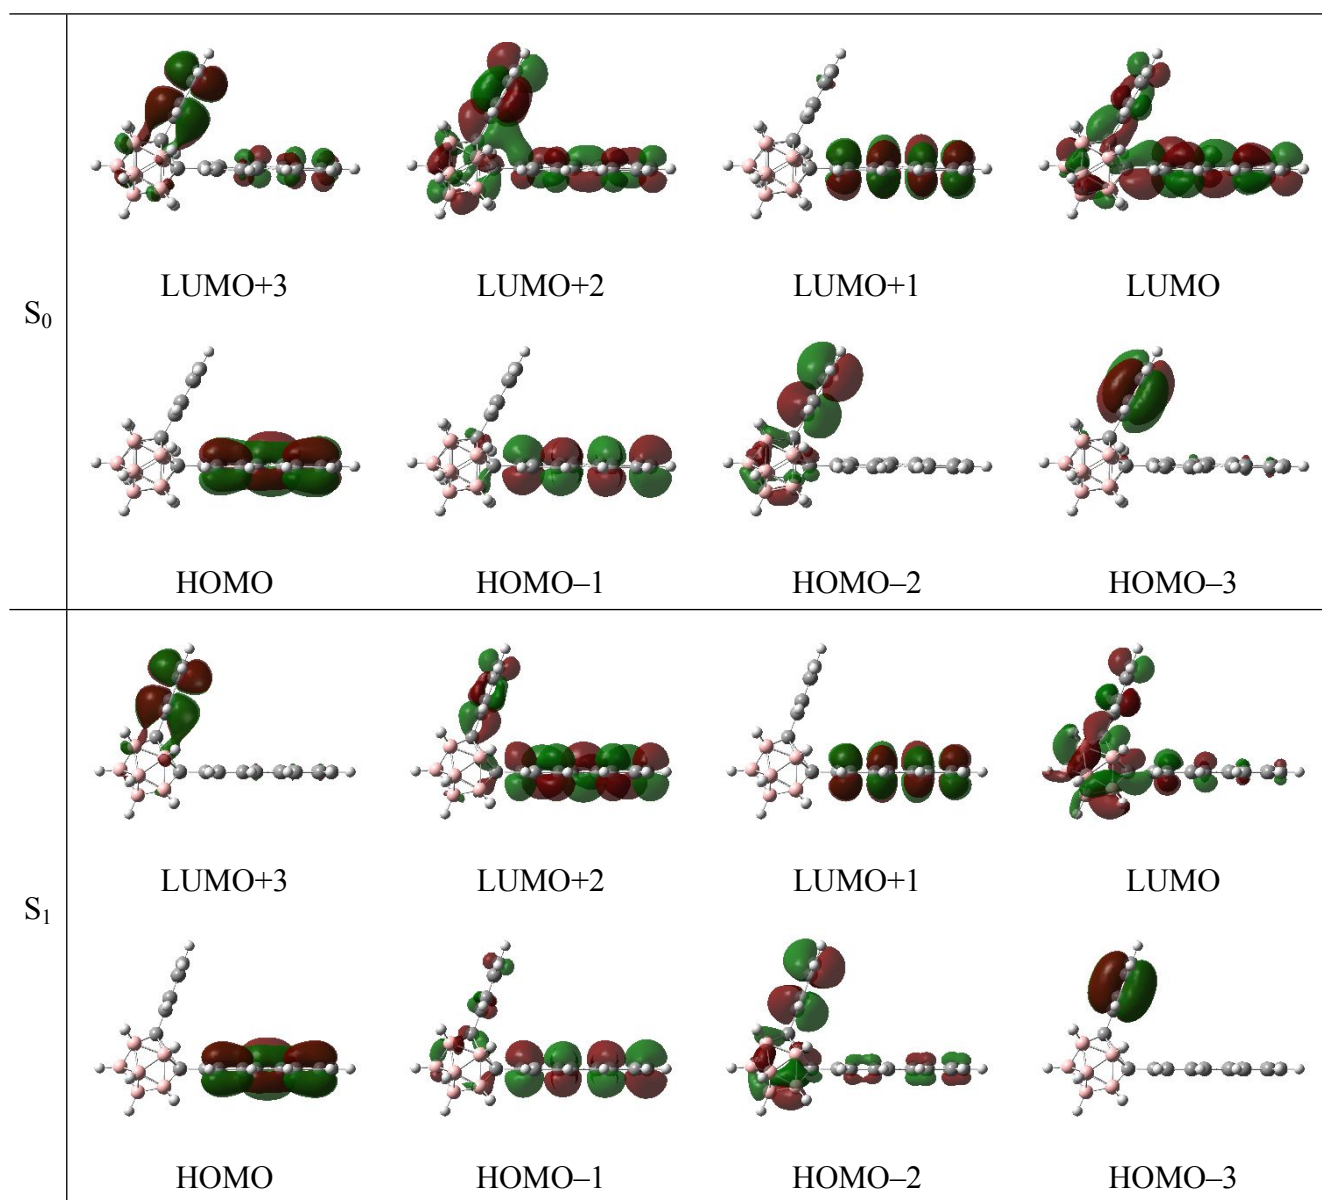

**Figure S48.** The selected frontier orbitals of **3HB** from B3LYP calculations (Isovalue = 0.04 a.u.) at their ground state (S<sub>0</sub>) and the first excited state (S<sub>1</sub>) fully optimized geometries in THF.

**Table S9.** Computed absorption wavelengths ( $\lambda_{\text{calc}}$  in nm) and oscillator strengths ( $f_{\text{calc}}$ ) for **3HB** from TD-B3LYP calculations using the B3LYP geometries at their ground state ( $S_0$ ) and the first excited state ( $S_1$ ) fully optimized geometries in THF

| state | $\lambda_{\text{calc}}$ (nm) | $f_{\text{calc}}$ | Major contribution                                                         |
|-------|------------------------------|-------------------|----------------------------------------------------------------------------|
| $S_0$ |                              |                   |                                                                            |
| 1     | 315.41                       | 0.1124            | HOMO-1 → LUMO+1 (17.29%)<br>HOMO → LUMO (79.66%)                           |
| 2     | 300.26                       | 0.0005            | HOMO-1 → LUMO (44.01%)<br>HOMO → LUMO+1 (53.32%)                           |
| 3     | 280.78                       | 0.0420            | HOMO-1 → LUMO+1 (22.22%)<br>HOMO → LUMO (10.73%)<br>HOMO → LUMO+2 (55.93%) |
| 4     | 276.63                       | 1.1067            | HOMO-1 → LUMO (48.89%)<br>HOMO → LUMO+1 (32.60%)                           |
| 5     | 263.74                       | 0.1057            | HOMO-1 → LUMO+1 (50.22%)<br>HOMO → LUMO+2 (34.80%)                         |
| $S_1$ |                              |                   |                                                                            |
| 1     | 518.77                       | 0.5041            | HOMO → LUMO (99.33%)                                                       |
| 2     | 408.23                       | 0.1423            | HOMO-1 → LUMO (98.74%)                                                     |
| 3     | 398.13                       | 0.0056            | HOMO-2 → LUMO (97.73%)                                                     |
| 4     | 393.09                       | 0.4359            | HOMO-3 → LUMO (98.27%)                                                     |
| 5     | 375.01                       | 0.0048            | HOMO-5 → LUMO (11.11%)<br>HOMO-4 → LUMO (86.31%)                           |

**Table S10.** Molecular orbital distributions (in %) and energies (in eV) of **3HB** at their ground state ( $S_0$ ) and the first excited state ( $S_1$ ) fully optimized geometries in THF

|        | E (eV) | car-phenyl | carborane | bridged phenyl | terminal phenyl |
|--------|--------|------------|-----------|----------------|-----------------|
| $S_0$  |        |            |           |                |                 |
| LUMO+3 | -0.51  | 82.1       | 6.83      | 2.42           | 8.66            |
| LUMO+2 | -1.04  | 59.7       | 19.9      | 9.79           | 10.7            |
| LUMO+1 | -1.35  | 1.09       | 2.07      | 36.2           | 60.7            |
| LUMO   | -1.62  | 8.60       | 22.6      | 42.4           | 26.3            |
| HOMO   | -6.05  | 0.14       | 0.27      | 30.7           | 68.8            |
| HOMO-1 | -6.40  | 0.15       | 4.38      | 43.2           | 52.3            |
| HOMO-2 | -7.17  | 86.1       | 13.1      | 0.39           | 0.46            |
| HOMO-3 | -7.19  | 95.1       | 1.32      | 1.47           | 2.13            |
| $S_1$  |        |            |           |                |                 |
| LUMO+3 | -0.52  | 93.1       | 5.69      | 0.34           | 0.90            |
| LUMO+2 | -1.12  | 9.50       | 4.75      | 42.4           | 43.4            |
| LUMO+1 | -1.52  | 0.09       | 1.19      | 35.5           | 63.2            |
| LUMO   | -3.51  | 13.3       | 75.0      | 9.27           | 2.45            |
| HOMO   | -5.86  | 0.00       | 0.32      | 32.0           | 67.7            |
| HOMO-1 | -6.48  | 3.17       | 7.43      | 42.4           | 47.0            |
| HOMO-2 | -7.17  | 73.9       | 20.0      | 1.62           | 4.48            |
| HOMO-3 | -7.25  | 97.0       | 3.02      | 0.02           | 0.00            |

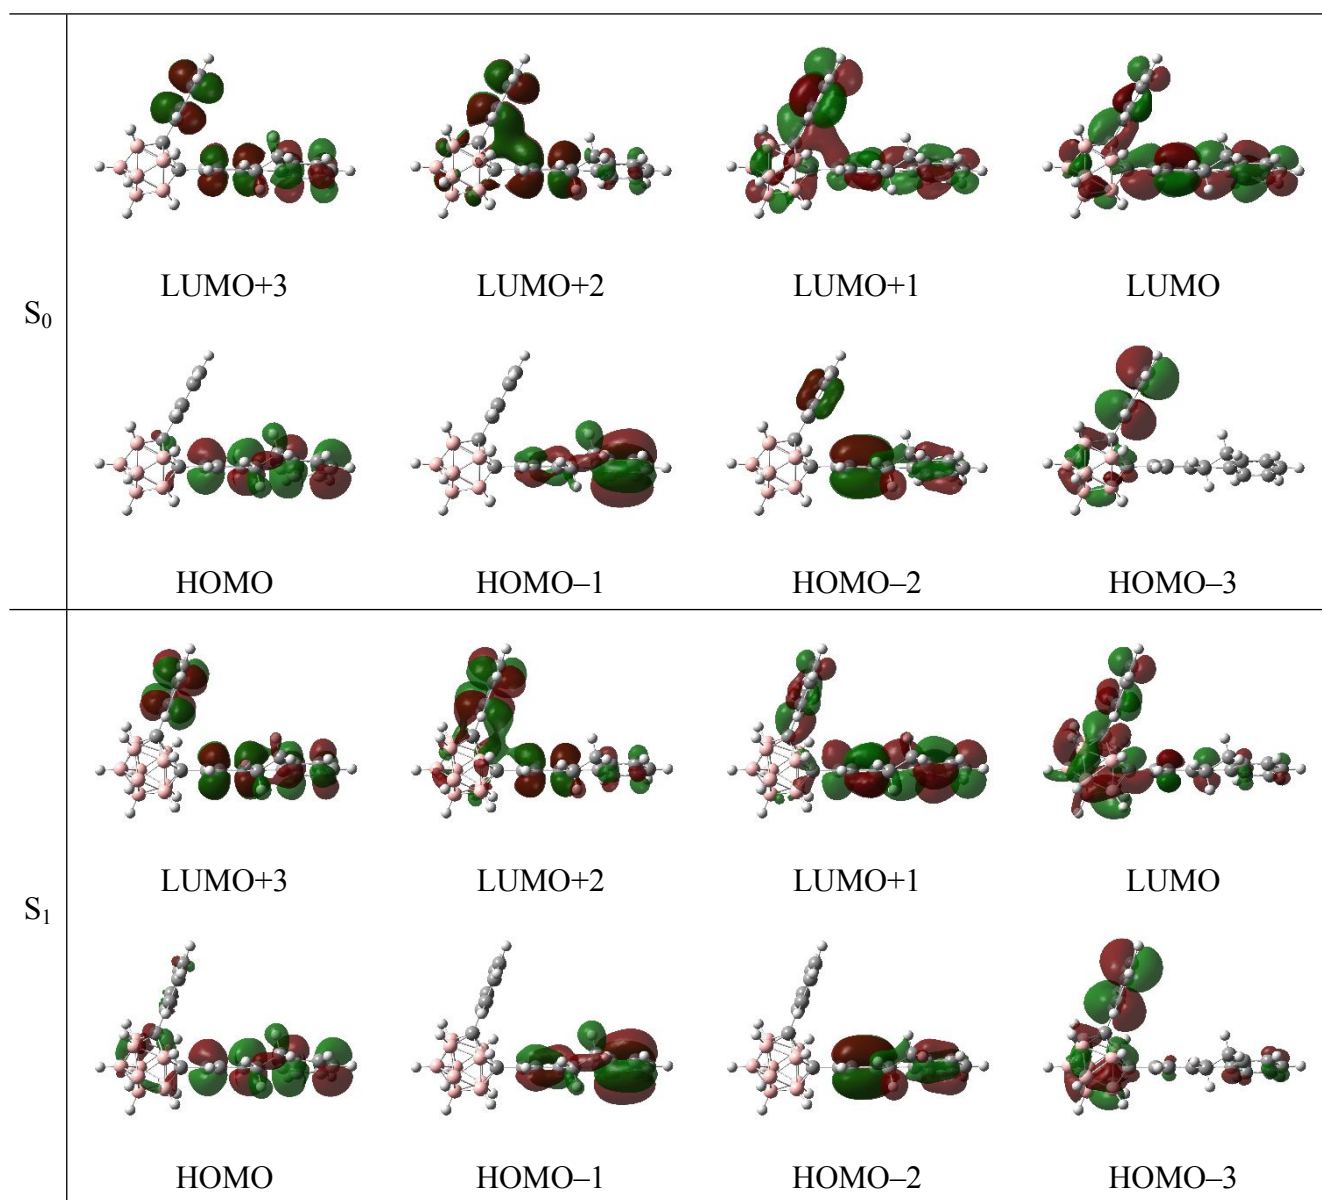

**Figure S49.** The selected frontier orbitals of **4HN** from B3LYP calculations (Isovalue = 0.04 a.u.) at their ground state (S<sub>0</sub>) and the first excited state (S<sub>1</sub>) fully optimized geometries in THF.

**Table S11.** Computed absorption wavelengths ( $\lambda_{\text{calc}}$  in nm) and oscillator strengths ( $f_{\text{calc}}$ ) for **4HN** from TD-B3LYP calculations using the B3LYP geometries at their ground state ( $S_0$ ) and the first excited state ( $S_1$ ) fully optimized geometries in THF

| state | $\lambda_{\text{calc}}$ (nm) | $f_{\text{calc}}$ | Major contribution     |
|-------|------------------------------|-------------------|------------------------|
| $S_0$ |                              |                   |                        |
| 1     | 307.23                       | 0.6218            | HOMO → LUMO (97.65%)   |
| 2     | 275.95                       | 0.0097            | HOMO-2 → LUMO (9.91%)  |
|       |                              |                   | HOMO-1 → LUMO (48.83%) |
|       |                              |                   | HOMO → LUMO+1 (14.02%) |
|       |                              |                   | HOMO → LUMO+2 (14.58%) |
| 3     | 268.37                       | 0.1269            | HOMO-2 → LUMO (14.96%) |
|       |                              |                   | HOMO → LUMO+1 (71.18%) |
|       |                              |                   | HOMO → LUMO+2 (9.28%)  |
| 4     | 267.26                       | 0.0589            | HOMO-2 → LUMO (35.28%) |
|       |                              |                   | HOMO-1 → LUMO (30.87%) |
|       |                              |                   | HOMO → LUMO+1 (13.15%) |
| 5     | 250.51                       | 0.0199            | HOMO-4 → LUMO (62.32%) |
|       |                              |                   | HOMO-2 → LUMO (11.26%) |
|       |                              |                   | HOMO → LUMO+2 (8.55%)  |
| $S_1$ |                              |                   |                        |
| 1     | 503.25                       | 0.5003            | HOMO → LUMO (99.44%)   |
| 2     | 415.17                       | 0.0378            | HOMO-2 → LUMO (40.36%) |
|       |                              |                   | HOMO-1 → LUMO (58.78%) |
| 3     | 395.68                       | 0.0188            | HOMO-2 → LUMO (58.70%) |
|       |                              |                   | HOMO-1 → LUMO (39.88%) |
| 4     | 381.37                       | 0.0480            | HOMO-4 → LUMO (10.01%) |
|       |                              |                   | HOMO-3 → LUMO (87.18%) |
| 5     | 380.59                       | 0.4209            | HOMO-4 → LUMO (87.64%) |
|       |                              |                   | HOMO-3 → LUMO (10.05%) |

**Table S12.** Molecular orbital distributions (in %) and energies (in eV) of **4HN** at their ground state ( $S_0$ ) and the first excited state ( $S_1$ ) fully optimized geometries in THF

|        | E (eV) | car-phenyl | carborane | bridged phenyl | terminal phenyl |
|--------|--------|------------|-----------|----------------|-----------------|
| $S_0$  |        |            |           |                |                 |
| LUMO+3 | -0.33  | 44.3       | 1.08      | 26.2           | 28.4            |
| LUMO+2 | -0.68  | 44.2       | 8.65      | 40.8           | 6.27            |
| LUMO+1 | -1.04  | 58.3       | 18.9      | 11.2           | 11.6            |
| LUMO   | -1.61  | 9.09       | 24.3      | 43.1           | 23.5            |
| HOMO   | -6.13  | 0.15       | 3.80      | 43.5           | 52.6            |
| HOMO-1 | -6.77  | 0.26       | 0.35      | 10.4           | 89.0            |
| HOMO-2 | -6.99  | 6.76       | 0.87      | 81.8           | 10.6            |
| HOMO-3 | -7.16  | 85.8       | 13.6      | 0.22           | 0.33            |
| $S_1$  |        |            |           |                |                 |
| LUMO+3 | -0.43  | 26.8       | 1.34      | 44.9           | 27.0            |
| LUMO+2 | -0.56  | 67.2       | 7.64      | 19.3           | 5.83            |
| LUMO+1 | -1.29  | 7.80       | 5.46      | 43.1           | 43.6            |
| LUMO   | -3.39  | 14.7       | 72.1      | 10.1           | 3.13            |
| HOMO   | -5.93  | 1.50       | 6.87      | 44.1           | 47.6            |
| HOMO-1 | -6.85  | 1.19       | 1.06      | 21.6           | 76.1            |
| HOMO-2 | -7.05  | 0.02       | 1.18      | 76.6           | 22.2            |
| HOMO-3 | -7.15  | 73.3       | 21.1      | 1.16           | 4.52            |

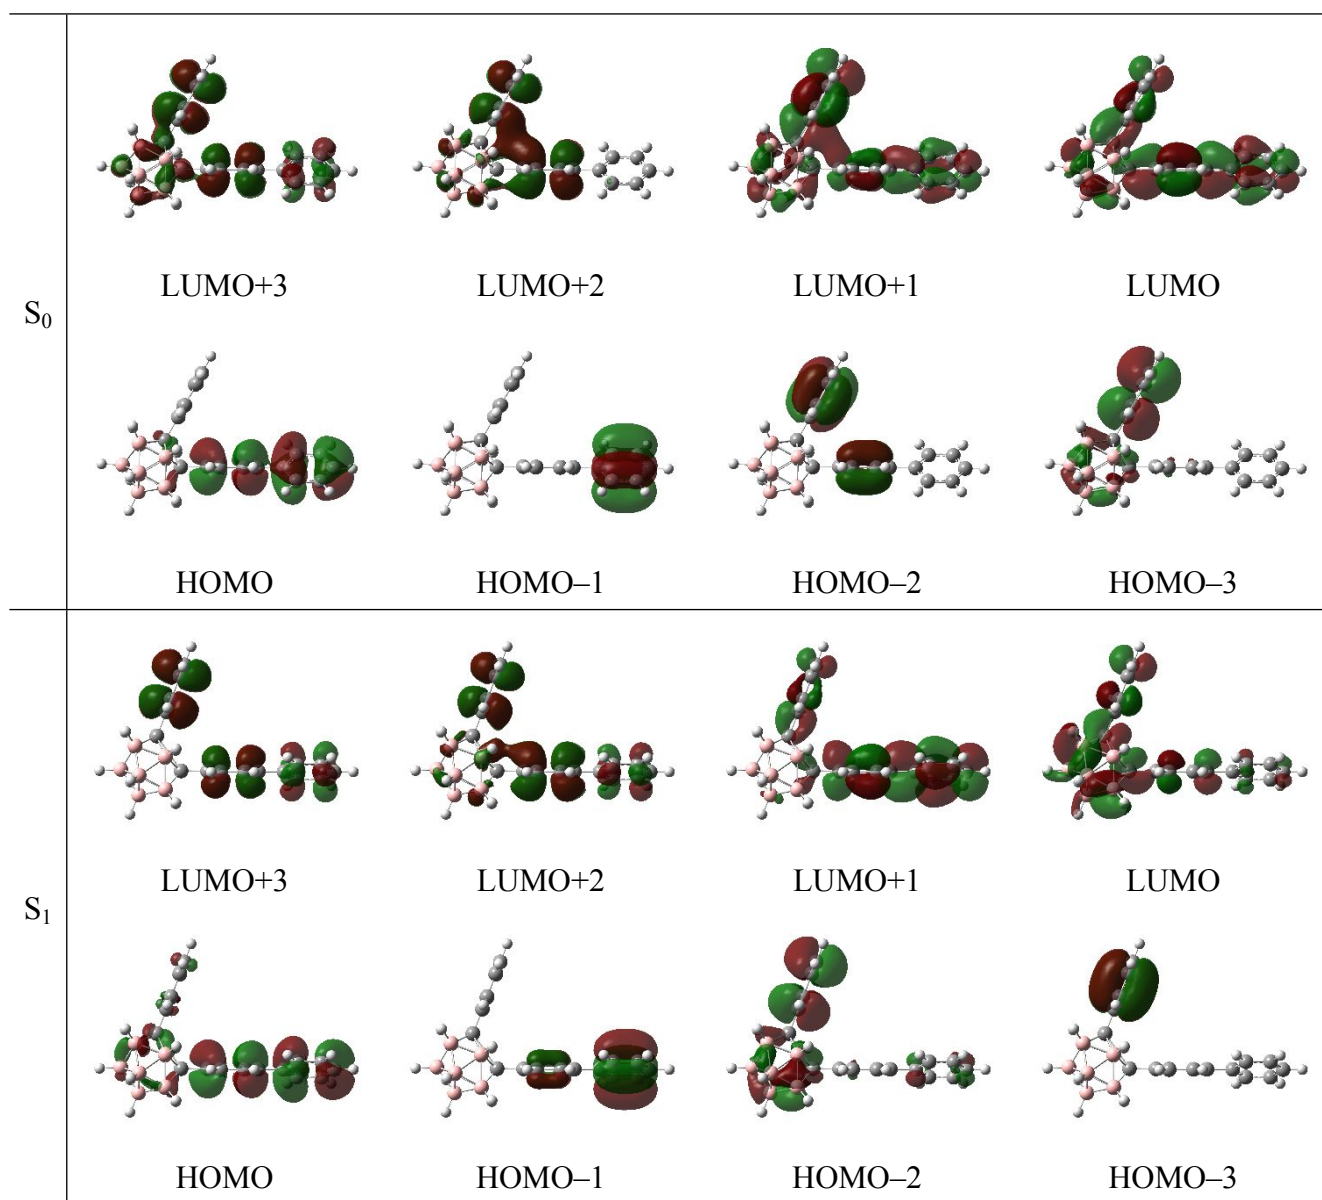

**Figure S50.** The selected frontier orbitals of **5HH** from B3LYP calculations (Isovalue = 0.04 a.u.) at their ground state (S<sub>0</sub>) and the first excited state (S<sub>1</sub>) fully optimized geometries in THF.



**Table S13.** Computed absorption wavelengths ( $\lambda_{\text{calc}}$  in nm) and oscillator strengths ( $f_{\text{calc}}$ ) for **5HH** from TD-B3LYP calculations using the B3LYP geometries at their ground state ( $S_0$ ) and the first excited state ( $S_1$ ) fully optimized geometries in THF

| state | $\lambda_{\text{calc}}$ (nm) | $f_{\text{calc}}$ | Major contribution                                                                                                            |
|-------|------------------------------|-------------------|-------------------------------------------------------------------------------------------------------------------------------|
| $S_0$ |                              |                   |                                                                                                                               |
| 1     | 284.29                       | 0.6805            | HOMO → LUMO (98.21%)                                                                                                          |
| 2     | 259.43                       | 0.0015            | HOMO-4 → LUMO (16.45%)<br>HOMO-2 → LUMO (22.99%)<br>HOMO-1 → LUMO (17.62%)<br>HOMO → LUMO+2 (28.06%)<br>HOMO → LUMO+3 (7.33%) |
| 3     | 257.22                       | 0.0007            | HOMO-2 → LUMO (9.04%)<br>HOMO-1 → LUMO (60.33%)<br>HOMO → LUMO+5 (12.72%)                                                     |
| 4     | 252.49                       | 0.1835            | HOMO → LUMO+1 (95.30%)                                                                                                        |
| 5     | 248.13                       | 0.0070            | HOMO-4 → LUMO (34.84%)<br>HOMO-3 → LUMO+2 (6.20%)<br>HOMO-2 → LUMO (43.00%)                                                   |
| $S_1$ |                              |                   |                                                                                                                               |
| 1     | 528.60                       | 0.5244            | HOMO → LUMO (99.33%)                                                                                                          |
| 2     | 385.33                       | 0.0007            | HOMO-4 → LUMO (43.86%)<br>HOMO-1 → LUMO (53.93%)                                                                              |
| 3     | 383.40                       | 0.0104            | HOMO-2 → LUMO (95.62%)                                                                                                        |
| 4     | 382.89                       | 0.2365            | HOMO-3 → LUMO (97.77%)                                                                                                        |
| 5     | 370.61                       | 0.0055            | HOMO-4 → LUMO (53.84%)<br>HOMO-1 → LUMO (43.50%)                                                                              |

**Table S14.** Molecular orbital distributions (in %) and energies (in eV) of **5HH** at their ground state ( $S_0$ ) and the first excited state ( $S_1$ ) fully optimized geometries in THF

|        | E (eV) | car-phenyl | carborane | bridged phenyl | terminal phenyl |
|--------|--------|------------|-----------|----------------|-----------------|
| $S_0$  |        |            |           |                |                 |
| LUMO+3 | -0.32  | 46.4       | 1.31      | 33.6           | 18.7            |
| LUMO+2 | -0.71  | 41.3       | 9.11      | 48.0           | 1.60            |
| LUMO+1 | -1.01  | 57.0       | 17.2      | 13.7           | 12.1            |
| LUMO   | -1.55  | 11.4       | 26.8      | 43.0           | 18.8            |
| HOMO   | -6.40  | 0.18       | 4.24      | 41.9           | 53.7            |
| HOMO-1 | -6.99  | 0.03       | 0.02      | 0.52           | 99.4            |
| HOMO-2 | -7.15  | 78.5       | 10.8      | 10.3           | 0.39            |
| HOMO-3 | -7.17  | 61.5       | 3.47      | 34.6           | 0.35            |
| $S_1$  |        |            |           |                |                 |
| LUMO+3 | -0.46  | 49.4       | 1.50      | 29.3           | 19.8            |
| LUMO+2 | -0.60  | 44.1       | 7.92      | 36.1           | 11.9            |
| LUMO+1 | -1.32  | 7.95       | 5.57      | 43.0           | 43.5            |
| LUMO   | -3.54  | 14.5       | 71.8      | 10.6           | 3.04            |
| HOMO   | -5.89  | 2.03       | 7.66      | 43.7           | 46.6            |
| HOMO-1 | -7.10  | 73.6       | 21.1      | 1.12           | 4.27            |
| HOMO-2 | -7.16  | 0.41       | 0.44      | 14.7           | 84.5            |
| HOMO-3 | -7.27  | 0.02       | 2.35      | 82.6           | 15.0            |

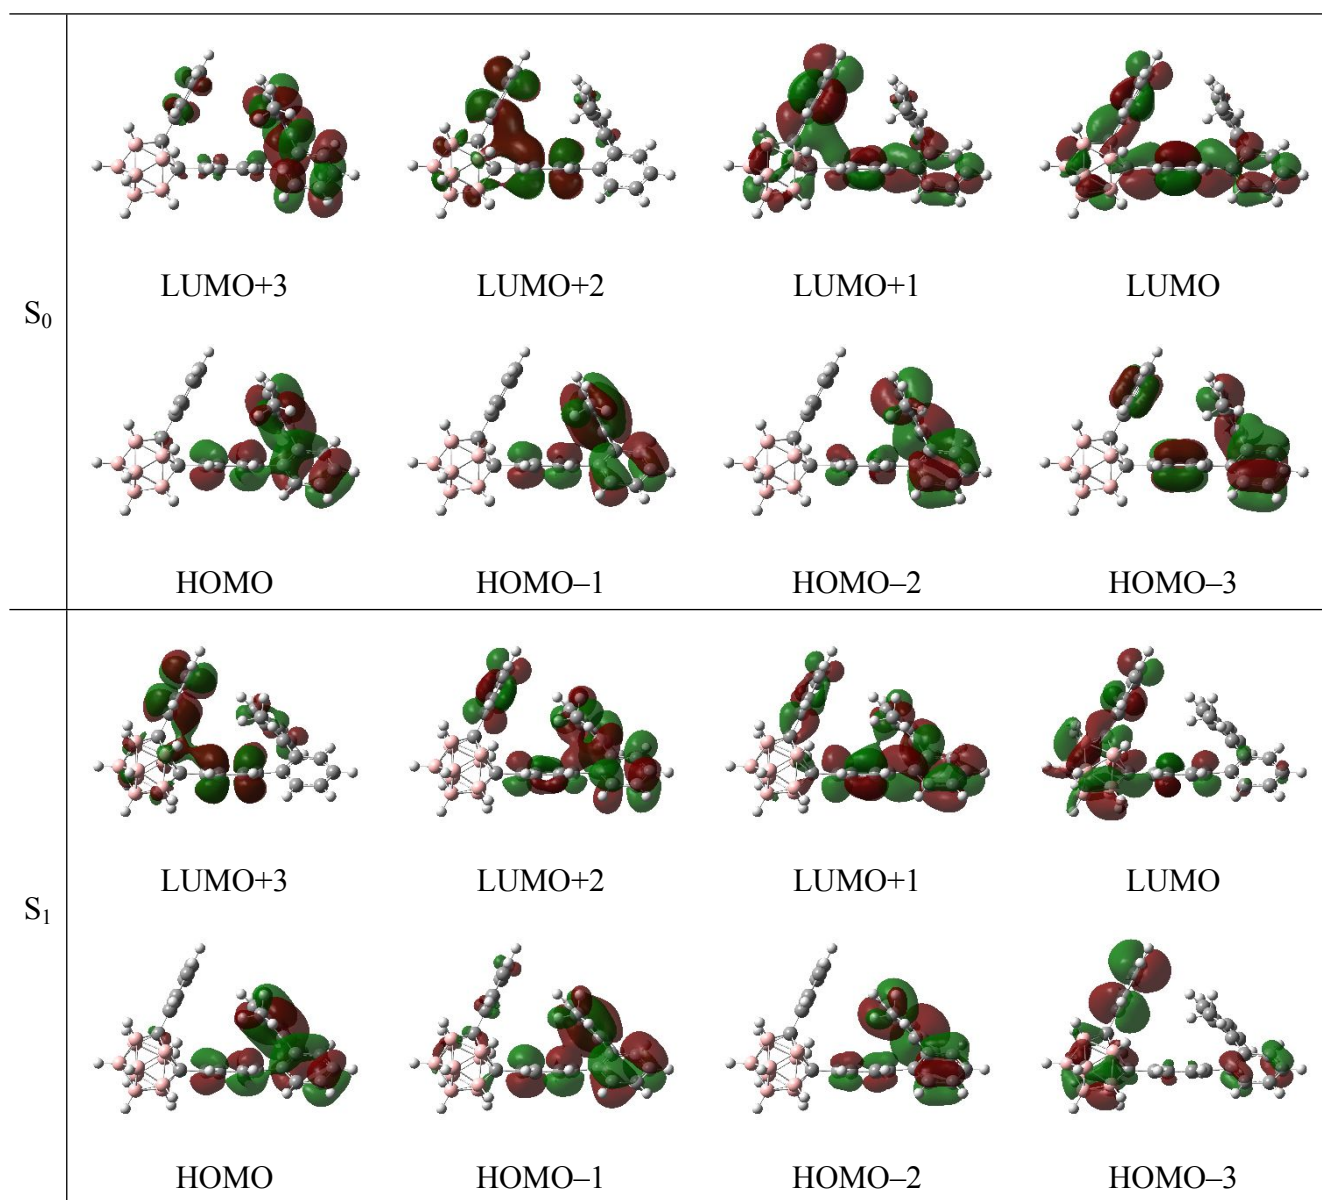

**Figure S51.** The selected frontier orbitals of **6HC** from B3LYP calculations (Isovalue = 0.04 a.u.) at their ground state (S<sub>0</sub>) and the first excited state (S<sub>1</sub>) fully optimized geometries in THF.

**Table S15.** Computed absorption wavelengths ( $\lambda_{\text{calc}}$  in nm) and oscillator strengths ( $f_{\text{calc}}$ ) for **6HC** from TD-B3LYP calculations using the B3LYP geometries at their ground state ( $S_0$ ) and the first excited state ( $S_1$ ) fully optimized geometries in THF

| state | $\lambda_{\text{calc}}$ (nm) | $f_{\text{calc}}$ | Major contribution                                                                                  |
|-------|------------------------------|-------------------|-----------------------------------------------------------------------------------------------------|
| $S_0$ |                              |                   |                                                                                                     |
| 1     | 293.71                       | 0.2315            | HOMO → LUMO (96.21%)                                                                                |
| 2     | 274.54                       | 0.1541            | HOMO-1 → LUMO (96.86%)                                                                              |
| 3     | 265.21                       | 0.0554            | HOMO-2 → LUMO (87.34%)                                                                              |
| 4     | 259.15                       | 0.0627            | HOMO-3 → LUMO (8.42%)<br>HOMO → LUMO+1 (71.48%)                                                     |
| 5     | 257.94                       | 0.0324            | HOMO-6 → LUMO (9.24%)<br>HOMO-3 → LUMO (30.38%)<br>HOMO → LUMO+1 (19.52%)<br>HOMO → LUMO+2 (18.71%) |
| $S_1$ |                              |                   |                                                                                                     |
| 1     | 502.25                       | 0.3158            | HOMO → LUMO (99.56%)                                                                                |
| 2     | 423.54                       | 0.1778            | HOMO-1 → LUMO (97.94%)                                                                              |
| 3     | 400.15                       | 0.1022            | HOMO-2 → LUMO (98.38%)                                                                              |
| 4     | 385.64                       | 0.0287            | HOMO-4 → LUMO (20.70%)<br>HOMO-3 → LUMO (70.40%)                                                    |
| 5     | 384.86                       | 0.0102            | HOMO-5 → LUMO (21.55%)<br>HOMO-4 → LUMO (69.29%)                                                    |

**Table S16.** Molecular orbital distributions (in %) and energies (in eV) of **6HC** at their ground state ( $S_0$ ) and the first excited state ( $S_1$ ) fully optimized geometries in THF

|        | E (eV) | car-phenyl | carborane | bridged phenyl | terminal phenyl |
|--------|--------|------------|-----------|----------------|-----------------|
| $S_0$  |        |            |           |                |                 |
| LUMO+3 | -0.47  | 5.65       | 1.14      | 2.93           | 90.3            |
| LUMO+2 | -0.69  | 46.0       | 9.10      | 41.5           | 3.36            |
| LUMO+1 | -1.01  | 54.1       | 15.5      | 14.1           | 16.3            |
| LUMO   | -1.52  | 13.7       | 28.0      | 40.3           | 18.0            |
| HOMO   | -6.30  | 0.07       | 2.03      | 23.0           | 74.9            |
| HOMO-1 | -6.57  | 0.05       | 1.46      | 15.5           | 83.0            |
| HOMO-2 | -6.75  | 0.67       | 0.97      | 7.47           | 90.9            |
| HOMO-3 | -7.06  | 8.09       | 0.50      | 31.3           | 60.1            |
| $S_1$  |        |            |           |                |                 |
| LUMO+3 | -0.60  | 73.2       | 7.43      | 16.9           | 2.48            |
| LUMO+2 | -0.68  | 12.8       | 1.99      | 11.3           | 73.8            |
| LUMO+1 | -1.24  | 7.41       | 4.22      | 30.6           | 57.8            |
| LUMO   | -3.42  | 13.5       | 72.8      | 11.4           | 2.32            |
| HOMO   | -5.89  | 0.59       | 2.84      | 18.2           | 78.4            |
| HOMO-1 | -6.57  | 2.30       | 5.04      | 28.2           | 64.5            |
| HOMO-2 | -6.68  | 0.71       | 0.85      | 8.04           | 90.4            |
| HOMO-3 | -7.16  | 70.9       | 20.0      | 1.23           | 7.97            |

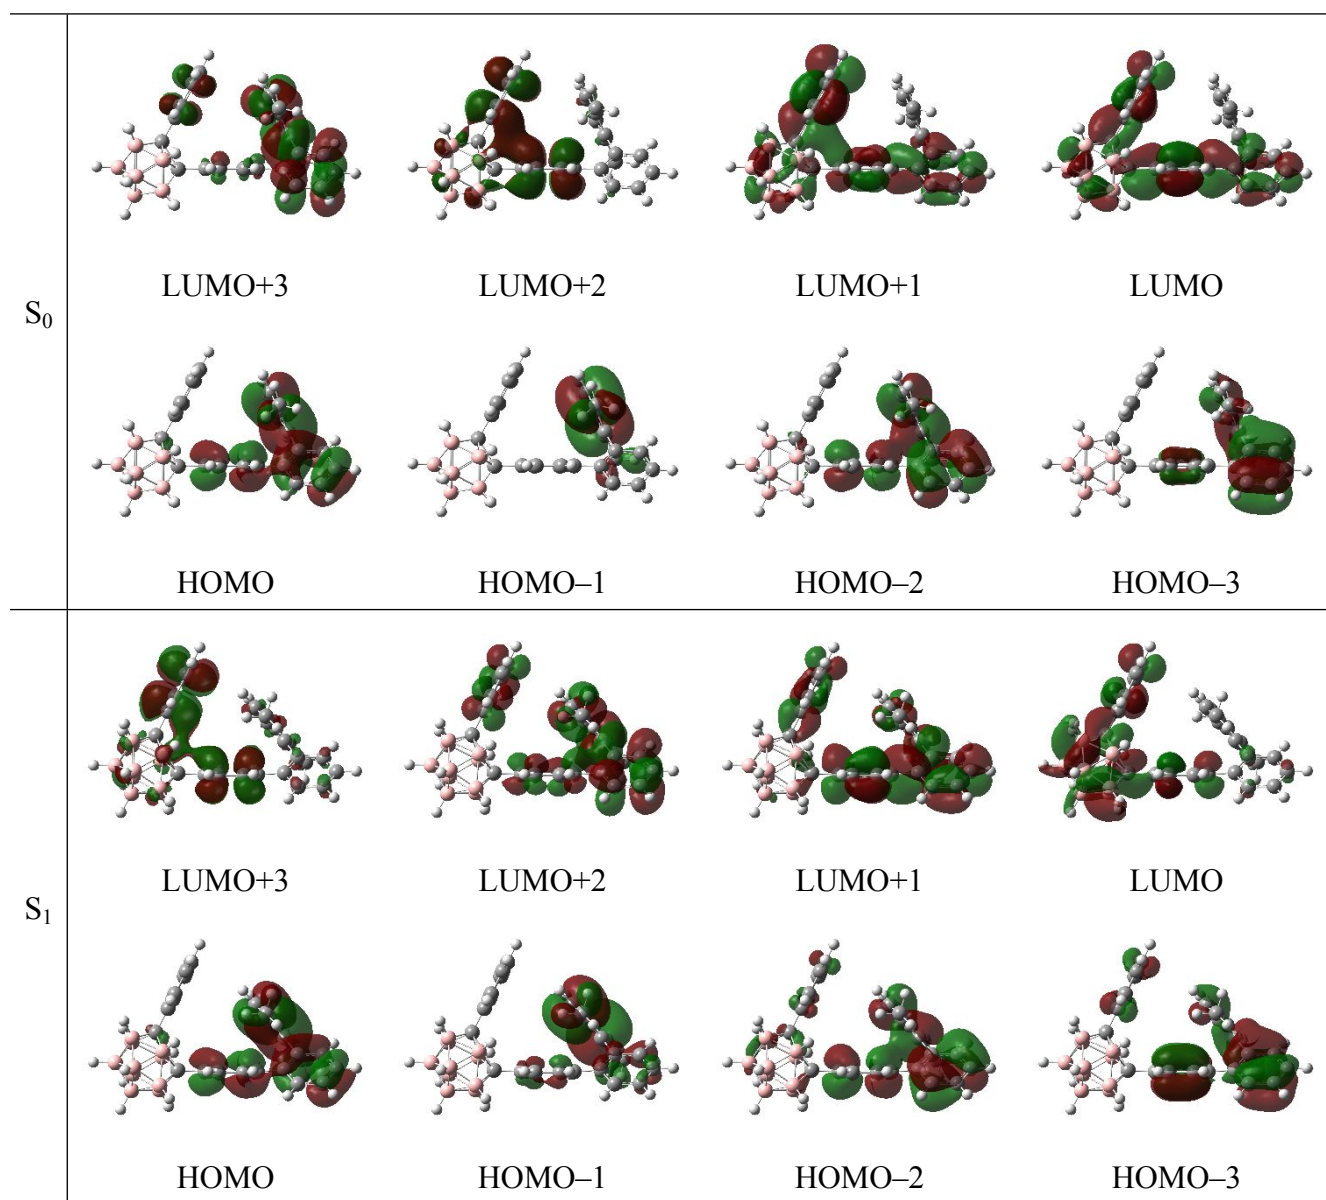

**Figure S52.** The selected frontier orbitals of **7HD** from B3LYP calculations (Isovalue = 0.04 a.u.) at their ground state (S<sub>0</sub>) and the first excited state (S<sub>1</sub>) fully optimized geometries in THF.

**Table S17.** Computed absorption wavelengths ( $\lambda_{\text{calc}}$  in nm) and oscillator strengths ( $f_{\text{calc.}}$ ) for **7HD** from TD-B3LYP calculations using the B3LYP geometries at their ground state ( $S_0$ ) and the first excited state ( $S_1$ ) fully optimized geometries in THF

| state | $\lambda_{\text{calc}}$ (nm) | $f_{\text{calc}}$ | Major contribution                                                        |
|-------|------------------------------|-------------------|---------------------------------------------------------------------------|
| $S_0$ |                              |                   |                                                                           |
| 1     | 292.30                       | 0.2093            | HOMO → LUMO (96.04%)                                                      |
| 2     | 281.16                       | 0.0076            | HOMO-1 → LUMO (97.46%)                                                    |
| 3     | 273.74                       | 0.3021            | HOMO-2 → LUMO (92.48%)                                                    |
| 4     | 259.65                       | 0.0044            | HOMO-6 → LUMO (6.42%)<br>HOMO-3 → LUMO (53.09%)<br>HOMO → LUMO+2 (12.72%) |
| 5     | 257.45                       | 0.0871            | HOMO → LUMO+1 (91.32%)                                                    |
| $S_1$ |                              |                   |                                                                           |
| 1     | 511.34                       | 0.3021            | HOMO → LUMO (99.56%)                                                      |
| 2     | 423.47                       | 0.0547            | HOMO-1 → LUMO (98.39%)                                                    |
| 3     | 411.01                       | 0.2824            | HOMO-2 → LUMO (97.41%)                                                    |
| 4     | 393.04                       | 0.0172            | HOMO-6 → LUMO (22.69%)<br>HOMO-3 → LUMO (74.29%)                          |
| 5     | 386.14                       | 0.0283            | HOMO-4 → LUMO (91.21%)                                                    |

**Table S18.** Molecular orbital distributions (in %) and energies (in eV) of **7HD** at their ground state ( $S_0$ ) and the first excited state ( $S_1$ ) fully optimized geometries in THF

|        | E (eV) | car-phenyl | carborane | bridged phenyl | terminal phenyl |
|--------|--------|------------|-----------|----------------|-----------------|
| $S_0$  |        |            |           |                |                 |
| LUMO+3 | -0.42  | 8.68       | 0.69      | 2.37           | 88.3            |
| LUMO+2 | -0.69  | 44.3       | 9.07      | 43.1           | 3.53            |
| LUMO+1 | -1.00  | 53.0       | 15.4      | 15.9           | 15.7            |
| LUMO   | -1.52  | 14.3       | 29.3      | 40.1           | 16.3            |
| HOMO   | -6.32  | 0.07       | 1.97      | 22.4           | 75.6            |
| HOMO-1 | -6.46  | 0.14       | 0.05      | 0.77           | 99.0            |
| HOMO-2 | -6.60  | 0.38       | 2.47      | 22.9           | 74.3            |
| HOMO-3 | -6.95  | 0.85       | 0.10      | 8.11           | 90.9            |
| $S_1$  |        |            |           |                |                 |
| LUMO+3 | -0.57  | 77.0       | 7.31      | 13.3           | 2.46            |
| LUMO+2 | -0.64  | 9.84       | 1.46      | 8.23           | 80.5            |
| LUMO+1 | -1.19  | 8.83       | 4.55      | 34.0           | 52.6            |
| LUMO   | -3.42  | 13.5       | 72.9      | 11.4           | 2.25            |
| HOMO   | -5.90  | 0.56       | 2.80      | 18.6           | 78.0            |
| HOMO-1 | -6.46  | 0.29       | 0.49      | 4.83           | 94.4            |
| HOMO-2 | -6.57  | 2.80       | 5.37      | 27.6           | 64.3            |
| HOMO-3 | -7.11  | 9.35       | 3.59      | 47.0           | 40.1            |



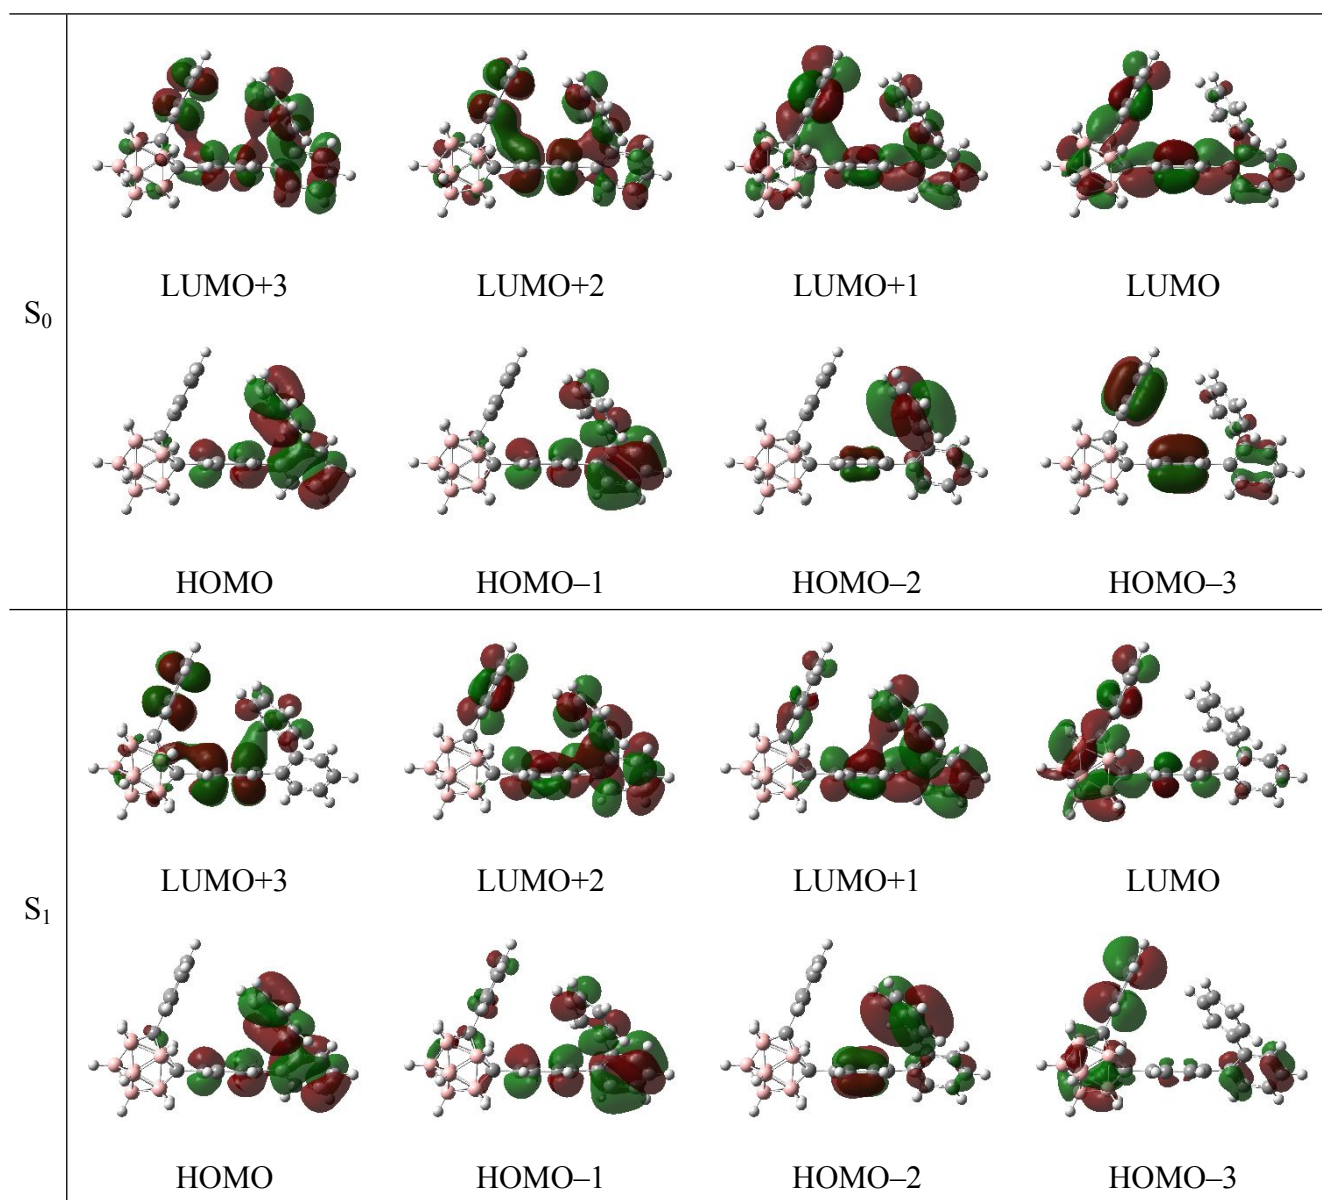

**Figure S53.** The selected frontier orbitals of **8HP** from B3LYP calculations (Isovalue = 0.04 a.u.) at their ground state (S<sub>0</sub>) and the first excited state (S<sub>1</sub>) fully optimized geometries in THF.

**Table S19.** Computed absorption wavelengths ( $\lambda_{\text{calc}}$  in nm) and oscillator strengths ( $f_{\text{calc}}$ ) for **8HP** from TD-B3LYP calculations using the B3LYP geometries at their ground state ( $S_0$ ) and the first excited state ( $S_1$ ) fully optimized geometries in THF

| state | $\lambda_{\text{calc}}$ (nm) | $f_{\text{calc}}$ | Major contribution                                                                                             |
|-------|------------------------------|-------------------|----------------------------------------------------------------------------------------------------------------|
| $S_0$ |                              |                   |                                                                                                                |
| 1     | 301.60                       | 0.2441            | HOMO $\rightarrow$ LUMO (97.19%)                                                                               |
| 2     | 271.44                       | 0.1757            | HOMO-1 $\rightarrow$ LUMO (79.88%)<br>HOMO $\rightarrow$ LUMO+3 (5.79%)                                        |
| 3     | 266.44                       | 0.0859            | HOMO $\rightarrow$ LUMO+1 (91.04%)                                                                             |
| 4     | 262.19                       | 0.0216            | HOMO-3 $\rightarrow$ LUMO (15.38%)<br>HOMO-2 $\rightarrow$ LUMO (31.44%)<br>HOMO $\rightarrow$ LUMO+2 (23.13%) |
| 5     | 257.01                       | 0.0209            | HOMO-3 $\rightarrow$ LUMO (13.34%)<br>HOMO-2 $\rightarrow$ LUMO (53.17%)<br>HOMO $\rightarrow$ LUMO+2 (17.90%) |
| $S_1$ |                              |                   |                                                                                                                |
| 1     | 513.55                       | 0.3047            | HOMO $\rightarrow$ LUMO (99.53%)                                                                               |
| 2     | 429.62                       | 0.1632            | HOMO-1 $\rightarrow$ LUMO (98.13%)                                                                             |
| 3     | 400.17                       | 0.0143            | HOMO-2 $\rightarrow$ LUMO (93.15%)                                                                             |
| 4     | 385.53                       | 0.0069            | HOMO-3 $\rightarrow$ LUMO (96.26%)                                                                             |
| 5     | 383.60                       | 0.4139            | HOMO-4 $\rightarrow$ LUMO (96.47%)                                                                             |

**Table S20.** Molecular orbital distributions (in %) and energies (in eV) of **8HP** at their ground state ( $S_0$ ) and the first excited state ( $S_1$ ) fully optimized geometries in THF

|        | E (eV) | car-phenyl | carborane | bridged phenyl | terminal phenyl |
|--------|--------|------------|-----------|----------------|-----------------|
| $S_0$  |        |            |           |                |                 |
| LUMO+3 | -0.63  | 28.6       | 5.09      | 12.7           | 53.7            |
| LUMO+2 | -0.73  | 31.5       | 7.02      | 33.8           | 27.7            |
| LUMO+1 | -1.03  | 47.6       | 13.5      | 12.9           | 26.0            |
| LUMO   | -1.53  | 16.2       | 30.0      | 36.9           | 17.2            |
| HOMO   | -6.19  | 0.07       | 1.76      | 20.5           | 77.7            |
| HOMO-1 | -6.67  | 0.30       | 2.55      | 21.6           | 75.5            |
| HOMO-2 | -6.88  | 0.24       | 0.11      | 6.15           | 93.5            |
| HOMO-3 | -7.13  | 23.5       | 1.27      | 64.2           | 11.0            |
| $S_1$  |        |            |           |                |                 |
| LUMO+3 | -0.61  | 54.6       | 7.77      | 31.1           | 6.56            |
| LUMO+2 | -0.74  | 14.5       | 2.67      | 20.9           | 62.0            |
| LUMO+1 | -1.35  | 4.58       | 3.29      | 22.3           | 70.0            |
| LUMO   | -3.41  | 13.5       | 72.7      | 11.4           | 2.37            |
| HOMO   | -5.88  | 0.62       | 3.09      | 19.0           | 77.3            |
| HOMO-1 | -6.62  | 3.08       | 5.40      | 26.8           | 64.8            |
| HOMO-2 | -6.91  | 0.67       | 0.78      | 22.6           | 76.0            |
| HOMO-3 | -7.16  | 69.9       | 19.7      | 1.71           | 8.69            |

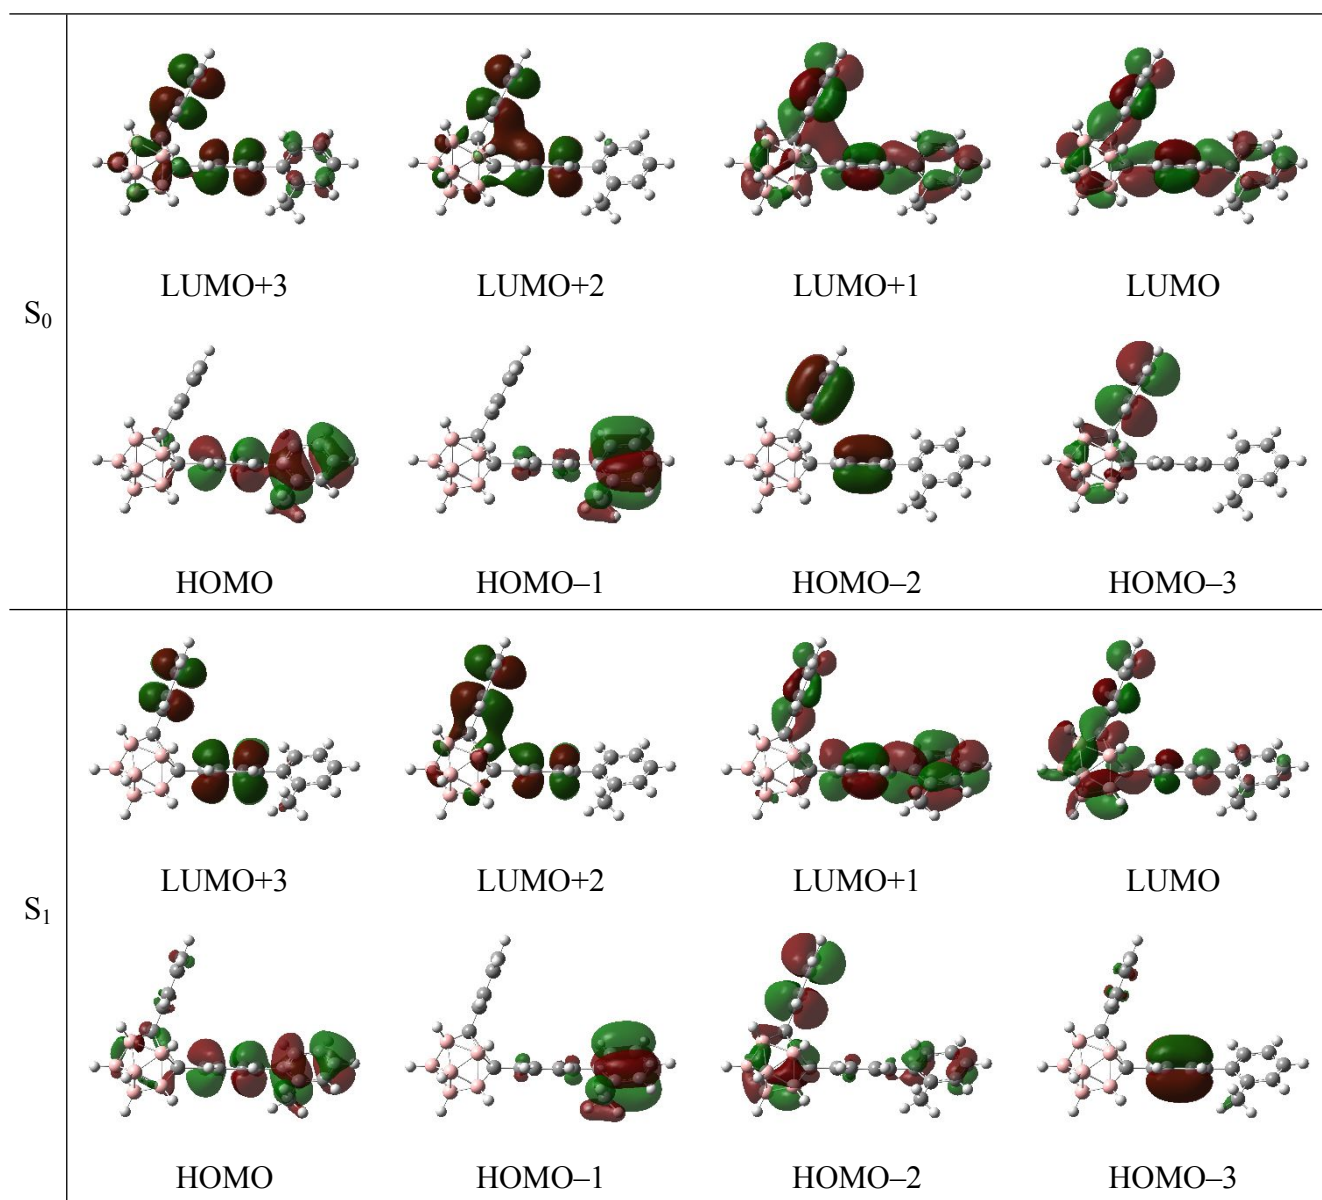

**Figure S54.** The selected frontier orbitals of **9HM** from B3LYP calculations (Isovalue = 0.04 a.u.) at their ground state (S<sub>0</sub>) and the first excited state (S<sub>1</sub>) fully optimized geometries in THF.

**Table S21.** Computed absorption wavelengths ( $\lambda_{\text{calc}}$  in nm) and oscillator strengths ( $f_{\text{calc}}$ ) for **9HM** from TD-B3LYP calculations using the B3LYP geometries at their ground state ( $S_0$ ) and the first excited state ( $S_1$ ) fully optimized geometries in THF

| state | $\lambda_{\text{calc}}$ (nm) | $f_{\text{calc}}$ | Major contribution      |
|-------|------------------------------|-------------------|-------------------------|
| $S_0$ |                              |                   |                         |
| 1     | 282.50                       | 0.4541            | HOMO → LUMO (97.69%)    |
| 2     | 265.17                       | 0.0358            | HOMO-1 → LUMO (85.98%)  |
| 3     | 255.74                       | 0.0026            | HOMO-4 → LUMO (15.10%)  |
|       |                              |                   | HOMO-2 → LUMO (40.39%)  |
|       |                              |                   | HOMO → LUMO+2 (28.63%)  |
| 4     | 249.62                       | 0.1385            | HOMO → LUMO+1 (93.27%)  |
| 5     | 247.29                       | 0.0072            | HOMO-4 → LUMO (41.10%)  |
|       |                              |                   | HOMO-3 → LUMO+2 (8.02%) |
|       |                              |                   | HOMO-2 → LUMO (34.07%)  |
| $S_1$ |                              |                   |                         |
| 1     | 508.88                       | 0.3486            | HOMO → LUMO (99.26%)    |
| 2     | 409.26                       | 0.0171            | HOMO-1 → LUMO (98.84%)  |
| 3     | 386.66                       | 0.0111            | HOMO-4 → LUMO (7.19%)   |
|       |                              |                   | HOMO-2 → LUMO (88.79%)  |
| 4     | 384.50                       | 0.2041            | HOMO-4 → LUMO (42.39%)  |
|       |                              |                   | HOMO-3 → LUMO (54.22%)  |
| 5     | 384.33                       | 0.2620            | HOMO-4 → LUMO (53.14%)  |
|       |                              |                   | HOMO-3 → LUMO (9.00%)   |
|       |                              |                   | HOMO-2 → LUMO (36.00%)  |

**Table S22.** Molecular orbital distributions (in %) and energies (in eV) of **9HM** at their ground state ( $S_0$ ) and the first excited state ( $S_1$ ) fully optimized geometries in THF

|        | E (eV) | car-phenyl | carborane | bridged phenyl | terminal phenyl |
|--------|--------|------------|-----------|----------------|-----------------|
| $S_0$  |        |            |           |                |                 |
| LUMO+3 | -0.31  | 49.5       | 1.28      | 41.3           | 7.91            |
| LUMO+2 | -0.70  | 43.4       | 9.17      | 45.8           | 1.66            |
| LUMO+1 | -0.96  | 51.2       | 13.7      | 22.2           | 12.9            |
| LUMO   | -1.50  | 18.3       | 32.7      | 38.2           | 10.8            |
| HOMO   | -6.42  | 0.14       | 3.25      | 32.3           | 64.3            |
| HOMO-1 | -6.73  | 0.03       | 0.43      | 3.81           | 95.7            |
| HOMO-2 | -7.14  | 82.0       | 12.7      | 4.42           | 0.84            |
| HOMO-3 | -7.17  | 49.0       | 1.79      | 48.8           | 0.43            |
| $S_1$  |        |            |           |                |                 |
| LUMO+3 | -0.40  | 19.6       | 2.78      | 74.9           | 2.81            |
| LUMO+2 | -0.56  | 75.4       | 8.36      | 15.8           | 0.40            |
| LUMO+1 | -1.18  | 9.86       | 5.16      | 43.8           | 41.2            |
| LUMO   | -3.42  | 14.5       | 72.6      | 10.5           | 2.43            |
| HOMO   | -6.12  | 1.79       | 6.79      | 39.1           | 52.4            |
| HOMO-1 | -6.83  | 0.80       | 0.65      | 2.56           | 96.0            |
| HOMO-2 | -7.14  | 71.0       | 20.2      | 1.82           | 7.02            |
| HOMO-3 | -7.25  | 0.09       | 2.36      | 96.9           | 0.67            |

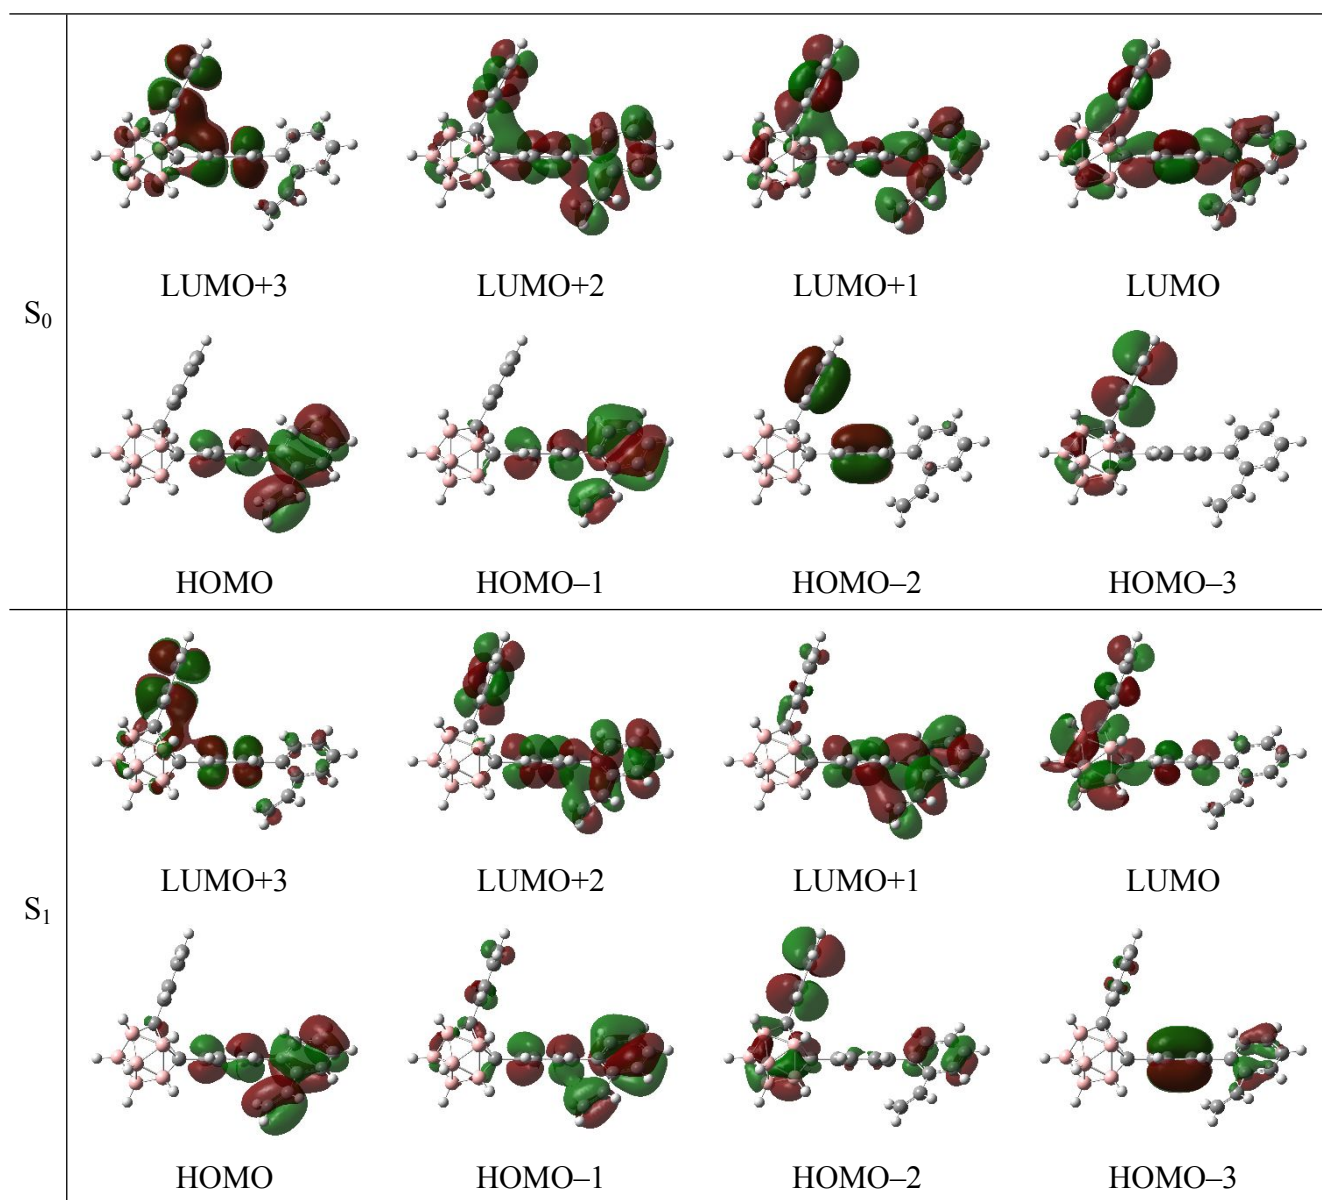

**Figure S55.** The selected frontier orbitals of **10HV** from B3LYP calculations (Isovalue = 0.04 a.u.) at their ground state (S<sub>0</sub>) and the first excited state (S<sub>1</sub>) fully optimized geometries in THF.

**Table S23.** Computed absorption wavelengths ( $\lambda_{\text{calc}}$  in nm) and oscillator strengths ( $f_{\text{calc}}$ ) for **10HV** from TD-B3LYP calculations using the B3LYP geometries at their ground state ( $S_0$ ) and the first excited state ( $S_1$ ) fully optimized geometries in THF

| state | $\lambda_{\text{calc}}$ (nm) | $f_{\text{calc}}$ | Major contribution                                                                                                                                  |
|-------|------------------------------|-------------------|-----------------------------------------------------------------------------------------------------------------------------------------------------|
| $S_0$ |                              |                   |                                                                                                                                                     |
| 1     | 303.25                       | 0.2047            | HOMO $\rightarrow$ LUMO (96.42%)                                                                                                                    |
| 2     | 271.48                       | 0.1528            | HOMO-1 $\rightarrow$ LUMO (67.52%)<br>HOMO-1 $\rightarrow$ LUMO+1 (7.80%)<br>HOMO $\rightarrow$ LUMO+2 (13.51%)                                     |
| 3     | 267.30                       | 0.0316            | HOMO $\rightarrow$ LUMO+1 (89.11%)                                                                                                                  |
| 4     | 260.42                       | 0.0014            | HOMO-4 $\rightarrow$ LUMO (10.15%)<br>HOMO-2 $\rightarrow$ LUMO (23.18%)<br>HOMO $\rightarrow$ LUMO+3 (43.74%)<br>HOMO $\rightarrow$ LUMO+4 (7.09%) |
| 5     | 251.92                       | 0.1369            | HOMO-1 $\rightarrow$ LUMO (26.68%)<br>HOMO-1 $\rightarrow$ LUMO+1 (24.67%)<br>HOMO $\rightarrow$ LUMO+2 (23.98%)                                    |
| $S_1$ |                              |                   |                                                                                                                                                     |
| 1     | 522.50                       | 0.3546            | HOMO $\rightarrow$ LUMO (99.55%)                                                                                                                    |
| 2     | 402.13                       | 0.1398            | HOMO-1 $\rightarrow$ LUMO (97.55%)                                                                                                                  |
| 3     | 389.30                       | 0.0086            | HOMO-3 $\rightarrow$ LUMO (7.51%)<br>HOMO-2 $\rightarrow$ LUMO (88.82%)                                                                             |
| 4     | 387.85                       | 0.0085            | HOMO-4 $\rightarrow$ LUMO (7.71%)<br>HOMO-3 $\rightarrow$ LUMO (90.40%)                                                                             |
| 5     | 384.97                       | 0.2358            | HOMO-4 $\rightarrow$ LUMO (96.17%)                                                                                                                  |



**Table S24.** Molecular orbital distributions (in %) and energies (in eV) of **10HV** at their ground state ( $S_0$ ) and the first excited state ( $S_1$ ) fully optimized geometries in THF

|        | E (eV) | car-phenyl | carborane | bridged<br>phenyl | terminal<br>phenyl |
|--------|--------|------------|-----------|-------------------|--------------------|
| $S_0$  |        |            |           |                   |                    |
| LUMO+3 | -0.69  | 45.2       | 9.27      | 39.8              | 5.67               |
| LUMO+2 | -0.72  | 18.2       | 6.74      | 23.0              | 52.1               |
| LUMO+1 | -1.06  | 39.6       | 13.9      | 6.08              | 40.5               |
| LUMO   | -1.52  | 14.7       | 28.3      | 36.7              | 20.2               |
| HOMO   | -6.15  | 0.06       | 1.41      | 17.3              | 81.2               |
| HOMO-1 | -6.72  | 0.23       | 2.88      | 23.7              | 73.2               |
| HOMO-2 | -7.14  | 37.5       | 1.35      | 59.0              | 2.14               |
| HOMO-3 | -7.17  | 83.9       | 13.2      | 1.83              | 1.15               |
| $S_1$  |        |            |           |                   |                    |
| LUMO+3 | -0.55  | 73.7       | 7.98      | 15.8              | 2.54               |
| LUMO+2 | -0.69  | 18.5       | 3.50      | 26.4              | 51.6               |
| LUMO+1 | -1.48  | 2.84       | 3.15      | 21.1              | 72.9               |
| LUMO   | -3.42  | 13.4       | 73.0      | 11.2              | 2.38               |
| HOMO   | -5.83  | 0.69       | 3.20      | 21.5              | 74.6               |
| HOMO-1 | -6.68  | 4.56       | 5.87      | 27.8              | 61.7               |
| HOMO-2 | -7.14  | 70.4       | 19.3      | 1.08              | 9.27               |
| HOMO-3 | -7.22  | 0.17       | 2.04      | 90.9              | 6.86               |

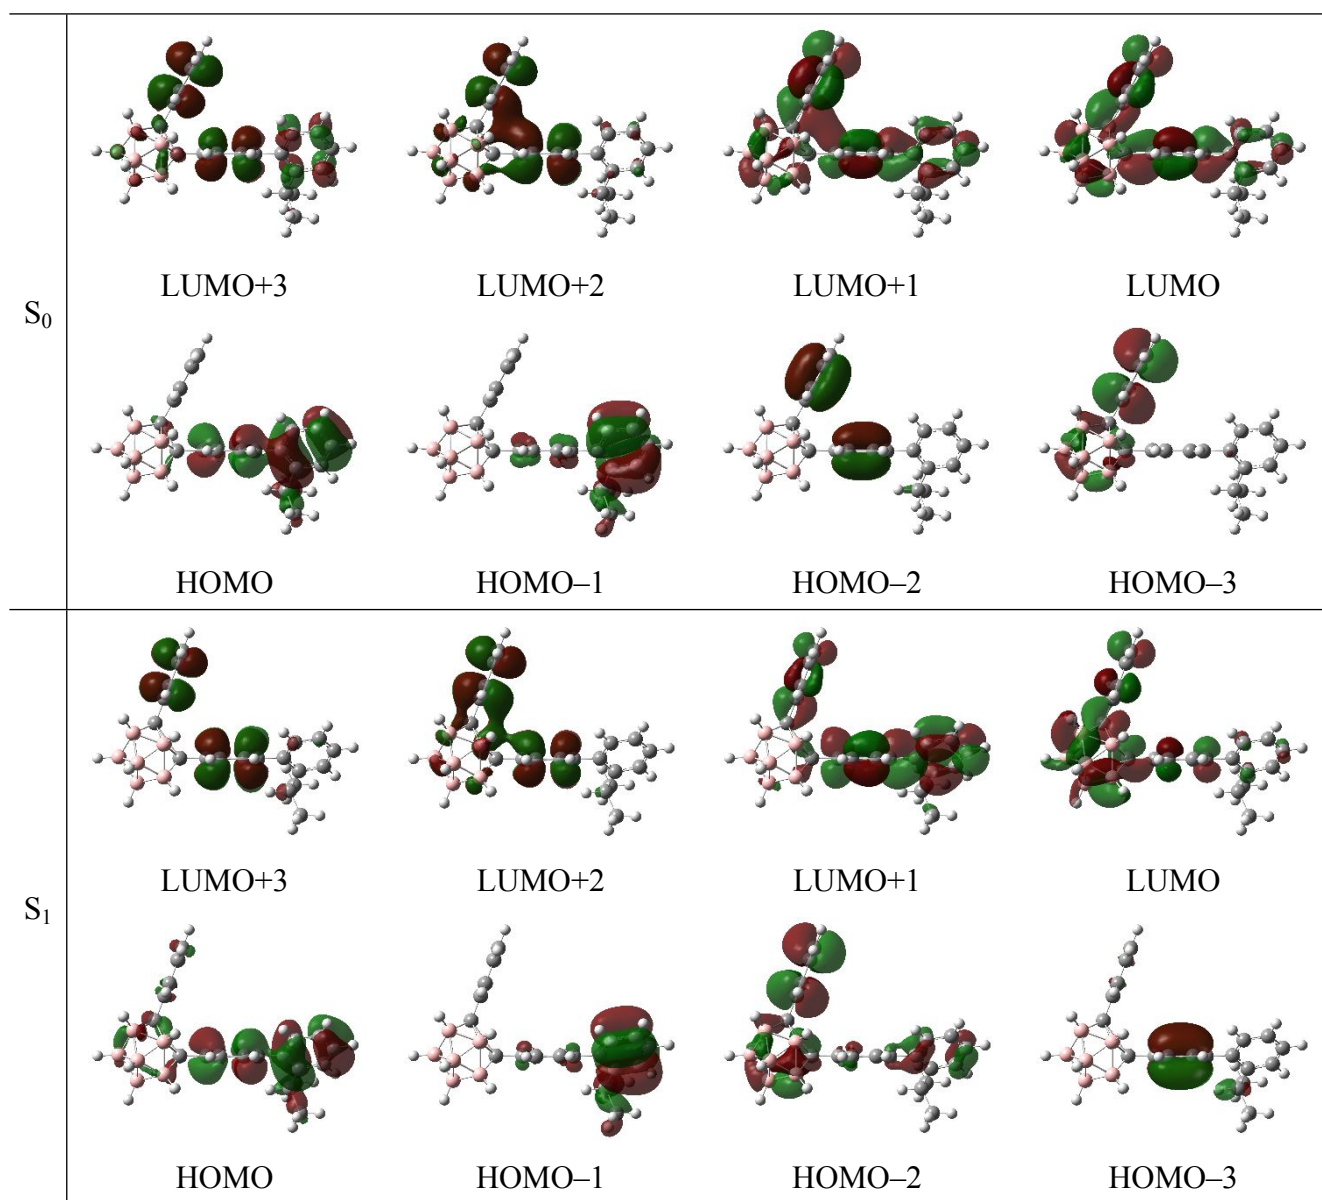

**Figure S56.** The selected frontier orbitals of **11HI** from B3LYP calculations (Isovalue = 0.04 a.u.) at their ground state (S<sub>0</sub>) and the first excited state (S<sub>1</sub>) fully optimized geometries in THF.

**Table S25.** Computed absorption wavelengths ( $\lambda_{\text{calc}}$  in nm) and oscillator strengths ( $f_{\text{calc.}}$ ) for **11HI** from TD-B3LYP calculations using the B3LYP geometries at their ground state ( $S_0$ ) and the first excited state ( $S_1$ ) fully optimized geometries in THF

| state | $\lambda_{\text{calc}}$ (nm) | $f_{\text{calc}}$ | Major contribution                  |
|-------|------------------------------|-------------------|-------------------------------------|
| $S_0$ |                              |                   |                                     |
| 1     | 279.04                       | 0.3991            | HOMO $\rightarrow$ LUMO (97.22%)    |
| 2     | 264.11                       | 0.0313            | HOMO-1 $\rightarrow$ LUMO (86.04%)  |
| 3     | 254.20                       | 0.0039            | HOMO-4 $\rightarrow$ LUMO (13.13%)  |
|       |                              |                   | HOMO-2 $\rightarrow$ LUMO (41.99%)  |
|       |                              |                   | HOMO $\rightarrow$ LUMO+2 (27.20%)  |
| 4     | 247.22                       | 0.1083            | HOMO $\rightarrow$ LUMO+1 (90.67%)  |
| 5     | 246.74                       | 0.0078            | HOMO-4 $\rightarrow$ LUMO (41.82%)  |
|       |                              |                   | HOMO-3 $\rightarrow$ LUMO+2 (8.02%) |
|       |                              |                   | HOMO-2 $\rightarrow$ LUMO (31.60%)  |
| $S_1$ |                              |                   |                                     |
| 1     | 498.13                       | 0.2446            | HOMO $\rightarrow$ LUMO (99.24%)    |
| 2     | 413.17                       | 0.0156            | HOMO-1 $\rightarrow$ LUMO (98.99%)  |
| 3     | 387.51                       | 0.0037            | HOMO-2 $\rightarrow$ LUMO (94.70%)  |
| 4     | 384.87                       | 0.4566            | HOMO-3 $\rightarrow$ LUMO (96.44%)  |
| 5     | 384.51                       | 0.0142            | HOMO-4 $\rightarrow$ LUMO (92.43%)  |

**Table S26.** Molecular orbital distributions (in %) and energies (in eV) of **11HI** at their ground state ( $S_0$ ) and the first excited state ( $S_1$ ) fully optimized geometries in THF

|        | E (eV) | car-phenyl | carborane | bridged phenyl | terminal phenyl |
|--------|--------|------------|-----------|----------------|-----------------|
| $S_0$  |        |            |           |                |                 |
| LUMO+3 | -0.33  | 50.7       | 1.29      | 34.5           | 13.5            |
| LUMO+2 | -0.72  | 40.7       | 8.96      | 47.4           | 3.00            |
| LUMO+1 | -0.93  | 48.5       | 12.8      | 26.9           | 11.8            |
| LUMO   | -1.48  | 21.7       | 34.8      | 35.8           | 7.65            |
| HOMO   | -6.46  | 0.14       | 3.10      | 30.9           | 65.9            |
| HOMO-1 | -6.71  | 0.04       | 0.48      | 4.52           | 95.0            |
| HOMO-2 | -7.14  | 84.1       | 13.6      | 0.88           | 1.44            |
| HOMO-3 | -7.17  | 43.6       | 0.92      | 54.5           | 1.00            |
| $S_1$  |        |            |           |                |                 |
| LUMO+3 | -0.41  | 22.1       | 2.49      | 71.5           | 3.86            |
| LUMO+2 | -0.57  | 72.7       | 8.47      | 18.2           | 0.64            |
| LUMO+1 | -1.14  | 10.7       | 5.02      | 44.3           | 40.1            |
| LUMO   | -3.40  | 14.5       | 72.8      | 10.5           | 2.22            |
| HOMO   | -6.12  | 1.76       | 6.67      | 38.6           | 53.0            |
| HOMO-1 | -6.80  | 0.68       | 0.66      | 2.72           | 95.9            |
| HOMO-2 | -7.14  | 70.1       | 19.9      | 2.23           | 7.76            |
| HOMO-3 | -7.24  | 0.12       | 2.25      | 95.6           | 2.07            |

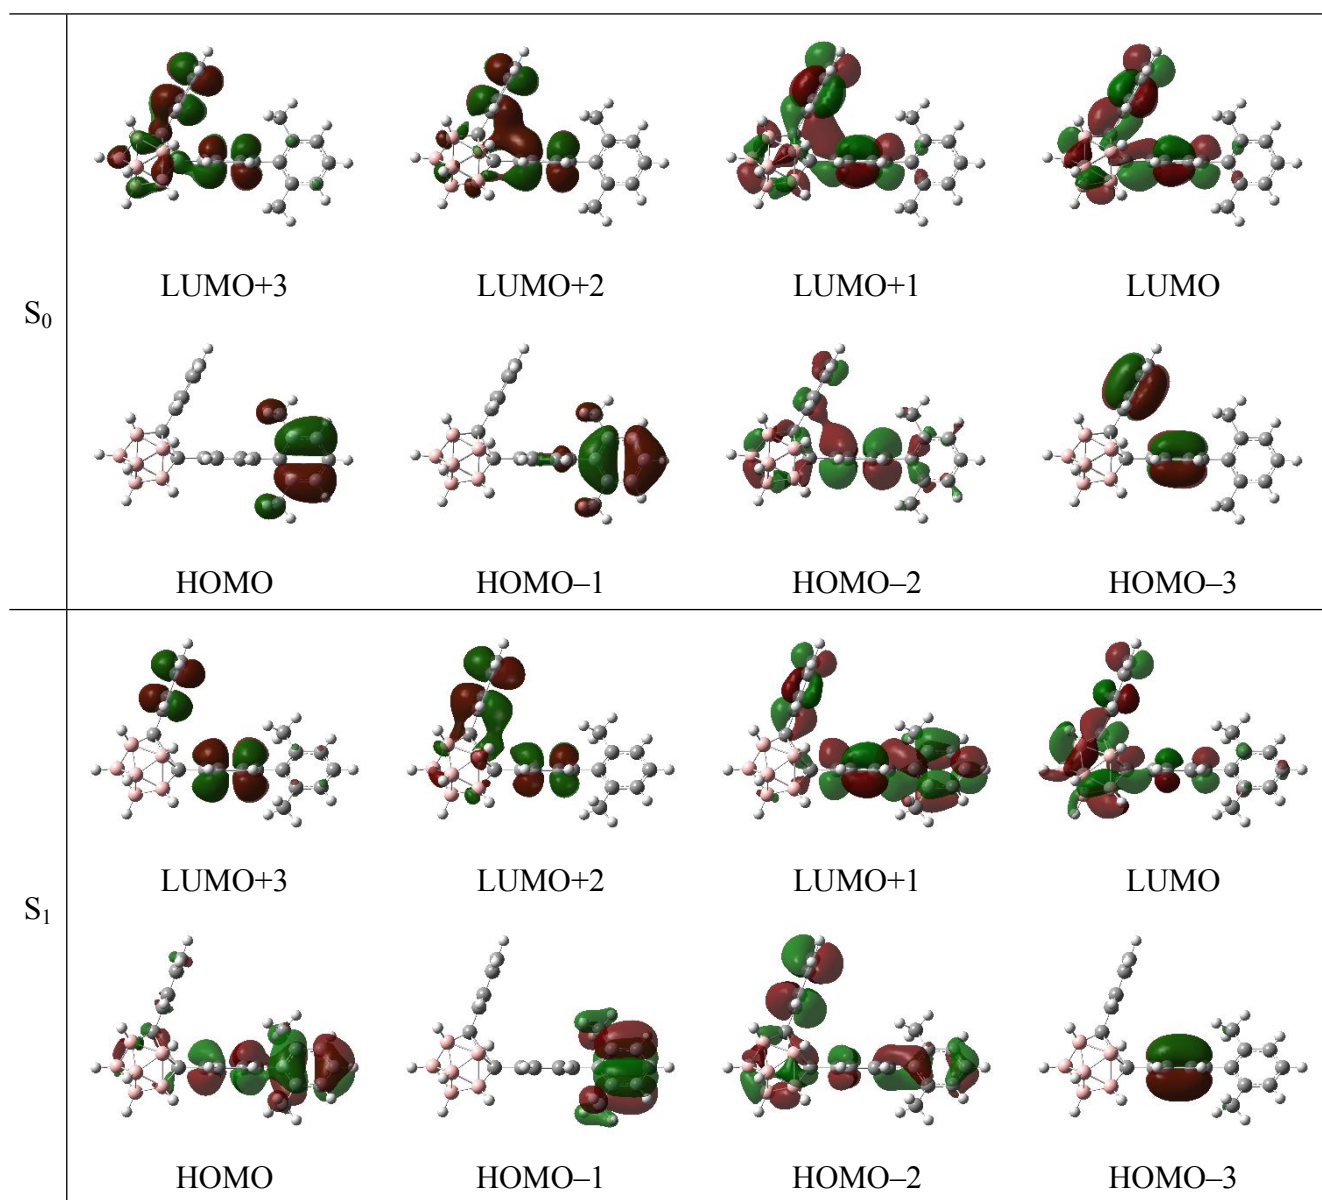

**Figure S57.** The selected frontier orbitals of **12MM** from B3LYP calculations (Isovalue = 0.04 a.u.) at their ground state (S<sub>0</sub>) and the first excited state (S<sub>1</sub>) fully optimized geometries in THF.

**Table S27.** Computed absorption wavelengths ( $\lambda_{\text{calc}}$  in nm) and oscillator strengths ( $f_{\text{calc.}}$ ) for **12MM** from TD-B3LYP calculations using the B3LYP geometries at their ground state ( $S_0$ ) and the first excited state ( $S_1$ ) fully optimized geometries in THF

| state | $\lambda_{\text{calc}}$ (nm) | $f_{\text{calc}}$ | Major contribution                                                                                              |
|-------|------------------------------|-------------------|-----------------------------------------------------------------------------------------------------------------|
| $S_0$ |                              |                   |                                                                                                                 |
| 1     | 287.21                       | 0.0101            | HOMO $\rightarrow$ LUMO (93.48%)                                                                                |
| 2     | 268.23                       | 0.0003            | HOMO-1 $\rightarrow$ LUMO (88.92%)<br>HOMO-1 $\rightarrow$ LUMO+1 (8.24%)                                       |
| 3     | 247.94                       | 0.0308            | HOMO-3 $\rightarrow$ LUMO (66.15%)<br>HOMO-2 $\rightarrow$ LUMO (9.64%)<br>HOMO-2 $\rightarrow$ LUMO+2 (12.26%) |
| 4     | 245.67                       | 0.2758            | HOMO-2 $\rightarrow$ LUMO (84.51%)                                                                              |
| 5     | 243.50                       | 0.0010            | HOMO-5 $\rightarrow$ LUMO (66.54%)<br>HOMO-4 $\rightarrow$ LUMO+2 (10.97%)                                      |
| $S_1$ |                              |                   |                                                                                                                 |
| 1     | 500.98                       | 0.1012            | HOMO $\rightarrow$ LUMO (99.24%)                                                                                |
| 2     | 418.65                       | 0.0018            | HOMO-1 $\rightarrow$ LUMO (99.80%)                                                                              |
| 3     | 392.64                       | 0.2513            | HOMO-2 $\rightarrow$ LUMO (98.48%)                                                                              |
| 4     | 390.29                       | 0.0040            | HOMO-3 $\rightarrow$ LUMO (96.02%)                                                                              |
| 5     | 386.24                       | 0.0073            | HOMO-4 $\rightarrow$ LUMO (95.16%)                                                                              |

**Table S28.** Molecular orbital distributions (in %) and energies (in eV) of **12MM** at their ground state ( $S_0$ ) and the first excited state ( $S_1$ ) fully optimized geometries in THF

|        | E (eV) | car-phenyl | carborane | bridged phenyl | terminal phenyl |
|--------|--------|------------|-----------|----------------|-----------------|
| $S_0$  |        |            |           |                |                 |
| LUMO+3 | -0.32  | 53.2       | 1.44      | 43.2           | 2.11            |
| LUMO+2 | -0.72  | 41.1       | 9.06      | 48.6           | 1.27            |
| LUMO+1 | -0.84  | 42.6       | 13.9      | 42.0           | 1.58            |
| LUMO   | -1.40  | 31.2       | 38.2      | 29.4           | 1.15            |
| HOMO   | -6.50  | 0.00       | 0.00      | 0.16           | 99.8            |
| HOMO-1 | -6.60  | 0.00       | 0.05      | 3.92           | 96.0            |
| HOMO-2 | -7.05  | 4.74       | 12.1      | 77.9           | 5.21            |
| HOMO-3 | -7.15  | 47.8       | 2.02      | 49.7           | 0.40            |
| $S_1$  |        |            |           |                |                 |
| LUMO+3 | -0.39  | 18.5       | 2.71      | 75.1           | 3.77            |
| LUMO+2 | -0.56  | 76.3       | 8.14      | 15.1           | 0.49            |
| LUMO+1 | -1.06  | 12.7       | 4.97      | 45.2           | 37.2            |
| LUMO   | -3.43  | 14.2       | 73.3      | 10.7           | 1.82            |
| HOMO   | -6.14  | 1.49       | 5.53      | 32.3           | 60.7            |
| HOMO-1 | -6.61  | 0.00       | 0.00      | 0.04           | 99.9            |
| HOMO-2 | -7.10  | 56.9       | 17.5      | 11.5           | 14.0            |
| HOMO-3 | -7.23  | 0.04       | 2.31      | 96.8           | 8.52            |

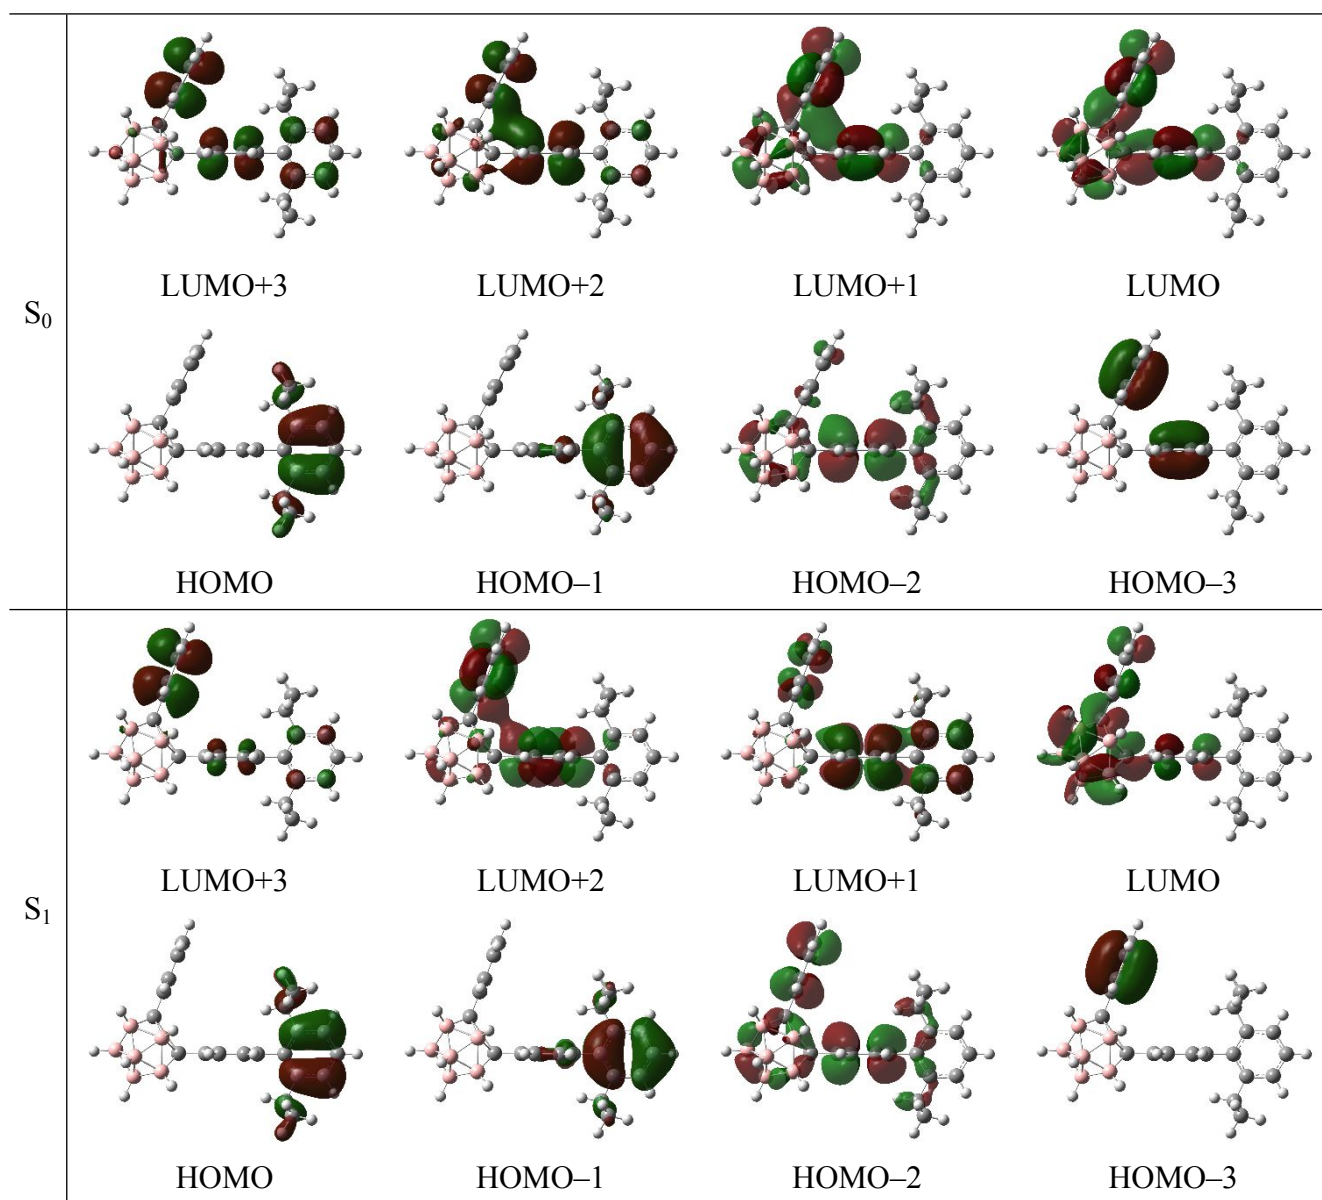

**Figure S58.** The selected frontier orbitals of **13PP** from B3LYP calculations (Isovalue = 0.04 a.u.) at their ground state (S<sub>0</sub>) and the first excited state (S<sub>1</sub>) fully optimized geometries in THF.



**Table S29.** Computed absorption wavelengths ( $\lambda_{\text{calc}}$  in nm) and oscillator strengths ( $f_{\text{calc.}}$ ) for **13PP** from TD-B3LYP calculations using the B3LYP geometries at their ground state ( $S_0$ ) and the first excited state ( $S_1$ ) fully optimized geometries in THF

| state | $\lambda_{\text{calc}}$ (nm) | $f_{\text{calc}}$ | Major contribution                                                                                             |
|-------|------------------------------|-------------------|----------------------------------------------------------------------------------------------------------------|
| $S_0$ |                              |                   |                                                                                                                |
| 1     | 284.21                       | 0.0268            | HOMO $\rightarrow$ LUMO (95.39%)                                                                               |
| 2     | 265.99                       | 0.0000            | HOMO-1 $\rightarrow$ LUMO (90.74%)<br>HOMO-1 $\rightarrow$ LUMO+1 (8.19%)                                      |
| 3     | 248.13                       | 0.0087            | HOMO-3 $\rightarrow$ LUMO (67.89%)<br>HOMO-2 $\rightarrow$ LUMO+2 (17.11%)                                     |
| 4     | 247.91                       | 0.3050            | HOMO-2 $\rightarrow$ LUMO (94.28%)                                                                             |
| 5     | 243.83                       | 0.0014            | HOMO-5 $\rightarrow$ LUMO (59.44%)<br>HOMO-4 $\rightarrow$ LUMO+2 (9.10%)<br>HOMO-3 $\rightarrow$ LUMO (8.88%) |
| $S_1$ |                              |                   |                                                                                                                |
| 1     | 521.05                       | 0.0297            | HOMO $\rightarrow$ LUMO (99.88%)                                                                               |
| 2     | 435.37                       | 0.0043            | HOMO-2 $\rightarrow$ LUMO (13.63%)<br>HOMO-1 $\rightarrow$ LUMO (85.95%)                                       |
| 3     | 412.13                       | 0.0985            | HOMO-2 $\rightarrow$ LUMO (85.67%)<br>HOMO-1 $\rightarrow$ LUMO (13.68%)                                       |
| 4     | 399.86                       | 0.0045            | HOMO-3 $\rightarrow$ LUMO (96.39%)                                                                             |
| 5     | 394.25                       | 0.0055            | HOMO-4 $\rightarrow$ LUMO (95.65%)                                                                             |

**Table S30.** Molecular orbital distributions (in %) and energies (in eV) of **13PP** at their ground state ( $S_0$ ) and the first excited state ( $S_1$ ) fully optimized geometries in THF

|        | E (eV) | car-phenyl | carborane | bridged phenyl | terminal phenyl |
|--------|--------|------------|-----------|----------------|-----------------|
| $S_0$  |        |            |           |                |                 |
| LUMO+3 | -0.27  | 6.3        | 1.68      | 26.4           | 11.6            |
| LUMO+2 | -0.37  | 32.1       | 8.21      | 53.2           | 6.43            |
| LUMO+1 | -0.76  | 42.7       | 13.7      | 42.1           | 1.49            |
| LUMO   | -1.40  | 31.1       | 38.3      | 29.5           | 1.14            |
| HOMO   | -6.43  | 0.00       | 0.00      | 0.34           | 99.6            |
| HOMO-1 | -6.63  | 0.00       | 0.05      | 3.88           | 96.1            |
| HOMO-2 | -7.00  | 2.67       | 11.2      | 78.3           | 7.88            |
| HOMO-3 | -7.15  | 49.3       | 0.92      | 49.1           | 0.30            |
| $S_1$  |        |            |           |                |                 |
| LUMO+3 | -0.48  | 85.8       | 3.55      | 6.03           | 4.67            |
| LUMO+2 | -0.70  | 44.6       | 7.29      | 46.2           | 1.87            |
| LUMO+1 | -0.70  | 8.44       | 5.44      | 68.0           | 18.1            |
| LUMO   | -3.50  | 12.4       | 75.3      | 11.8           | 0.54            |
| HOMO   | -6.12  | 0.00       | 0.00      | 0.20           | 99.8            |
| HOMO-1 | -6.78  | 0.05       | 0.11      | 4.08           | 95.8            |
| HOMO-2 | -6.90  | 24.3       | 15.4      | 55.4           | 4.95            |
| HOMO-3 | -7.23  | 55.9       | 21.2      | 20.6           | 2.22            |

**Table S31.** Cartesian coordinates of the ground state ( $S_0$ ) fully optimized geometry of **1HF** in THF from B3LYP calculations (in Å)

| Atom | X        | Y         | Z         |   |           |           |           |   |           |           |           |
|------|----------|-----------|-----------|---|-----------|-----------|-----------|---|-----------|-----------|-----------|
|      |          |           |           | H | 4.722175  | 0.885040  | 1.206422  | C | -4.115945 | -0.360913 | 0.452855  |
| C    | 1.589259 | -1.057288 | 0.119742  | B | 3.969133  | -0.090656 | -1.075129 | H | -4.869138 | -0.161789 | 2.473265  |
| C    | 2.667941 | 0.333029  | -0.055707 | H | 4.394274  | 0.763092  | -1.774530 | H | -7.227664 | 0.058645  | 1.730077  |
| B    | 2.638910 | -0.583075 | 1.403211  | B | 4.857280  | -1.376547 | -0.227955 | H | -7.798235 | -0.015453 | -0.675970 |
| H    | 2.174195 | -0.100896 | 2.370658  | H | 6.031786  | -1.478097 | -0.353650 | H | -6.022513 | -0.311600 | -2.386889 |
| B    | 2.405058 | -2.290559 | 0.972918  | C | 0.107812  | -0.836992 | 0.273498  | C | 1.246960  | 3.660384  | -1.257331 |
| H    | 1.747169 | -2.961912 | 1.690559  | C | -0.467418 | -0.718293 | 1.551275  | C | 1.098747  | 4.359089  | -0.059470 |
| B    | 2.210550 | -2.361968 | -0.789255 | H | 0.164350  | -0.766238 | 2.429083  | C | 1.459199  | 3.746808  | 1.140497  |
| H    | 1.417815 | -3.082563 | -1.290465 | C | -1.840969 | -0.556058 | 1.717267  | C | 1.953795  | 2.443911  | 1.144976  |
| B    | 2.330071 | -0.696717 | -1.395148 | H | -2.255658 | -0.469419 | 2.717117  | C | 2.092066  | 1.725842  | -0.052350 |
| H    | 1.661053 | -0.287006 | -2.272329 | C | -2.663327 | -0.515278 | 0.590721  | C | 1.740859  | 2.357340  | -1.255182 |
| B    | 3.713314 | -1.785359 | -1.538263 | C | -2.098728 | -0.649260 | -0.693850 | H | 0.982680  | 4.129444  | -2.200171 |
| H    | 4.049878 | -2.179987 | -2.604249 | C | -0.731306 | -0.811415 | -0.855740 | H | 0.713669  | 5.374313  | -0.061944 |
| B    | 3.775370 | -2.774293 | -0.051911 | H | -0.312254 | -0.929676 | -1.847901 | H | 1.360864  | 4.283363  | 2.079201  |
| H    | 4.160625 | -3.895536 | -0.048854 | C | -5.114415 | -0.194683 | 1.415522  | H | 2.243679  | 1.990759  | 2.084552  |
| B    | 4.029658 | -1.668928 | 1.328219  | C | -6.439095 | -0.071043 | 0.994789  | H | 1.864599  | 1.835953  | -2.196106 |
| H    | 4.593537 | -1.980123 | 2.323413  | C | -6.761873 | -0.112923 | -0.366444 | C | -3.186385 | -0.591435 | -1.747034 |
| B    | 4.163398 | -0.018662 | 0.686905  | C | -5.763399 | -0.279519 | -1.331949 | H | -3.223297 | -1.509980 | -2.347470 |
|      |          |           |           | C | -4.441545 | -0.403232 | -0.919230 | H | -3.030707 | 0.235052  | -2.452904 |

**Table S32.** Cartesian coordinates of the first-excited state ( $S_1$ ) fully optimized geometry of **1HF** in THF from B3LYP calculations (in Å)

| Atom | X        | Y         | Z         |   |           |           |           |   |           |           |           |
|------|----------|-----------|-----------|---|-----------|-----------|-----------|---|-----------|-----------|-----------|
|      |          |           |           | H | 4.886308  | 0.114824  | 1.401818  | C | -4.337365 | -0.153688 | 0.432089  |
| C    | 1.243839 | -1.328480 | 0.060106  | B | 3.972698  | -0.467093 | -1.073017 | H | -5.110747 | -0.206499 | 2.467481  |
| C    | 2.983157 | 0.307079  | -0.049315 | H | 4.604524  | 0.209153  | -1.817811 | H | -7.417969 | 0.379370  | 1.754523  |
| B    | 2.367367 | -0.787062 | 1.206998  | B | 4.559472  | -1.949116 | -0.253708 | H | -7.934397 | 0.753856  | -0.633236 |
| H    | 1.957777 | -0.286445 | 2.201834  | H | 5.702632  | -2.263944 | -0.363905 | H | -6.179431 | 0.557033  | -2.378090 |
| B    | 1.962062 | -2.567802 | 0.857184  | C | -0.215392 | -1.035906 | 0.210741  | C | 2.306211  | 3.878224  | -1.091518 |
| H    | 1.286116 | -3.211042 | 1.592860  | C | -0.818999 | -1.066504 | 1.501150  | C | 2.307459  | 4.538316  | 0.141822  |
| B    | 1.799973 | -2.513892 | -0.926065 | H | -0.202780 | -1.308371 | 2.358368  | C | 2.528808  | 3.805078  | 1.312320  |
| H    | 0.999597 | -3.112816 | -1.568347 | C | -2.158106 | -0.782507 | 1.681826  | C | 2.740862  | 2.431484  | 1.253981  |
| B    | 2.153491 | -0.711649 | -1.234272 | H | -2.593052 | -0.797800 | 2.675587  | C | 2.741388  | 1.748623  | 0.016699  |
| H    | 1.585293 | -0.155629 | -2.114660 | C | -2.945168 | -0.475598 | 0.550912  | C | 2.516809  | 2.504687  | -1.155977 |
| B    | 3.367207 | -2.040921 | -1.590505 | C | -2.355539 | -0.465525 | -0.750006 | H | 2.141365  | 4.438291  | -2.007476 |
| H    | 3.665461 | -2.414996 | -2.680144 | C | -1.012523 | -0.745550 | -0.917098 | H | 2.140333  | 5.610000  | 0.189914  |
| B    | 3.280435 | -3.152435 | -0.178102 | H | -0.564895 | -0.736707 | -1.903690 | H | 2.537402  | 4.307757  | 2.275137  |
| H    | 3.533868 | -4.314149 | -0.235805 | C | -5.342459 | -0.040996 | 1.420988  | H | 2.914911  | 1.874551  | 2.168111  |
| B    | 3.621989 | -2.128551 | 1.261327  | C | -6.625540 | 0.284990  | 1.020123  | H | 2.516968  | 2.004878  | -2.118448 |
| H    | 4.107884 | -2.563381 | 2.256730  | C | -6.919748 | 0.498667  | -0.345357 | C | -3.397955 | -0.117887 | -1.788479 |
| B    | 4.130584 | -0.518715 | 0.739561  | C | -5.929789 | 0.388681  | -1.335718 | H | -3.518336 | -0.913134 | -2.534037 |
|      |          |           |           | C | -4.642698 | 0.064910  | -0.951261 | H | -3.138744 | 0.792787  | -2.341886 |

**Table S33.** Cartesian coordinates of the ground state ( $S_0$ ) fully optimized geometry of **2HT** in THF from B3LYP calculations (in Å)

| Atom | X         | Y         | Z         |   |           |           |           |   |           |           |           |
|------|-----------|-----------|-----------|---|-----------|-----------|-----------|---|-----------|-----------|-----------|
|      |           |           |           | B | -5.363079 | 1.322428  | -0.748046 | C | -1.728629 | -1.819770 | 3.355485  |
| C    | -2.163018 | 0.538547  | -0.909760 | H | -6.515012 | 1.594189  | -0.679808 | C | -2.176540 | -0.854974 | 2.454901  |
| C    | -3.258598 | -0.194750 | 0.260313  | C | -0.712301 | 0.135357  | -0.923737 | C | -2.733672 | -1.229168 | 1.223080  |
| B    | -2.755902 | 1.444028  | 0.433153  | C | -0.264867 | -0.951925 | -1.697554 | C | -2.848481 | -2.596421 | 0.928335  |
| H    | -2.011843 | 1.725490  | 1.300448  | H | -0.964623 | -1.530767 | -2.286362 | C | -2.401336 | -3.559195 | 1.830876  |
| B    | -2.643004 | 2.152164  | -1.191972 | C | 1.075569  | -1.280586 | -1.724946 | H | -1.485049 | -3.925934 | 3.748400  |
| H    | -1.780385 | 2.933443  | -1.401660 | H | 1.373980  | -2.121873 | -2.337453 | H | -1.299515 | -1.507029 | 4.302416  |
| B    | -3.016403 | 0.863365  | -2.353101 | C | 2.044916  | -0.557113 | -0.997693 | H | -2.100188 | 0.191861  | 2.719904  |
| H    | -2.409994 | 0.752969  | -3.362495 | C | 1.608367  | 0.555994  | -0.232521 | H | -3.299746 | -2.912661 | -0.003918 |
| B    | -3.349490 | -0.605418 | -1.412453 | C | 0.234186  | 0.870699  | -0.219703 | H | -2.501219 | -4.611276 | 1.582113  |
| H    | -2.999906 | -1.676736 | -1.751222 | H | -0.104737 | 1.724260  | 0.347465  | C | 3.958220  | 1.010887  | 0.485787  |
| B    | -4.688589 | 0.335167  | -2.075759 | C | 3.925722  | -2.034046 | -1.762700 | C | 4.869614  | 1.804884  | 1.217222  |
| H    | -5.340849 | -0.105710 | -2.961917 | C | 5.263523  | -2.382492 | -1.794216 | C | 2.580107  | 1.356742  | 0.521084  |
| B    | -4.258798 | 2.062610  | -1.926701 | C | 6.193966  | -1.618841 | -1.077605 | C | 4.456223  | 2.896643  | 1.958703  |
| H    | -4.604760 | 2.875524  | -2.717215 | C | 5.766162  | -0.526304 | -0.345137 | H | 5.925425  | 1.565017  | 1.205622  |
| B    | -4.080330 | 2.432473  | -0.187821 | C | 4.406016  | -0.147589 | -0.295482 | C | 2.184371  | 2.476007  | 1.286816  |
| H    | -4.293397 | 3.500042  | 0.281331  | C | 3.463294  | -0.921303 | -1.025110 | C | 3.097840  | 3.236060  | 1.994369  |
| B    | -4.436878 | 0.951329  | 0.724393  | H | 5.586451  | -3.243618 | -2.371170 | H | 5.184393  | 3.485363  | 2.508273  |
| H    | -4.815595 | 0.897066  | 1.843458  | H | 7.247568  | -1.880767 | -1.093216 | H | 1.140987  | 2.762701  | 1.330849  |
| B    | -4.809625 | -0.337596 | -0.436849 | H | 6.506603  | 0.044356  | 0.201178  | H | 2.759269  | 4.091076  | 2.571435  |
| H    | -5.449549 | -1.280232 | -0.119930 | C | -1.834414 | -3.175302 | 3.045961  | H | 3.224725  | -2.641737 | -2.321360 |

**Table S34.** Cartesian coordinates of the first-excited state ( $S_1$ ) fully optimized geometry of **2HT** in THF from B3LYP calculations (in Å)

| Atom | X         | Y         | Z         |   |           |           |           |  |   |           |           |           |
|------|-----------|-----------|-----------|---|-----------|-----------|-----------|--|---|-----------|-----------|-----------|
|      |           |           |           | B | -5.161813 | 1.952098  | -0.370336 |  | C | -2.893541 | -3.215703 | 2.408726  |
| C    | -1.868025 | 1.145288  | -0.736191 | H | -6.283487 | 2.346700  | -0.290634 |  | C | -3.077196 | -1.909721 | 1.960557  |
| C    | -3.598371 | -0.261147 | 0.140060  | C | -0.445507 | 0.746606  | -0.877573 |  | C | -3.392432 | -1.640868 | 0.612770  |
| B    | -2.671911 | 1.070481  | 0.773529  | C | 0.036906  | 0.151268  | -2.057231 |  | C | -3.514420 | -2.737755 | -0.264778 |
| H    | -2.013652 | 0.867568  | 1.741930  | H | -0.639784 | -0.018009 | -2.886806 |  | C | -3.330070 | -4.042623 | 0.186326  |
| B    | -2.346126 | 2.619197  | -0.214453 | C | 1.374113  | -0.230344 | -2.191465 |  | H | -2.871682 | -5.309269 | 1.875478  |
| H    | -1.491970 | 3.395025  | 0.074643  | H | 1.671815  | -0.680470 | -3.129770 |  | H | -2.655634 | -3.394319 | 3.453639  |
| B    | -2.678449 | 2.006148  | -1.864637 | C | 2.304498  | -0.041889 | -1.165892 |  | H | -2.983443 | -1.084522 | 2.658324  |
| H    | -2.082792 | 2.311551  | -2.847869 | C | 1.844805  | 0.574798  | 0.035228  |  | H | -3.761538 | -2.559641 | -1.305807 |
| B    | -3.121767 | 0.237707  | -1.461506 | C | 0.476387  | 0.952522  | 0.142419  |  | H | -3.434061 | -4.869306 | -0.510876 |
| H    | -2.815325 | -0.613518 | -2.231589 | H | 0.121493  | 1.422640  | 1.047548  |  | C | 4.167149  | 0.432490  | 0.978901  |
| B    | -4.368933 | 1.506546  | -1.919700 | C | 4.185925  | -1.086269 | -2.451410 |  | C | 5.046776  | 0.704232  | 2.057877  |
| H    | -4.943230 | 1.559235  | -2.961960 | C | 5.522668  | -1.473503 | -2.576117 |  | C | 2.765670  | 0.815082  | 1.116806  |
| B    | -3.889915 | 2.983635  | -1.011487 | C | 6.425762  | -1.235805 | -1.536407 |  | C | 4.602833  | 1.302900  | 3.211986  |
| H    | -4.133611 | 4.091930  | -1.375126 | C | 5.979333  | -0.614508 | -0.383858 |  | H | 6.092628  | 0.441877  | 1.985490  |
| B    | -3.836454 | 2.488928  | 0.717710  | C | 4.624319  | -0.208737 | -0.230926 |  | C | 2.350897  | 1.427368  | 2.331821  |
| H    | -4.020113 | 3.261428  | 1.605792  | C | 3.708534  | -0.452206 | -1.298356 |  | C | 3.236046  | 1.666309  | 3.351922  |
| B    | -4.511392 | 0.865417  | 0.881855  | H | 5.851933  | -1.962177 | -3.486935 |  | H | 5.297069  | 1.499309  | 4.021484  |
| H    | -5.071807 | 0.535634  | 1.876930  | H | 7.463605  | -1.535462 | -1.626795 |  | H | 1.318937  | 1.716092  | 2.467928  |
| B    | -4.844729 | 0.247194  | -0.777246 | H | 6.690001  | -0.443650 | 0.413037  |  | H | 2.894918  | 2.135383  | 4.267957  |
| H    | -5.664109 | -0.562855 | -1.069234 | C | -3.016042 | -4.291693 | 1.525225  |  | H | 3.519176  | -1.294486 | -3.277941 |

**Table S35.** Cartesian coordinates of the ground state ( $S_0$ ) fully optimized geometry of **3HB** in THF from B3LYP calculations (in Å)

| Atom | X        | Y         | Z         |   |           |           |           |   |           |           |           |
|------|----------|-----------|-----------|---|-----------|-----------|-----------|---|-----------|-----------|-----------|
|      |          |           |           | B | 4.260120  | -0.037238 | -0.859522 | H | -6.672175 | -0.338461 | -2.525021 |
| C    | 1.749520 | -1.060653 | -0.048463 | H | 4.768219  | 0.838405  | -1.470864 | H | -7.912123 | 0.022563  | -0.392952 |
| C    | 2.811220 | 0.343981  | -0.039219 | B | 5.033915  | -1.326284 | 0.090732  | H | -6.670552 | 0.106033  | 1.749346  |
| B    | 2.582634 | -0.600883 | 1.386703  | H | 6.215526  | -1.407076 | 0.142454  | C | 1.179457  | 4.343558  | -0.155912 |
| H    | 1.971534 | -0.139554 | 2.280337  | C | 0.258957  | -0.863228 | -0.130580 | C | 1.475631  | 3.738254  | 1.065130  |
| B    | 2.446637 | -2.302118 | 0.896983  | C | -0.406437 | -0.940713 | -1.376679 | C | 1.989822  | 2.443700  | 1.101739  |
| H    | 1.697749 | -2.995601 | 1.494217  | H | 0.160867  | -1.127114 | -2.279867 | C | 2.214206  | 1.727571  | -0.084030 |
| B    | 2.519609 | -2.339618 | -0.875501 | C | -1.776589 | -0.799399 | -1.461527 | C | 1.927480  | 2.352068  | -1.306979 |
| H    | 1.824207 | -3.063095 | -1.501283 | H | -2.237850 | -0.871639 | -2.439640 | C | 1.412218  | 3.646562  | -1.341051 |
| B    | 2.700181 | -0.662578 | -1.432515 | C | -2.574772 | -0.574055 | -0.317428 | H | 0.778066  | 5.352042  | -0.183813 |
| H    | 2.155097 | -0.252545 | -2.391418 | C | -1.911061 | -0.511897 | 0.941959  | H | 1.310892  | 4.273714  | 1.995113  |
| B    | 4.107423 | -1.727261 | -1.382865 | C | -0.508671 | -0.660816 | 1.006686  | H | 2.228815  | 1.995042  | 2.057962  |
| H    | 4.605907 | -2.097822 | -2.392455 | H | -0.039598 | -0.622337 | 1.982467  | H | 2.115891  | 1.832709  | -2.237965 |
| B    | 3.963040 | -2.743957 | 0.079450  | C | -4.758234 | -0.456153 | -1.575059 | H | 1.197236  | 4.109961  | -2.299046 |
| H    | 4.363504 | -3.859042 | 0.119588  | C | -6.132287 | -0.301739 | -1.583622 | C | -4.023810 | -0.156066 | 2.093300  |
| B    | 3.988703 | -1.662489 | 1.500668  | C | -6.833092 | -0.097653 | -0.380449 | C | -2.673217 | -0.301451 | 2.140051  |
| H    | 4.404319 | -1.982696 | 2.563610  | C | -6.141142 | -0.051198 | 0.813364  | H | -4.245934 | -0.610747 | -2.517944 |
| B    | 4.185467 | 0.001536  | 0.913046  | C | -4.736146 | -0.206236 | 0.848103  | H | -2.144816 | -0.261552 | 3.088479  |
| H    | 4.645668 | 0.902908  | 1.524800  | C | -4.020782 | -0.414738 | -0.368906 | H | -4.592714 | 0.002159  | 3.005443  |

**Table S36.** Cartesian coordinates of the first-excited state ( $S_1$ ) fully optimized geometry of **3HB** in THF from B3LYP calculations (in Å)

| Atom | X        | Y         | Z         |   |           |           |           |   |           |           |           |
|------|----------|-----------|-----------|---|-----------|-----------|-----------|---|-----------|-----------|-----------|
|      |          |           |           | B | 4.287343  | -0.495225 | -0.860153 | H | -6.908754 | 0.451990  | -2.520104 |
| C    | 1.399638 | -1.346774 | -0.095202 | H | 5.015805  | 0.168482  | -1.524707 | H | -8.139079 | 0.744929  | -0.377240 |
| C    | 3.147310 | 0.292088  | -0.004891 | B | 4.749296  | -1.952080 | 0.056259  | H | -6.908399 | 0.492537  | 1.771605  |
| B    | 2.382882 | -0.748317 | 1.168323  | H | 5.892451  | -2.284764 | 0.106917  | C | 2.524201  | 4.547362  | -0.007317 |
| H    | 1.844566 | -0.227867 | 2.090882  | C | -0.051605 | -1.035306 | -0.161235 | C | 2.582749  | 3.841953  | 1.197897  |
| B    | 2.019982 | -2.547295 | 0.825724  | C | -0.716227 | -0.911320 | -1.401203 | C | 2.779753  | 2.463168  | 1.200095  |
| H    | 1.253438 | -3.179788 | 1.479367  | H | -0.151819 | -1.050573 | -2.316050 | C | 2.927602  | 1.747833  | -0.006227 |
| B    | 2.100882 | -2.540717 | -0.963464 | C | -2.080952 | -0.614046 | -1.501019 | C | 2.868316  | 2.474927  | -1.212992 |
| H    | 1.400224 | -3.171585 | -1.688787 | H | -2.510395 | -0.535502 | -2.492527 | C | 2.671010  | 3.853744  | -1.211778 |
| B    | 2.492469 | -0.736289 | -1.254791 | C | -2.867166 | -0.424745 | -0.363450 | H | 2.369617  | 5.622098  | -0.007727 |
| H    | 2.039955 | -0.206375 | -2.217348 | C | -2.213652 | -0.555909 | 0.904951  | H | 2.476489  | 4.368718  | 2.142112  |
| B    | 3.738765 | -2.075928 | -1.424205 | C | -0.823330 | -0.860500 | 0.977827  | H | 2.827509  | 1.929096  | 2.143039  |
| H    | 4.176056 | -2.480888 | -2.455510 | H | -0.372372 | -0.953297 | 1.959556  | H | 2.984787  | 1.949993  | -2.155021 |
| B    | 3.465539 | -3.152207 | -0.008371 | C | -5.016476 | 0.040700  | -1.593209 | H | 2.633672  | 4.389616  | -2.156095 |
| H    | 3.723122 | -4.315546 | -0.002535 | C | -6.384100 | 0.344178  | -1.576751 | C | -4.321674 | -0.080492 | 2.052380  |
| B    | 3.608448 | -2.090081 | 1.437291  | C | -7.081102 | 0.510117  | -0.370108 | C | -2.955601 | -0.381806 | 2.088451  |
| H    | 3.949247 | -2.505497 | 2.500374  | C | -6.398403 | 0.369861  | 0.821631  | H | -4.528325 | -0.076069 | -2.552960 |
| B    | 4.206101 | -0.504170 | 0.940932  | C | -5.006883 | 0.060812  | 0.830740  | H | -2.458360 | -0.482803 | 3.047303  |
| H    | 4.871522 | 0.152111  | 1.675309  | C | -4.295946 | -0.108278 | -0.405380 | H | -4.864266 | 0.047134  | 2.983154  |



**Table S37.** Cartesian coordinates of the ground state ( $S_0$ ) fully optimized geometry of **4HN** in THF from B3LYP calculations (in Å)

| Atom | X         | Y         | Z         |   |           |           |           |   |           |           |           |
|------|-----------|-----------|-----------|---|-----------|-----------|-----------|---|-----------|-----------|-----------|
|      |           |           |           | B | -4.196933 | 0.013637  | 0.948924  | H | -0.821669 | 5.345962  | -0.354162 |
| C    | -1.776312 | -1.069040 | -0.048481 | H | -4.647639 | 0.921746  | 1.557938  | H | -1.424935 | 4.103252  | -2.424831 |
| C    | -2.844773 | 0.343719  | -0.036462 | B | -5.059982 | -1.327535 | 0.164396  | H | -2.336838 | 1.828541  | -2.283650 |
| B    | -2.756155 | -0.687268 | -1.415391 | H | -6.241597 | -1.410003 | 0.240756  | H | -2.074403 | 1.995210  | 2.011087  |
| H    | -2.240963 | -0.289919 | -2.394518 | C | -0.288014 | -0.875449 | -0.149939 | C | 6.076534  | 0.226064  | 0.672853  |
| B    | -2.566635 | -2.357320 | -0.839422 | C | 0.353946  | -0.856114 | -1.396717 | C | 4.689378  | 0.070138  | 0.728075  |
| H    | -1.887945 | -3.093113 | -1.469151 | H | -0.218612 | -0.951752 | -2.310648 | C | 4.004064  | -0.459856 | -0.389423 |
| B    | -2.457171 | -2.289491 | 0.929783  | C | 1.734495  | -0.714207 | -1.478880 | C | 4.743472  | -0.839476 | -1.522223 |
| H    | -1.702417 | -2.977995 | 1.525587  | H | 2.192453  | -0.676176 | -2.461292 | C | 6.126698  | -0.679422 | -1.563533 |
| B    | -2.582311 | -0.579520 | 1.395410  | C | 2.529480  | -0.599478 | -0.328161 | C | 6.797607  | -0.139626 | -0.464524 |
| H    | -1.953062 | -0.110997 | 2.270985  | C | 1.887862  | -0.617429 | 0.930621  | H | 6.596956  | 0.635285  | 1.535003  |
| B    | -3.985655 | -1.640706 | 1.556098  | C | 0.503224  | -0.758532 | 1.002555  | H | 4.238475  | -1.284790 | -2.373217 |
| H    | -4.380414 | -1.947675 | 2.631955  | H | 0.039952  | -0.784682 | 1.981942  | H | 6.679052  | -0.983966 | -2.447352 |
| B    | -3.989944 | -2.744192 | 0.152585  | C | -1.410097 | 3.734558  | 0.952833  | H | 7.876182  | -0.015562 | -0.487574 |
| H    | -4.391852 | -3.858996 | 0.220236  | C | -1.220807 | 4.338420  | -0.290665 | C | 3.897110  | 0.469108  | 1.953601  |
| B    | -4.163593 | -1.750838 | -1.320899 | C | -1.556938 | 3.641232  | -1.451555 | H | 3.499909  | 1.485977  | 1.819997  |
| H    | -4.686225 | -2.137261 | -2.313392 | C | -2.069222 | 2.347253  | -1.371631 | H | 4.549000  | 0.499042  | 2.831974  |
| B    | -4.306133 | -0.053884 | -0.820174 | C | -2.249975 | 1.725205  | -0.126324 | C | 2.729548  | -0.498505 | 2.181590  |
| H    | -4.832497 | 0.807350  | -1.436527 | C | -1.922013 | 2.440649  | 1.035990  | H | 2.113388  | -0.171192 | 3.024400  |
|      |           |           |           | H | -1.163268 | 4.269954  | 1.864216  | H | 3.129931  | -1.487929 | 2.446095  |

**Table S38.** Cartesian coordinates of the first-excited state ( $S_1$ ) fully optimized geometry of **4HN** in THF from B3LYP calculations (in Å)

| Atom | X         | Y         | Z         |   |           |           |           |   |           |           |           |
|------|-----------|-----------|-----------|---|-----------|-----------|-----------|---|-----------|-----------|-----------|
|      |           |           |           | B | -4.225230 | -0.363392 | 0.959106  | H | -2.186226 | 5.574704  | -0.616474 |
| C    | -1.453083 | -1.353040 | 0.049614  | H | -4.882614 | 0.376623  | 1.616052  | H | -2.496012 | 4.134690  | -2.624549 |
| C    | -3.157415 | 0.316865  | -0.055281 | B | -4.797263 | -1.886614 | 0.211540  | H | -2.932755 | 1.722568  | -2.368906 |
| B    | -2.499388 | -0.871609 | -1.195682 | H | -5.951401 | -2.173059 | 0.276466  | H | -2.769112 | 2.149665  | 1.912958  |
| H    | -2.019544 | -0.451286 | -2.196495 | C | 0.013282  | -1.088467 | -0.048434 | C | 6.220801  | 0.752186  | 0.578865  |
| B    | -2.156052 | -2.629619 | -0.700315 | C | 0.704810  | -1.307304 | -1.270612 | C | 4.856452  | 0.493903  | 0.662062  |
| H    | -1.456419 | -3.338359 | -1.348524 | H | 0.155737  | -1.662940 | -2.133927 | C | 4.222617  | -0.292645 | -0.363423 |
| B    | -2.091681 | -2.455065 | 1.080808  | C | 2.052672  | -1.047206 | -1.381185 | C | 5.019752  | -0.784187 | -1.434461 |
| H    | -1.343937 | -3.024330 | 1.807815  | H | 2.532182  | -1.185786 | -2.342544 | C | 6.371075  | -0.513859 | -1.493253 |
| B    | -2.424033 | -0.628115 | 1.242479  | C | 2.802892  | -0.566737 | -0.276092 | C | 6.979187  | 0.261443  | -0.484916 |
| H    | -1.898477 | -0.023578 | 2.117243  | C | 2.113011  | -0.358548 | 0.964289  | H | 6.696696  | 1.347118  | 1.351941  |
| B    | -3.683599 | -1.906418 | 1.618832  | C | 0.749066  | -0.620992 | 1.049981  | H | 4.570330  | -1.404593 | -2.199741 |
| H    | -4.050694 | -2.197811 | 2.712813  | H | 0.244908  | -0.455518 | 1.994841  | H | 6.969041  | -0.904930 | -2.309076 |
| B    | -3.543083 | -3.115375 | 0.294210  | C | -2.460464 | 3.941408  | 0.771225  | H | 8.042270  | 0.472874  | -0.533812 |
| H    | -3.824954 | -4.265571 | 0.416823  | C | -2.379153 | 4.512295  | -0.503105 | C | 4.020908  | 1.055187  | 1.776875  |
| B    | -3.779274 | -2.190073 | -1.229694 | C | -2.551686 | 3.701826  | -1.629884 | H | 3.580026  | 2.005182  | 1.440428  |
| H    | -4.216961 | -2.684971 | -2.219537 | C | -2.797242 | 2.339790  | -1.487523 | H | 4.649297  | 1.289253  | 2.639969  |
| B    | -4.280579 | -0.537670 | -0.849663 | C | -2.880831 | 1.746664  | -0.207944 | C | 2.886237  | 0.099406  | 2.168979  |
| H    | -4.982729 | 0.063016  | -1.596251 | C | -2.704452 | 2.579699  | 0.919446  | H | 2.216620  | 0.569667  | 2.893246  |
|      |           |           |           | H | -2.334304 | 4.561920  | 1.653793  | H | 3.319335  | -0.780931 | 2.666017  |

**Table S39.** Cartesian coordinates of the ground state ( $S_0$ ) fully optimized geometry of **5HH** in THF from B3LYP calculations (in Å)

| Atom | X         | Y         | Z         |   |           |           |           |   |           |           |           |
|------|-----------|-----------|-----------|---|-----------|-----------|-----------|---|-----------|-----------|-----------|
|      |           |           |           | H | -4.517563 | 0.960848  | -1.407177 | C | 5.051566  | -1.183125 | 0.836601  |
| C    | -1.544059 | -1.067191 | -0.074058 | B | -4.013387 | -0.094118 | 0.906470  | C | 4.252326  | -0.428418 | -0.038593 |
| C    | -2.608142 | 0.333237  | 0.035792  | H | -4.492478 | 0.748009  | 1.584692  | H | 6.741914  | 1.337216  | -1.568010 |
| B    | -2.448169 | -0.539507 | -1.442966 | B | -4.831400 | -1.338035 | -0.066397 | H | 8.133623  | -0.017707 | -0.014389 |
| H    | -1.879607 | -0.034498 | -2.341013 | H | -6.014007 | -1.421060 | -0.063446 | H | 7.037184  | -1.636568 | 1.523016  |
| B    | -2.285066 | -2.262110 | -1.043659 | C | -0.051754 | -0.869359 | -0.065049 | C | -0.983413 | 4.329663  | 0.283633  |
| H    | -1.566021 | -2.922796 | -1.710881 | C | 0.675574  | -0.941515 | 1.132354  | C | -1.304759 | 3.775539  | -0.955223 |
| B    | -2.271317 | -2.388278 | 0.726293  | H | 0.160777  | -1.113059 | 2.069554  | C | -1.816493 | 2.481927  | -1.035636 |
| H    | -1.543663 | -3.137741 | 1.280732  | C | 2.058856  | -0.798469 | 1.139434  | C | -2.012714 | 1.715378  | 0.123236  |
| B    | -2.426074 | -0.740701 | 1.371341  | H | 2.587622  | -0.832721 | 2.086657  | C | -1.701125 | 2.288754  | 1.365106  |
| H    | -1.838841 | -0.373700 | 2.322743  | C | 2.776512  | -0.583578 | -0.047909 | C | -1.188610 | 3.582416  | 1.443026  |
| B    | -3.833038 | -1.806864 | 1.338935  | C | 2.045776  | -0.528897 | -1.245454 | H | -0.584490 | 5.337625  | 0.345561  |
| H    | -4.281439 | -2.227248 | 2.352509  | H | 2.570081  | -0.403554 | -2.187474 | H | -1.162416 | 4.350646  | -1.865035 |
| B    | -3.759071 | -2.750386 | -0.176557 | C | 0.662159  | -0.670477 | -1.255910 | H | -2.075516 | 2.073770  | -2.004598 |
| H    | -4.159349 | -3.863692 | -0.252634 | H | 0.139473  | -0.646066 | -2.203917 | H | -1.868933 | 1.730030  | 2.277112  |
| B    | -3.855984 | -1.600490 | -1.540255 | C | 4.886688  | 0.477709  | -0.905055 | H | -0.954432 | 4.005756  | 2.414950  |
| H    | -4.322134 | -1.871144 | -2.595990 | C | 6.272511  | 0.624668  | -0.896028 | H | 4.286063  | 1.090014  | -1.570951 |
| B    | -4.027144 | 0.032122  | -0.863535 | C | 7.053789  | -0.131866 | -0.021069 | H | 4.584855  | -1.909522 | 1.495014  |
|      |           |           |           | C | 6.437404  | -1.036562 | 0.844909  |   |           |           |           |

**Table S40.** Cartesian coordinates of the first-excited state ( $S_1$ ) fully optimized geometry of **5HH** in THF from B3LYP calculations (in Å)

| Atom | X         | Y         | Z         |   |           |           |           |   |           |           |           |
|------|-----------|-----------|-----------|---|-----------|-----------|-----------|---|-----------|-----------|-----------|
|      |           |           |           | H | -4.704815 | 0.095451  | -1.616175 | C | 5.126025  | 0.451827  | 1.147390  |
| C    | -1.175431 | -1.329008 | 0.033661  | B | -3.996593 | -0.480139 | 0.924027  | C | 4.493501  | -0.134092 | 0.009446  |
| C    | -2.926563 | 0.296121  | -0.013301 | H | -4.693411 | 0.193033  | 1.611282  | H | 7.260064  | -0.354519 | -2.000431 |
| B    | -2.204218 | -0.789245 | -1.207440 | B | -4.504536 | -1.966427 | 0.060575  | H | 8.312907  | 0.687188  | -0.001491 |
| H    | -1.716839 | -0.286996 | -2.165403 | H | -5.650674 | -2.289165 | 0.073777  | H | 6.936199  | 1.206181  | 2.004777  |
| B    | -1.815605 | -2.569146 | -0.826033 | C | 0.283392  | -1.030739 | 0.025058  | C | -2.271741 | 4.533651  | -0.137997 |
| H    | -1.073849 | -3.206483 | -1.501096 | C | 1.006077  | -0.893095 | 1.234468  | C | -2.376600 | 3.800394  | -1.324689 |
| B    | -1.812294 | -2.516903 | 0.967025  | H | 0.490785  | -1.023137 | 2.178367  | C | -2.581076 | 2.424938  | -1.287362 |
| H    | -1.067584 | -3.115537 | 1.673379  | C | 2.352501  | -0.590080 | 1.232284  | C | -2.691860 | 1.740456  | -0.056074 |
| B    | -2.196089 | -0.717374 | 1.243909  | H | 2.868303  | -0.508181 | 2.181446  | C | -2.584713 | 2.496556  | 1.132937  |
| H    | -1.702173 | -0.157736 | 2.166341  | C | 3.074969  | -0.439882 | 0.014254  | C | -2.379971 | 3.871814  | 1.089604  |
| B    | -3.431304 | -2.053400 | 1.493091  | C | 2.347156  | -0.611836 | -1.197890 | H | -2.109912 | 5.606762  | -0.169520 |
| H    | -3.821699 | -2.429274 | 2.552535  | H | 2.844706  | -0.480864 | -2.151219 | H | -2.299714 | 4.304565  | -2.283676 |
| B    | -3.215937 | -3.162137 | 0.092130  | C | 0.996125  | -0.894169 | -1.189874 | H | -2.664137 | 1.867871  | -2.214130 |
| H    | -3.466055 | -4.325467 | 0.127283  | H | 0.468462  | -1.001228 | -2.129660 | H | -2.670614 | 1.995081  | 2.090681  |
| B    | -3.438368 | -2.137917 | -1.371021 | C | 5.304601  | -0.409595 | -1.132524 | H | -2.305631 | 4.431757  | 2.017344  |
| H    | -3.833038 | -2.577695 | -2.403971 | C | 6.656392  | -0.123427 | -1.129724 | H | 4.866504  | -0.884709 | -2.001319 |
| B    | -4.003508 | -0.535621 | -0.894370 | C | 7.252378  | 0.458815  | 0.001891  | H | 4.536052  | 0.706660  | 2.018823  |
|      |           |           |           | C | 6.476243  | 0.746018  | 1.137205  |   |           |           |           |

**Table S41.** Cartesian coordinates of the ground state ( $S_0$ ) fully optimized geometry of **6HC** in THF from B3LYP calculations (in Å)

| Atom | X        | Y         | Z         |   |           |           |           |  |   |           |           |           |
|------|----------|-----------|-----------|---|-----------|-----------|-----------|--|---|-----------|-----------|-----------|
|      |          |           |           | H | 6.958652  | -0.566052 | 0.724923  |  | C | 1.968195  | 2.482344  | 0.250594  |
| C    | 2.529129 | -1.126502 | 0.311332  | C | 1.037125  | -1.236719 | 0.143125  |  | C | 2.528524  | 1.541015  | -0.625549 |
| C    | 3.338412 | 0.381775  | -0.102532 | C | 0.164204  | -0.909760 | 1.191376  |  | C | 2.370841  | 1.735294  | -2.006410 |
| B    | 3.150687 | -0.092848 | 1.543615  | H | 0.559810  | -0.565983 | 2.138908  |  | H | 1.550584  | 2.959759  | -3.567080 |
| H    | 2.395811 | 0.497652  | 2.225890  | C | -1.213376 | -1.037530 | 1.045962  |  | H | 0.539859  | 4.603747  | -1.995339 |
| B    | 3.339309 | -1.856799 | 1.624607  | H | -1.857138 | -0.782073 | 1.879296  |  | H | 0.829742  | 4.289843  | 0.457556  |
| H    | 2.669244 | -2.453918 | 2.394698  | C | -1.777221 | -1.504921 | -0.151198 |  | H | 2.096505  | 2.371258  | 1.319774  |
| B    | 3.568465 | -2.436117 | -0.037104 | C | -0.897866 | -1.855511 | -1.188925 |  | H | 2.816629  | 1.038502  | -2.705192 |
| H    | 3.056158 | -3.433268 | -0.413887 | H | -1.300832 | -2.221632 | -2.128216 |  | H | -2.973958 | -3.670543 | -1.102916 |
| B    | 3.513780 | -1.014139 | -1.099232 | C | 0.480228  | -1.725202 | -1.047332 |  | C | -3.836775 | 0.640433  | 0.599672  |
| H    | 2.994514 | -1.024461 | -2.155250 | H | 1.122674  | -2.011826 | -1.870580 |  | C | -3.211515 | 1.636762  | -0.182934 |
| B    | 5.069340 | -1.730152 | -0.670554 | C | -4.198388 | -0.704205 | 0.046127  |  | C | -4.197521 | 0.933399  | 1.924492  |
| H    | 5.707383 | -2.297627 | -1.492793 | C | -5.562292 | -0.994506 | -0.116340 |  | C | -2.945370 | 2.878875  | 0.408120  |
| B    | 4.972228 | -2.245967 | 1.037271  | C | -5.997555 | -2.211487 | -0.636782 |  | C | -3.922417 | 2.174777  | 2.495234  |
| H    | 5.547130 | -3.197877 | 1.448220  | C | -5.060004 | -3.173886 | -1.007515 |  | C | -3.286212 | 3.152241  | 1.731866  |
| B    | 4.697679 | -0.788286 | 2.032860  | C | -3.703087 | -2.907915 | -0.846243 |  | H | -2.467198 | 3.649043  | -0.191794 |
| H    | 5.068023 | -0.679326 | 3.153611  | C | -3.246165 | -1.687551 | -0.318804 |  | H | -4.205285 | 2.374984  | 3.524448  |
| B    | 4.665536 | 0.615693  | 0.946082  | H | -6.287681 | -0.234768 | 0.159447  |  | H | -3.066955 | 4.126613  | 2.159018  |
| H    | 4.913851 | 1.732726  | 1.244945  | H | -7.060126 | -2.403359 | -0.752600 |  | C | -2.846912 | 1.407193  | -1.630872 |
| B    | 4.893738 | 0.036203  | -0.715395 | H | -5.380507 | -4.130395 | -1.409406 |  | H | -3.632747 | 0.862549  | -2.162430 |
| H    | 5.301479 | 0.753298  | -1.562877 | C | 1.657776  | 2.828400  | -2.494689 |  | H | -2.684396 | 2.359274  | -2.143294 |
| B    | 5.788438 | -0.724061 | 0.619387  | C | 1.092516  | 3.750401  | -1.613748 |  | H | -1.926625 | 0.820514  | -1.726316 |
|      |          |           |           | C | 1.254503  | 3.574474  | -0.239809 |  | H | -4.693258 | 0.165579  | 2.512238  |

**Table S42.** Cartesian coordinates of the first-excited state ( $S_1$ ) fully optimized geometry of **6HC** in THF from B3LYP calculations (in Å)

| Atom | X        | Y         | Z         |   |           |           |           |   |           |           |           |
|------|----------|-----------|-----------|---|-----------|-----------|-----------|---|-----------|-----------|-----------|
|      |          |           |           | H | 6.765548  | -1.207613 | 0.700856  | C | 2.495227  | 2.671512  | 0.321309  |
| C    | 2.193227 | -1.545306 | 0.359310  | C | 0.719502  | -1.608256 | 0.210996  | C | 2.867675  | 1.668701  | -0.599128 |
| C    | 3.466222 | 0.405054  | -0.142862 | C | -0.139576 | -1.131754 | 1.212554  | C | 2.650904  | 1.922851  | -1.970398 |
| B    | 2.939230 | -0.355329 | 1.339724  | H | 0.274732  | -0.759260 | 2.141851  | H | 1.937298  | 3.293132  | -3.460944 |
| H    | 2.253775 | 0.287047  | 2.064893  | C | -1.519906 | -1.119985 | 1.032201  | H | 1.288728  | 5.041862  | -1.809121 |
| B    | 3.044635 | -2.193841 | 1.595999  | H | -2.152915 | -0.780372 | 1.844140  | H | 1.668257  | 4.630410  | 0.619405  |
| H    | 2.432322 | -2.758864 | 2.443965  | C | -2.104244 | -1.588289 | -0.165672 | H | 2.656784  | 2.505382  | 1.380794  |
| B    | 3.213546 | -2.733880 | -0.105699 | C | -1.246489 | -2.138044 | -1.140045 | H | 2.933815  | 1.172221  | -2.700225 |
| H    | 2.730813 | -3.716489 | -0.569728 | H | -1.660342 | -2.511493 | -2.071433 | H | -3.664299 | -3.461558 | -1.289545 |
| B    | 3.168724 | -1.095754 | -0.980881 | C | 0.127240  | -2.139143 | -0.960503 | C | -3.715445 | 0.861027  | 0.541275  |
| H    | 2.646479 | -1.036139 | -2.045277 | H | 0.764712  | -2.531455 | -1.744584 | C | -2.644178 | 1.564623  | -0.125928 |
| B    | 4.712727 | -2.053231 | -0.741814 | C | -4.325678 | -0.367747 | 0.023309  | C | -4.237901 | 1.395150  | 1.750066  |
| H    | 5.287815 | -2.645211 | -1.600467 | C | -5.736573 | -0.423062 | -0.059944 | C | -2.080096 | 2.674291  | 0.514516  |
| B    | 4.637667 | -2.650301 | 0.952220  | C | -6.374702 | -1.506802 | -0.636245 | C | -3.660781 | 2.493445  | 2.351086  |
| H    | 5.172967 | -3.647956 | 1.323232  | C | -5.615599 | -2.593617 | -1.107962 | C | -2.562370 | 3.132919  | 1.733184  |
| B    | 4.443257 | -1.183826 | 1.973649  | C | -4.232569 | -2.590703 | -0.982262 | H | -1.265755 | 3.199990  | 0.026239  |
| H    | 4.824261 | -1.136957 | 3.101111  | C | -3.555357 | -1.508353 | -0.396801 | H | -4.035144 | 2.855356  | 3.302106  |
| B    | 4.644136 | 0.256372  | 0.972349  | H | -6.316210 | 0.433227  | 0.267054  | H | -2.110948 | 4.000516  | 2.202301  |
| H    | 5.082903 | 1.261777  | 1.430047  | H | -7.454535 | -1.511644 | -0.736789 | C | -2.193084 | 1.251772  | -1.526849 |
| B    | 4.814177 | -0.289606 | -0.738294 | H | -6.114514 | -3.451964 | -1.545681 | H | -2.778745 | 0.466508  | -2.000710 |
| H    | 5.383350 | 0.292605  | -1.604271 | C | 2.088140  | 3.122463  | -2.398726 | H | -2.279740 | 2.155246  | -2.140007 |
| B    | 5.579770 | -1.210692 | 0.583500  | C | 1.723284  | 4.105164  | -1.473280 | H | -1.137776 | 0.961042  | -1.537686 |
|      |          |           |           | C | 1.934941  | 3.871252  | -0.110693 | H | -5.053854 | 0.876126  | 2.239658  |

**Table S43.** Cartesian coordinates of the ground state ( $S_0$ ) fully optimized geometry of **7HD** in THF from B3LYP calculations (in Å)

| Atom | X        | Y         | Z         |   |           |           |           |   |           |           |           |
|------|----------|-----------|-----------|---|-----------|-----------|-----------|---|-----------|-----------|-----------|
|      |          |           |           | C | 1.181173  | -1.231145 | 0.069845  | C | 2.657443  | 1.782853  | -1.987056 |
| C    | 2.666392 | -1.134142 | 0.292930  | C | 0.278121  | -0.956440 | 1.108200  | H | 1.934952  | 3.046379  | -3.564701 |
| C    | 3.502496 | 0.380958  | -0.063694 | H | 0.642943  | -0.660755 | 2.084042  | H | 0.803317  | 4.636424  | -2.019294 |
| B    | 3.244132 | -0.121311 | 1.564564  | C | -1.094551 | -1.076185 | 0.915169  | H | 0.925682  | 4.253894  | 0.437543  |
| H    | 2.467793 | 0.459342  | 2.229262  | H | -1.758854 | -0.865706 | 1.744293  | H | 2.145237  | 2.322128  | 1.331938  |
| B    | 3.420480 | -1.888378 | 1.623866  | C | -1.623116 | -1.481207 | -0.320495 | H | 3.152800  | 1.109193  | -2.675248 |
| H    | 2.721752 | -2.495799 | 2.359641  | C | -0.712964 | -1.775754 | -1.349799 | H | -2.786611 | -3.594491 | -1.425427 |
| B    | 3.711942 | -2.442644 | -0.036095 | H | -1.085785 | -2.092214 | -2.318758 | C | -3.697932 | 0.642243  | 0.437966  |
| H    | 3.213186 | -3.432346 | -0.448962 | C | 0.660652  | -1.654663 | -1.161497 | C | -3.151208 | 1.679863  | -0.349603 |
| B    | 3.705882 | -1.002008 | -1.075349 | H | 1.324132  | -1.897259 | -1.982042 | C | -3.974199 | 0.859201  | 1.807304  |
| H    | 3.234032 | -0.991725 | -2.152278 | C | -4.048113 | -0.675697 | -0.191948 | C | -2.868353 | 2.912575  | 0.252114  |
| B    | 5.239891 | -1.735331 | -0.596754 | C | -5.400396 | -0.930154 | -0.471523 | C | -3.673311 | 2.104118  | 2.373410  |
| H    | 5.909724 | -2.293819 | -1.401016 | C | -5.815896 | -2.111491 | -1.083193 | C | -3.121804 | 3.126613  | 1.604692  |
| B    | 5.072287 | -2.278160 | 1.096110  | C | -4.868428 | -3.073594 | -1.432311 | H | -2.448032 | 3.711096  | -0.353411 |
| H    | 5.626979 | -3.240425 | 1.514650  | C | -3.521836 | -2.837933 | -1.168502 | H | -3.875986 | 2.268320  | 3.428434  |
| B    | 4.766901 | -0.835760 | 2.103444  | C | -3.086050 | -1.651612 | -0.550403 | H | -2.895613 | 4.087966  | 2.057160  |
| H    | 5.095305 | -0.749764 | 3.240156  | H | -6.134540 | -0.172988 | -0.211229 | C | -4.582254 | -0.223024 | 2.673448  |
| B    | 4.787095 | 0.585930  | 1.041066  | H | -6.869836 | -2.276343 | -1.285984 | H | -4.553658 | 0.064724  | 3.727515  |
| H    | 5.034530 | 1.694478  | 1.370678  | H | -5.173610 | -4.003163 | -1.903134 | H | -5.628258 | -0.413686 | 2.409153  |
| B    | 5.077027 | 0.032083  | -0.618794 | C | 1.970605  | 2.885560  | -2.491839 | H | -4.057106 | -1.177965 | 2.566900  |
| H    | 5.528722 | 0.757080  | -1.436532 | C | 1.337825  | 3.777607  | -1.625208 | C | -2.877458 | 1.491994  | -1.824524 |
| B    | 5.912896 | -0.756082 | 0.736679  | C | 1.405540  | 3.563049  | -0.248311 | H | -3.740142 | 1.062550  | -2.343535 |
| H    | 7.080491 | -0.609377 | 0.891632  | C | 2.093508  | 2.461952  | 0.259710  | H | -2.635858 | 2.447549  | -2.297018 |
|      |          |           |           | C | 2.721216  | 1.551116  | -0.603766 | H | -2.032943 | 0.815031  | -1.994812 |

**Table S44.** Cartesian coordinates of the first-excited state ( $S_1$ ) fully optimized geometry of **7HD** in THF from B3LYP calculations (in Å)

| Atom | X         | Y         | Z         |   |           |           |           |   |           |           |           |
|------|-----------|-----------|-----------|---|-----------|-----------|-----------|---|-----------|-----------|-----------|
| C    | -2.346343 | -1.543325 | -0.374684 | C | -0.878378 | -1.620753 | -0.184245 | C | -2.850184 | 1.910349  | 1.972244  |
| C    | -3.618730 | 0.413913  | 0.107073  | C | 0.013344  | -1.150460 | -1.159009 | H | -2.175124 | 3.263329  | 3.496242  |
| B    | -3.053430 | -0.337259 | -1.365059 | H | -0.370146 | -0.771068 | -2.098741 | H | -1.468820 | 5.023886  | 1.880907  |
| H    | -2.341140 | 0.305783  | -2.063415 | C | 1.388501  | -1.155423 | -0.939772 | H | -1.775391 | 4.635594  | -0.561736 |
| B    | -3.166234 | -2.172643 | -1.642117 | H | 2.046623  | -0.825447 | -1.735149 | H | -2.751289 | 2.522877  | -1.371952 |
| H    | -2.533827 | -2.735340 | -2.476846 | C | 1.935255  | -1.631425 | 0.272549  | H | -3.158756 | 1.154612  | 2.686234  |
| B    | -3.390096 | -2.726873 | 0.048656  | C | 1.043619  | -2.172324 | 1.221323  | H | 3.453853  | -3.517154 | 1.439534  |
| H    | -2.929511 | -3.717783 | 0.517629  | H | 1.426640  | -2.551321 | 2.163645  | C | 3.540123  | 0.806436  | -0.371556 |
| B    | -3.357797 | -1.096290 | 0.939372  | C | -0.324474 | -2.159554 | 1.002413  | C | 2.517540  | 1.513565  | 0.373167  |
| H    | -2.867497 | -1.050377 | 2.019585  | H | -0.987829 | -2.546480 | 1.767540  | C | 3.968557  | 1.309091  | -1.644583 |
| B    | -4.901735 | -2.039307 | 0.646353  | C | 4.158699  | -0.410983 | 0.182599  | C | 1.904403  | 2.627136  | -0.205252 |
| H    | -5.506906 | -2.634282 | 1.482036  | C | 5.554242  | -0.432177 | 0.389734  | C | 3.320259  | 2.417989  | -2.165590 |
| B    | -4.781242 | -2.621637 | -1.050370 | C | 6.167609  | -1.507754 | 1.011129  | C | 2.293560  | 3.077585  | -1.457511 |
| H    | -5.313220 | -3.611512 | -1.446305 | C | 5.400121  | -2.617904 | 1.402920  | H | 1.131972  | 3.151921  | 0.346940  |
| B    | -4.544663 | -1.147584 | -2.051857 | C | 4.030567  | -2.638033 | 1.173891  | H | 3.589809  | 2.772548  | -3.154981 |
| H    | -4.891364 | -1.087722 | -3.189785 | C | 3.378771  | -1.558040 | 0.554939  | H | 1.815811  | 3.946774  | -1.896757 |
| B    | -4.764474 | 0.284884  | -1.043735 | H | 6.140619  | 0.439403  | 0.122563  | C | 5.021785  | 0.618818  | -2.481071 |
| H    | -5.181892 | 1.297854  | -1.504781 | H | 7.234485  | -1.485763 | 1.205458  | H | 4.938893  | 0.936501  | -3.522397 |
| B    | -4.989387 | -0.275044 | 0.655764  | H | 5.881176  | -3.471123 | 1.869842  | H | 6.033614  | 0.867285  | -2.144876 |
| H    | -5.579567 | 0.304059  | 1.509725  | C | -2.294413 | 3.102956  | 2.428406  | H | 4.927571  | -0.469044 | -2.445277 |
| B    | -5.722529 | -1.177895 | -0.696428 | C | -1.897035 | 4.092257  | 1.523441  | C | 2.167369  | 1.185118  | 1.799430  |
| H    | -6.904295 | -1.164305 | -0.848798 | C | -2.068296 | 3.871570  | 0.153076  | H | 2.393630  | 2.052298  | 2.430462  |
|      |           |           |           | C | -2.621174 | 2.678701  | -0.306564 | H | 1.093741  | 0.995674  | 1.894481  |
|      |           |           |           | C | -3.026664 | 1.669834  | 0.592916  | H | 2.714270  | 0.333561  | 2.197580  |



**Table S45.** Cartesian coordinates of the ground state ( $S_0$ ) fully optimized geometry of **8HP** in THF from B3LYP calculations (in Å)

| Atom | X        | Y         | Z         |   |           |           |           |   |           |           |           |
|------|----------|-----------|-----------|---|-----------|-----------|-----------|---|-----------|-----------|-----------|
|      |          |           |           | B | 5.663276  | -0.795697 | -0.668688 | C | -4.545384 | 1.308153  | -1.589440 |
| C    | 2.400818 | -1.125072 | -0.306260 | H | 6.836345  | -0.666323 | -0.795026 | C | -4.243404 | 2.606137  | -2.003687 |
| C    | 3.256479 | 0.366113  | 0.105993  | C | 0.909614  | -1.203205 | -0.119001 | C | -3.342530 | 3.383582  | -1.273894 |
| B    | 3.411951 | -1.043139 | 1.087435  | C | 0.355081  | -1.646971 | 1.090030  | C | -2.746842 | 2.853153  | -0.126918 |
| H    | 2.918303 | -1.055163 | 2.154267  | H | 0.996357  | -1.916249 | 1.919912  | C | -3.046870 | 1.555427  | 0.285129  |
| B    | 3.415754 | -2.458899 | 0.014407  | C | -1.024349 | -1.757054 | 1.243276  | C | -3.949204 | 0.760326  | -0.441254 |
| H    | 2.890857 | -3.448739 | 0.393032  | H | -1.425433 | -2.092991 | 2.194329  | H | -5.239206 | 0.705226  | -2.168073 |
| B    | 3.171914 | -1.861403 | -1.638097 | C | -1.902432 | -1.428757 | 0.199043  | H | -4.710074 | 3.007259  | -2.898682 |
| H    | 2.479256 | -2.438741 | -2.403216 | C | -1.341907 | -1.002275 | -1.015432 | H | -3.107068 | 4.393851  | -1.595243 |
| B    | 3.024369 | -0.093341 | -1.539535 | C | 0.035435  | -0.894085 | -1.173420 | H | -2.046396 | 3.449615  | 0.450083  |
| H    | 2.271782 | 0.519664  | -2.203025 | H | 0.427957  | -0.580753 | -2.132858 | H | -2.585593 | 1.156692  | 1.182854  |
| B    | 4.546464 | -0.822126 | -2.062012 | C | 1.315499  | 3.642640  | 0.283140  | H | -1.990070 | -0.763509 | -1.851438 |
| H    | 4.902425 | -0.714786 | -3.188572 | C | 1.133509  | 3.793270  | 1.658504  | C | -5.688718 | -0.911846 | 0.146938  |
| B    | 4.804158 | -2.293197 | -1.083015 | C | 1.635874  | 2.824578  | 2.528327  | C | -4.322397 | -0.610037 | 0.016514  |
| H    | 5.350963 | -3.255501 | -1.511681 | C | 2.308730  | 1.711096  | 2.028019  | C | -3.373533 | -1.603947 | 0.365531  |
| B    | 4.943238 | -1.793409 | 0.625613  | C | 2.486052  | 1.543732  | 0.645471  | C | -3.833080 | -2.839131 | 0.854000  |
| H    | 5.584073 | -2.383446 | 1.430963  | C | 1.987075  | 2.529374  | -0.220170 | C | -5.192049 | -3.115393 | 0.983992  |
| B    | 4.811762 | -0.024447 | 0.687510  | H | 0.940391  | 4.394290  | -0.404139 | C | -6.126914 | -2.146540 | 0.620547  |
| H    | 5.255693 | 0.673288  | 1.532895  | H | 0.613365  | 4.662290  | 2.049531  | H | -6.415907 | -0.145360 | -0.103306 |
| B    | 4.568281 | 0.572649  | -0.965037 | H | 1.510756  | 2.934581  | 3.600876  | H | -3.104726 | -3.604490 | 1.104452  |
| H    | 4.843922 | 1.683487  | -1.262767 | H | 2.704855  | 0.979243  | 2.720757  | H | -5.515423 | -4.082464 | 1.356792  |
|      |          |           |           | H | 2.129906  | 2.438765  | -1.289631 | H | -7.190454 | -2.344309 | 0.714118  |

**Table S46.** Cartesian coordinates of the first-excited state ( $S_1$ ) fully optimized geometry of **8HP** in THF from B3LYP calculations (in Å)

| Atom | X        | Y         | Z         |   |           |           |           |  |   |           |           |           |
|------|----------|-----------|-----------|---|-----------|-----------|-----------|--|---|-----------|-----------|-----------|
|      |          |           |           | B | 5.496709  | -1.267978 | -0.651149 |  | C | -4.494391 | 1.668554  | -1.484426 |
| C    | 2.112200 | -1.516214 | -0.326635 | H | 6.678535  | -1.294111 | -0.800569 |  | C | -3.967707 | 2.878484  | -1.895157 |
| C    | 3.446021 | 0.407717  | 0.118293  | C | 0.639233  | -1.549866 | -0.152566 |  | C | -2.822693 | 3.403988  | -1.265096 |
| B    | 3.133609 | -1.080726 | 0.979882  | C | 0.056841  | -1.988037 | 1.058893  |  | C | -2.205785 | 2.701744  | -0.224463 |
| H    | 2.646522 | -0.994301 | 2.058884  | H | 0.698856  | -2.322816 | 1.865441  |  | C | -2.710358 | 1.474646  | 0.176276  |
| B    | 3.115062 | -2.727356 | 0.120430  | C | -1.316941 | -1.976833 | 1.244687  |  | C | -3.867353 | 0.919616  | -0.451290 |
| H    | 2.620021 | -3.692418 | 0.607607  | H | -1.727875 | -2.287203 | 2.200194  |  | H | -5.360973 | 1.259065  | -1.990417 |
| B    | 2.911617 | -2.196509 | -1.580623 | C | -2.180081 | -1.504892 | 0.233978  |  | H | -4.432892 | 3.422965  | -2.709470 |
| H    | 2.260911 | -2.752393 | -2.405709 | C | -1.602803 | -1.110486 | -0.994787 |  | H | -2.423812 | 4.360454  | -1.585714 |
| B    | 2.857109 | -0.353766 | -1.340188 | C | -0.225987 | -1.140577 | -1.181473 |  | H | -1.334041 | 3.114640  | 0.270823  |
| H    | 2.163213 | 0.295026  | -2.051507 | H | 0.185192  | -0.835395 | -2.136460 |  | H | -2.253779 | 0.951356  | 1.005812  |
| B    | 4.322993 | -1.225656 | -2.008717 | C | 1.954263  | 3.891559  | 0.118467  |  | H | -2.242653 | -0.810851 | -1.817632 |
| H    | 4.672037 | -1.199202 | -3.147054 | C | 1.833571  | 4.151484  | 1.487274  |  | C | -5.852942 | -0.457611 | 0.060196  |
| B    | 4.510262 | -2.687275 | -0.979077 | C | 2.248595  | 3.181605  | 2.405314  |  | C | -4.441947 | -0.346586 | -0.007049 |
| H    | 5.010188 | -3.700769 | -1.356268 | C | 2.769533  | 1.968518  | 1.963627  |  | C | -3.634479 | -1.455544 | 0.446785  |
| B    | 4.647465 | -2.077074 | 0.706518  | C | 2.893714  | 1.687739  | 0.586070  |  | C | -4.279213 | -2.548815 | 1.046887  |
| H    | 5.233383 | -2.673707 | 1.554468  | C | 2.474367  | 2.678631  | -0.326852 |  | C | -5.662900 | -2.605796 | 1.144615  |
| B    | 4.790179 | -0.316608 | 0.682590  | H | 1.647397  | 4.640229  | -0.606594 |  | C | -6.456611 | -1.557932 | 0.636621  |
| H    | 5.398148 | 0.257835  | 1.527010  | H | 1.429683  | 5.098130  | 1.833335  |  | H | -6.463857 | 0.372458  | -0.274780 |
| B    | 4.586140 | 0.218985  | -1.029034 | H | 2.168195  | 3.372739  | 3.471691  |  | H | -3.682653 | -3.389835 | 1.381774  |
| H    | 5.035275 | 1.209198  | -1.509088 | H | 3.090026  | 1.226983  | 2.687247  |  | H | -6.136138 | -3.475086 | 1.588878  |
|      |          |           |           | H | 2.565386  | 2.492253  | -1.391319 |  | H | -7.536910 | -1.605994 | 0.717114  |

**Table S47.** Cartesian coordinates of the ground state ( $S_0$ ) fully optimized geometry of **9HM** in THF from B3LYP calculations (in Å)

| Atom | X         | Y         | Z         |   |           |           |           |   |           |           |           |
|------|-----------|-----------|-----------|---|-----------|-----------|-----------|---|-----------|-----------|-----------|
|      |           |           |           | B | -4.183371 | -0.205513 | 0.899882  | H | 6.233726  | 2.208392  | -1.372038 |
| C    | -1.686300 | -1.047365 | -0.132472 | H | -4.693223 | 0.585903  | 1.615606  | H | 7.888221  | 0.665866  | -0.312829 |
| C    | -2.803479 | 0.311167  | 0.040314  | B | -4.961643 | -1.438065 | -0.117566 | H | 7.101502  | -1.391445 | 0.805473  |
| B    | -2.619369 | -0.495053 | -1.473033 | H | -6.141464 | -1.567312 | -0.110903 | C | 4.612577  | -2.326808 | 1.121238  |
| H    | -2.077497 | 0.062134  | -2.355120 | C | -0.202583 | -0.793684 | -0.130631 | H | 5.442633  | -3.038386 | 1.110496  |
| B    | -2.391039 | -2.226032 | -1.144924 | C | 0.535153  | -0.839437 | 1.062032  | H | 4.341124  | -2.165777 | 2.171183  |
| H    | -1.657597 | -2.835651 | -1.844209 | H | 0.037171  | -1.027516 | 2.005064  | H | 3.753538  | -2.796930 | 0.635975  |
| B    | -2.359601 | -2.424274 | 0.617462  | C | 1.913667  | -0.648177 | 1.057505  | C | -1.320932 | 4.346270  | 0.464997  |
| H    | -1.604373 | -3.171152 | 1.137444  | H | 2.449007  | -0.668332 | 2.000584  | C | -1.586309 | 3.824589  | -0.801568 |
| B    | -2.568918 | -0.810148 | 1.329423  | C | 2.612093  | -0.407619 | -0.135921 | C | -2.052883 | 2.518420  | -0.940814 |
| H    | -1.993709 | -0.461218 | 2.293513  | C | 1.869771  | -0.371062 | -1.327234 | C | -2.257984 | 1.708253  | 0.187014  |
| B    | -3.936773 | -1.925761 | 1.260884  | H | 2.381772  | -0.206113 | -2.270011 | C | -2.002255 | 2.247675  | 1.457440  |
| H    | -4.364894 | -2.404706 | 2.258231  | C | 0.491515  | -0.564249 | -1.328066 | C | -1.535533 | 3.554164  | 1.593364  |
| B    | -3.839442 | -2.803105 | -0.291257 | H | -0.038208 | -0.549431 | -2.272449 | H | -0.957167 | 5.363449  | 0.572140  |
| H    | -4.201297 | -3.927133 | -0.411084 | C | 4.545607  | 0.997056  | -0.810176 | H | -1.434633 | 4.433789  | -1.687017 |
| B    | -3.988152 | -1.603474 | -1.605467 | C | 5.902682  | 1.305031  | -0.868690 | H | -2.266274 | 2.137269  | -1.931592 |
| H    | -4.453388 | -1.850621 | -2.668405 | C | 6.825675  | 0.444413  | -0.274742 | H | -2.175899 | 1.654461  | 2.346452  |
| B    | -4.215092 | -0.007408 | -0.862768 | C | 6.377919  | -0.712281 | 0.361830  | H | -1.343907 | 3.951385  | 2.585142  |
| H    | -4.746985 | 0.921051  | -1.366367 | C | 5.016325  | -1.038060 | 0.438206  | H | 3.821753  | 1.669646  | -1.261136 |
|      |           |           |           | C | 4.081451  | -0.157874 | -0.156514 |   |           |           |           |

**Table S48.** Cartesian coordinates of the first-excited state ( $S_1$ ) fully optimized geometry of **9HM** in THF from B3LYP calculations (in Å)

| Atom | X         | Y         | Z         |   |           |           |           |   |           |           |           |
|------|-----------|-----------|-----------|---|-----------|-----------|-----------|---|-----------|-----------|-----------|
|      |           |           |           | B | -4.166930 | -0.654266 | 0.889749  | H | 6.276476  | 2.279980  | -1.892923 |
| C    | -1.338805 | -1.305766 | -0.155343 | H | -4.866122 | -0.093562 | 1.669602  | H | 7.993053  | 1.292255  | -0.370965 |
| C    | -3.129175 | 0.263689  | 0.046608  | B | -4.654189 | -2.027079 | -0.150892 | H | 7.372209  | -0.496916 | 1.206352  |
| B    | -2.407619 | -0.635485 | -1.293623 | H | -5.791374 | -2.380700 | -0.160722 | C | 5.025147  | -1.674675 | 1.612585  |
| H    | -1.952242 | 0.000041  | -2.186391 | C | 0.111729  | -0.970308 | -0.157097 | H | 5.942493  | -2.240489 | 1.790180  |
| B    | -1.971298 | -2.439654 | -1.155608 | C | 0.853671  | -0.926789 | 1.045884  | H | 4.682229  | -1.313115 | 2.589915  |
| H    | -1.230388 | -2.968392 | -1.919571 | H | 0.352286  | -1.122150 | 1.986041  | H | 4.265526  | -2.357310 | 1.228271  |
| B    | -1.929834 | -2.617770 | 0.628474  | C | 2.201514  | -0.620654 | 1.047174  | C | -2.582780 | 4.500420  | 0.455957  |
| H    | -1.157029 | -3.282439 | 1.239649  | H | 2.719011  | -0.550859 | 1.994845  | C | -2.702173 | 3.923065  | -0.812395 |
| B    | -2.352499 | -0.879872 | 1.143363  | C | 2.890358  | -0.321289 | -0.159297 | C | -2.872407 | 2.548867  | -0.948023 |
| H    | -1.853974 | -0.433765 | 2.123441  | C | 2.134340  | -0.356515 | -1.365120 | C | -2.932438 | 1.708801  | 0.186257  |
| B    | -3.548310 | -2.269967 | 1.239716  | H | 2.627784  | -0.166320 | -2.311617 | C | -2.811418 | 2.308505  | 1.459639  |
| H    | -3.905690 | -2.792116 | 2.247839  | C | 0.795762  | -0.697781 | -1.363951 | C | -2.641515 | 3.683262  | 1.589675  |
| B    | -3.336793 | -3.182114 | -0.297076 | H | 0.258971  | -0.750821 | -2.303472 | H | -2.448005 | 5.572753  | 0.559587  |
| H    | -3.558270 | -4.346618 | -0.408931 | C | 4.702473  | 1.041690  | -1.137437 | H | -2.663770 | 4.548068  | -1.699948 |
| B    | -3.613856 | -1.983387 | -1.610399 | C | 6.000498  | 1.498297  | -1.194168 | H | -2.967504 | 2.113575  | -1.936773 |
| H    | -4.019723 | -2.294945 | -2.685006 | C | 6.965043  | 0.948272  | -0.327366 | H | -2.858646 | 1.686037  | 2.346470  |
| B    | -4.206542 | -0.471889 | -0.917319 | C | 6.607543  | -0.056030 | 0.575077  | H | -2.555602 | 4.120881  | 2.580106  |
| H    | -4.937015 | 0.230369  | -1.537508 | C | 5.301792  | -0.532459 | 0.670385  | H | 3.951742  | 1.486576  | -1.779181 |
|      |           |           |           | C | 4.297992  | 0.048630  | -0.194250 |   |           |           |           |

**Table S49.** Cartesian coordinates of the ground state ( $S_0$ ) fully optimized geometry of **10HV** in THF from B3LYP calculations (in Å)

| Atom | X        | Y         | Z         |   |           |           |           |   |           |           |           |
|------|----------|-----------|-----------|---|-----------|-----------|-----------|---|-----------|-----------|-----------|
|      |          |           |           | B | 4.275850  | -0.241489 | -0.923313 | H | -5.910983 | 2.685930  | 1.219633  |
| C    | 1.769483 | -1.018770 | 0.137138  | H | 4.797450  | 0.534596  | -1.647306 | H | -7.676280 | 1.263105  | 0.168357  |
| C    | 2.918138 | 0.311701  | -0.051649 | B | 5.034392  | -1.489229 | 0.090277  | H | -7.062698 | -0.922932 | -0.801238 |
| B    | 2.730048 | -0.484441 | 1.466112  | H | 6.210582  | -1.647311 | 0.071717  | C | -4.760035 | -2.140500 | -0.873010 |
| H    | 2.209896 | 0.088414  | 2.351309  | C | 0.292674  | -0.728203 | 0.153589  | H | -5.487251 | -2.434349 | -1.629608 |
| B    | 2.456203 | -2.210532 | 1.146451  | C | -0.458235 | -0.728629 | -1.033523 | C | 1.529171  | 4.379476  | -0.480963 |
| H    | 1.715977 | -2.800240 | 1.855547  | H | 0.025658  | -0.909908 | -1.985122 | C | 1.786435  | 3.854839  | 0.786051  |
| B    | 2.401309 | -2.414183 | -0.614723 | C | -1.829731 | -0.502205 | -1.010763 | C | 2.222879  | 2.538461  | 0.927147  |
| H    | 1.622684 | -3.143976 | -1.124407 | H | -2.383397 | -0.503047 | -1.943541 | C | 2.405234  | 1.720971  | -0.199245 |
| B    | 2.642637 | -0.808015 | -1.334196 | C | -2.507018 | -0.269762 | 0.196532  | C | 2.157919  | 2.263088  | -1.470230 |
| H    | 2.067959 | -0.447741 | -2.294340 | C | -1.755870 | -0.275767 | 1.380470  | C | 1.721475  | 3.579786  | -1.608020 |
| B    | 3.983539 | -1.956404 | -1.275708 | H | -2.253699 | -0.111246 | 2.330980  | H | 1.188967  | 5.404631  | -0.589535 |
| H    | 4.389721 | -2.448787 | -2.275695 | C | -0.382035 | -0.506638 | 1.362346  | H | 1.651954  | 4.469610  | 1.670432  |
| B    | 3.881075 | -2.825770 | 0.280372  | H | 0.157872  | -0.523601 | 2.300939  | H | 2.430537  | 2.154885  | 1.918184  |
| H    | 4.216604 | -3.957884 | 0.400783  | C | -4.335786 | 1.284968  | 0.784187  | H | 2.314592  | 1.663655  | -2.358262 |
| B    | 4.072608 | -1.625650 | 1.588713  | C | -5.658403 | 1.724802  | 0.782433  | H | 1.535926  | 3.978914  | -2.600188 |
| H    | 4.542426 | -1.880787 | 2.647758  | C | -6.642827 | 0.931124  | 0.194508  | H | -3.560617 | 1.919085  | 1.204215  |
| B    | 4.330925 | -0.038121 | 0.838101  | C | -6.292096 | -0.296986 | -0.359209 | C | -3.864528 | -3.054661 | -0.481222 |
| H    | 4.890388 | 0.878901  | 1.332744  | C | -4.969064 | -0.776849 | -0.339280 | H | -3.853916 | -4.042452 | -0.931469 |
|      |          |           |           | C | -3.963442 | 0.054055  | 0.220250  | H | -3.129313 | -2.864092 | 0.292448  |

**Table S50.** Cartesian coordinates of the first-excited state ( $S_1$ ) fully optimized geometry of **10HV** in THF from B3LYP calculations (in Å)

| Atom | X        | Y         | Z         |   |           |           |           |   |           |           |           |
|------|----------|-----------|-----------|---|-----------|-----------|-----------|---|-----------|-----------|-----------|
|      |          |           |           | B | 4.256638  | -0.716403 | -0.908714 | H | -6.087699 | 2.774175  | 1.644826  |
| C    | 1.409245 | -1.272733 | 0.182093  | H | 4.958641  | -0.178871 | -1.702803 | H | -7.798366 | 1.789323  | 0.124286  |
| C    | 3.241592 | 0.232604  | -0.062761 | B | 4.716963  | -2.089072 | 0.134950  | H | -7.223362 | -0.190153 | -1.245456 |
| B    | 2.532370 | -0.614849 | 1.293601  | H | 5.840779  | -2.484669 | 0.131396  | C | -5.044132 | -1.610994 | -1.176025 |
| H    | 2.109239 | 0.041789  | 2.187503  | C | -0.022285 | -0.873714 | 0.207659  | H | -5.772424 | -1.811819 | -1.958738 |
| B    | 2.036616 | -2.402695 | 1.184872  | C | -0.768809 | -0.767902 | -0.976928 | C | 2.838223  | 4.487580  | -0.515346 |
| H    | 1.296582 | -2.903591 | 1.969135  | H | -0.290666 | -0.958636 | -1.930400 | C | 2.960654  | 3.920562  | 0.756644  |
| B    | 1.959930 | -2.603199 | -0.594802 | C | -2.112064 | -0.407340 | -0.951382 | C | 3.085126  | 2.541881  | 0.905495  |
| H    | 1.162284 | -3.259433 | -1.183461 | H | -2.646800 | -0.293241 | -1.887718 | C | 3.094082  | 1.687478  | -0.217339 |
| B    | 2.428768 | -0.885542 | -1.134618 | C | -2.769319 | -0.131424 | 0.271633  | C | 2.970937  | 2.276040  | -1.493700 |
| H    | 1.932772 | -0.438001 | -2.115636 | C | -2.015845 | -0.219570 | 1.458568  | C | 2.846959  | 3.655272  | -1.638493 |
| B    | 3.578544 | -2.312829 | -1.234888 | H | -2.494354 | -0.031136 | 2.414422  | H | 2.739793  | 5.562835  | -0.629770 |
| H    | 3.900722 | -2.859695 | -2.242553 | C | -0.682112 | -0.599864 | 1.427325  | H | 2.960852  | 4.556085  | 1.637695  |
| B    | 3.365432 | -3.198776 | 0.314610  | H | -0.135630 | -0.692680 | 2.358731  | H | 3.183182  | 2.115447  | 1.897884  |
| H    | 3.550524 | -4.369219 | 0.437566  | C | -4.552632 | 1.381006  | 1.096645  | H | 2.979463  | 1.642261  | -2.373761 |
| B    | 3.699189 | -1.996306 | 1.609376  | C | -5.838116 | 1.907663  | 1.041725  | H | 2.757967  | 4.083026  | -2.633103 |
| H    | 4.107877 | -2.311969 | 2.682392  | C | -6.804674 | 1.358699  | 0.173582  | H | -3.802302 | 1.864039  | 1.711912  |
| B    | 4.331957 | -0.515833 | 0.884944  | C | -6.478846 | 0.263139  | -0.599541 | C | -4.175727 | -2.615830 | -0.860429 |
| H    | 5.092424 | 0.176821  | 1.480049  | C | -5.198997 | -0.341306 | -0.509897 | H | -4.176634 | -3.531281 | -1.440904 |
|      |          |           |           | C | -4.178147 | 0.287749  | 0.302319  | H | -3.507587 | -2.567858 | -0.011220 |

**Table S51.** Cartesian coordinates of the ground state ( $S_0$ ) fully optimized geometry of **11HI** in THF from B3LYP calculations (in Å)

| Atom | X         | Y         | Z         |   |           |           |           |   |           |           |           |
|------|-----------|-----------|-----------|---|-----------|-----------|-----------|---|-----------|-----------|-----------|
|      |           |           |           | B | -5.180360 | -1.804828 | 0.119636  | C | -2.439439 | 3.836936  | 0.597967  |
| C    | -1.972028 | -1.043056 | 0.206878  | H | -6.337297 | -2.067680 | 0.086053  | H | -2.195831 | 4.317495  | -0.689070 |
| C    | -3.227718 | 0.167941  | -0.074971 | C | -0.526969 | -0.622280 | 0.235189  | C | -2.285201 | 3.447252  | -1.776006 |
| B    | -2.823696 | -0.986458 | -1.290837 | C | 0.250539  | -0.630918 | -0.932967 | H | -2.605704 | 2.105110  | -1.578178 |
| H    | -2.258592 | -0.626022 | -2.256688 | H | -0.190611 | -0.913074 | -1.880726 | H | -2.838005 | 1.608278  | -0.286056 |
| B    | -2.459826 | -2.525860 | -0.482454 | C | 1.597196  | -0.281226 | -0.896982 | H | -2.760098 | 2.495328  | 0.799057  |
| H    | -1.607454 | -3.208237 | -0.936826 | H | 2.165468  | -0.276772 | -1.821528 | C | -2.384447 | 4.505591  | 1.451218  |
| B    | -2.575442 | -2.238558 | 1.264140  | C | 2.223718  | 0.082247  | 0.305475  | H | -1.945895 | 5.362427  | -0.844353 |
| H    | -1.803463 | -2.722682 | 2.017960  | C | 1.443252  | 0.082246  | 1.471716  | H | -2.109277 | 3.810528  | -2.783581 |
| B    | -3.007863 | -0.529702 | 1.486397  | H | 1.901236  | 0.345743  | 2.419930  | H | -2.684243 | 1.449556  | -2.436387 |
| H    | -2.562633 | 0.131549  | 2.350512  | C | 0.095830  | -0.266673 | 1.440773  | C | -2.959403 | 2.145615  | 1.804230  |
| B    | -4.247407 | -1.778493 | 1.642147  | H | -0.464365 | -0.273125 | 2.367544  | C | 4.539140  | -1.732766 | -0.576801 |
| H    | -4.718975 | -2.020149 | 2.703560  | C | 3.921220  | 1.795557  | 0.865070  | C | 5.281321  | -2.738915 | 0.324923  |
| B    | -3.918900 | -3.021830 | 0.403287  | C | 5.217496  | 2.298047  | 0.927414  | C | 5.081330  | -3.763823 | -0.005459 |
| H    | -4.156204 | -4.171799 | 0.576570  | C | 6.277271  | 1.509960  | 0.476932  | C | 4.958858  | -2.648986 | 1.366944  |
| B    | -4.059271 | -2.245419 | -1.198632 | C | 6.024282  | 0.231519  | -0.014696 | C | 6.365304  | -2.585941 | 0.294746  |
| H    | -4.395739 | -2.822315 | -2.179116 | C | 4.725875  | -0.298488 | -0.085130 | H | 4.963001  | -1.897175 | -2.048741 |
| B    | -4.509763 | -0.547585 | -0.943225 | C | 3.652510  | 0.512456  | 0.353430  | H | 4.775872  | -2.921469 | -2.388294 |
| H    | -5.079573 | 0.141232  | -1.717428 | H | 3.089262  | 2.409458  | 1.197877  | H | 6.030663  | -1.692334 | -2.182877 |
| B    | -4.625956 | -0.260711 | 0.803542  | H | 5.396569  | 3.295556  | 1.317252  | H | 4.410274  | -1.216329 | -2.704168 |
| H    | -5.275902 | 0.626781  | 1.237663  | H | 7.295851  | 1.885281  | 0.512955  | H | 3.475376  | -1.976507 | -0.513649 |
|      |           |           |           | H | 6.860484  | -0.378105 | -0.345306 |   |           |           |           |

**Table S52.** Cartesian coordinates of the first-excited state ( $S_1$ ) fully optimized geometry of **11HI** in THF from B3LYP calculations (in Å)

| Atom | X         | Y         | Z         |   |           |           |           |  |   |           |           |           |
|------|-----------|-----------|-----------|---|-----------|-----------|-----------|--|---|-----------|-----------|-----------|
|      |           |           |           | B | -4.916093 | -2.258373 | 0.164787  |  | C | -3.483508 | 3.863494  | 0.499259  |
| C    | -1.672778 | -1.268291 | 0.292333  | H | -6.020508 | -2.703491 | 0.140216  |  | H | -3.334815 | 4.361992  | -0.799075 |
| C    | -3.566480 | 0.131565  | -0.115719 | C | -0.256053 | -0.813353 | 0.347607  |  | C | -3.260363 | 3.468209  | -1.872418 |
| B    | -2.640353 | -1.014464 | -1.084781 | C | 0.543713  | -0.769581 | -0.816772 |  | H | -3.327767 | 2.095959  | -1.652968 |
| H    | -2.122982 | -0.595669 | -2.067156 | H | 0.112384  | -1.053622 | -1.768938 |  | H | -3.476858 | 1.575465  | -0.348156 |
| B    | -2.112493 | -2.673718 | -0.426077 | C | 1.861121  | -0.352814 | -0.765872 |  | H | -3.551708 | 2.492124  | 0.724175  |
| H    | -1.255857 | -3.312246 | -0.946643 | H | 2.426616  | -0.284166 | -1.687435 |  | C | -3.548106 | 4.547943  | 1.340228  |
| B    | -2.272239 | -2.380836 | 1.335843  | C | 2.454474  | 0.063683  | 0.457055  |  | H | -3.279958 | 5.432405  | -0.972340 |
| H    | -1.538169 | -2.794988 | 2.173625  | C | 1.639572  | 0.033759  | 1.621470  |  | H | -3.150451 | 3.843711  | -2.885724 |
| B    | -2.855657 | -0.613239 | 1.321395  | H | 2.063286  | 0.321070  | 2.577584  |  | H | -3.272166 | 1.413258  | -2.493805 |
| H    | -2.503955 | 0.116118  | 2.189089  | C | 0.335532  | -0.420619 | 1.570888  |  | C | -3.670743 | 2.117961  | 1.735120  |
| B    | -3.968917 | -2.031772 | 1.669767  | H | -0.247514 | -0.468479 | 2.482762  |  | C | 4.857680  | -1.328729 | -0.928822 |
| H    | -4.410993 | -2.302966 | 2.741083  | C | 4.049095  | 1.711237  | 1.357767  |  | C | 5.805457  | -2.355688 | -0.268326 |
| B    | -3.522762 | -3.288663 | 0.461654  | C | 5.272463  | 2.342533  | 1.386172  |  | C | 5.686353  | -3.328436 | -0.754757 |
| H    | -3.658577 | -4.457343 | 0.644618  | C | 6.332484  | 1.830773  | 0.610585  |  | C | 5.580868  | -2.476137 | 0.795338  |
| B    | -3.715344 | -2.501769 | -1.145283 | C | 6.150420  | 0.681802  | -0.159763 |  | C | 6.854066  | -2.057341 | -0.364034 |
| H    | -3.970817 | -3.117960 | -2.131038 | C | 4.929146  | 0.009284  | -0.207347 |  | H | 5.158247  | -1.191564 | -2.434882 |
| B    | -4.478677 | -0.923312 | -0.944254 | C | 3.818898  | 0.570479  | 0.531272  |  | H | 5.051221  | -2.165196 | -2.922401 |
| H    | -5.173396 | -0.475365 | -1.797612 | H | 3.217499  | 2.128075  | 1.913372  |  | H | 6.180069  | -0.841029 | -2.610956 |
| B    | -4.637310 | -0.623790 | 0.840143  | H | 5.415598  | 3.234676  | 1.985457  |  | H | 4.476531  | -0.489125 | -2.924299 |
| H    | -5.455856 | 0.055564  | 1.369196  | H | 7.301737  | 2.317954  | 0.629833  |  | H | 3.848422  | -1.729134 | -0.818865 |
|      |           |           |           | H | 6.996786  | 0.283305  | -0.708269 |  |   |           |           |           |



**Table S53.** Cartesian coordinates of the ground state ( $S_0$ ) fully optimized geometry of **12MM** in THF from B3LYP calculations (in Å)

| Atom | X        | Y         | Z         |   |           |           |           |  |   |           |           |           |
|------|----------|-----------|-----------|---|-----------|-----------|-----------|--|---|-----------|-----------|-----------|
|      |          |           |           | H | 4.825836  | 0.784728  | -1.521804 |  | H | -6.851347 | -2.092933 | 0.067572  |
| C    | 1.835244 | -1.077708 | 0.000794  | B | 5.115559  | -1.418793 | -0.020546 |  | C | -3.593055 | 2.214569  | -0.076650 |
| C    | 2.927550 | 0.301727  | -0.009400 | H | 6.296112  | -1.526642 | -0.027358 |  | H | -4.183726 | 3.133672  | -0.109657 |
| B    | 2.745915 | -0.667962 | 1.405177  | C | 0.346527  | -0.846853 | 0.003639  |  | H | -2.939478 | 2.264896  | 0.800969  |
| H    | 2.185493 | -0.214238 | 2.335067  | C | -0.376543 | -0.816112 | -1.197838 |  | H | -2.936061 | 2.203671  | -0.953051 |
| B    | 2.547109 | -2.354081 | 0.885518  | H | 0.137194  | -0.940514 | -2.143116 |  | C | -4.247622 | -2.834563 | 0.082236  |
| H    | 1.811652 | -3.044274 | 1.503153  | C | -1.758200 | -0.641876 | -1.195777 |  | H | -5.053076 | -3.572667 | 0.113037  |
| B    | 2.535849 | -2.355599 | -0.888884 | H | -2.295090 | -0.621475 | -2.139675 |  | H | -3.626484 | -3.050133 | -0.793859 |
| H    | 1.793898 | -3.048657 | -1.495380 | C | -2.469562 | -0.496682 | 0.003098  |  | H | -3.612492 | -2.991718 | 0.960689  |
| B    | 2.728514 | -0.671133 | -1.417509 | C | -1.746226 | -0.543949 | 1.202520  |  | C | 1.388594  | 4.339720  | 0.022883  |
| H    | 2.152337 | -0.226098 | -2.341904 | H | -2.273795 | -0.446668 | 2.146877  |  | C | 1.700347  | 3.694958  | 1.219650  |
| B    | 4.111855 | -1.766937 | -1.456897 | C | -0.364408 | -0.718583 | 1.205544  |  | C | 2.184417  | 2.388283  | 1.209129  |
| H    | 4.554252 | -2.125069 | -2.496648 | H | 0.157938  | -0.765842 | 2.152870  |  | C | 2.361781  | 1.699201  | -0.000319 |
| B    | 4.012920 | -2.812070 | -0.011241 | C | -4.492124 | 0.999139  | -0.036044 |  | C | 2.059840  | 2.362950  | -1.198801 |
| H    | 4.389030 | -3.936331 | -0.012674 | C | -5.882582 | 1.158724  | -0.036615 |  | C | 1.575221  | 3.669645  | -1.185820 |
| B    | 4.130325 | -1.762933 | 1.429839  | C | -6.729630 | 0.054192  | 0.000348  |  | H | 1.011929  | 5.358067  | 0.031734  |
| H    | 4.587347 | -2.116615 | 2.464781  | C | -6.191955 | -1.229625 | 0.038480  |  | H | 1.572422  | 4.209074  | 2.167314  |
| B    | 4.337752 | -0.090796 | 0.869047  | C | -4.806693 | -1.430023 | 0.040111  |  | H | 2.436521  | 1.909007  | 2.146881  |
| H    | 4.845920 | 0.787277  | 1.476739  | C | -3.955458 | -0.305289 | 0.002492  |  | H | 2.213715  | 1.864753  | -2.147619 |
| B    | 4.327267 | -0.092806 | -0.905342 | H | -6.300208 | 2.161588  | -0.066550 |  | H | 1.348935  | 4.163953  | -2.125613 |
|      |          |           |           | H | -7.806876 | 0.193666  | -0.000554 |  |   |           |           |           |

**Table S54.** Cartesian coordinates of the first-excited state ( $S_1$ ) fully optimized geometry of **12MM** in THF from B3LYP calculations (in Å)

| Atom | X        | Y         | Z         |   |           |           |           |   |           |           |           |
|------|----------|-----------|-----------|---|-----------|-----------|-----------|---|-----------|-----------|-----------|
|      |          |           |           | H | 5.041680  | -0.145924 | -1.634247 | H | -7.161161 | -1.270922 | -1.096775 |
| C    | 1.486509 | -1.336260 | 0.166080  | B | 4.814325  | -2.020016 | 0.243839  | C | -3.726661 | 2.158822  | 1.318276  |
| C    | 3.266121 | 0.243100  | -0.057873 | H | 5.953912  | -2.364082 | 0.286098  | H | -4.215752 | 3.133450  | 1.375361  |
| B    | 2.533474 | -0.613272 | 1.297006  | C | 0.035875  | -1.010289 | 0.131507  | H | -3.470297 | 1.867611  | 2.343099  |
| H    | 2.056160 | 0.046839  | 2.160348  | C | -0.683470 | -1.004972 | -1.084235 | H | -2.789878 | 2.270875  | 0.769245  |
| B    | 2.117104 | -2.425546 | 1.214583  | H | -0.165307 | -1.224441 | -2.010018 | C | -4.681598 | -2.248465 | -1.235908 |
| H    | 1.369769 | -2.938917 | 1.983036  | C | -2.036523 | -0.718161 | -1.114621 | H | -5.546214 | -2.908564 | -1.331080 |
| B    | 2.108917 | -2.664144 | -0.562948 | H | -2.549515 | -0.692464 | -2.068773 | H | -4.267524 | -2.113872 | -2.241523 |
| H    | 1.355536 | -3.359668 | -1.164248 | C | -2.741993 | -0.378853 | 0.068596  | H | -3.921276 | -2.754520 | -0.637971 |
| B    | 2.524400 | -0.939590 | -1.127128 | C | -2.014054 | -0.375812 | 1.285918  | C | 2.695831  | 4.461352  | -0.620909 |
| H    | 2.039738 | -0.532610 | -2.131144 | H | -2.528507 | -0.168843 | 2.216921  | C | 2.797425  | 3.928131  | 0.667923  |
| B    | 3.734379 | -2.320378 | -1.157168 | C | -0.672347 | -0.712560 | 1.316921  | C | 2.975816  | 2.560427  | 0.853031  |
| H    | 4.113727 | -2.873493 | -2.140737 | H | -0.154171 | -0.742492 | 2.268061  | C | 3.061831  | 1.682875  | -0.250150 |
| B    | 3.504931 | -3.182073 | 0.405545  | C | -4.649828 | 1.157388  | 0.671320  | C | 2.958624  | 2.238121  | -1.544511 |
| H    | 3.735013 | -4.340206 | 0.560624  | C | -6.004345 | 1.446382  | 0.609035  | C | 2.780483  | 3.606476  | -1.724561 |
| B    | 3.746271 | -1.937345 | 1.682217  | C | -6.902665 | 0.580869  | -0.029589 | H | 2.555006  | 5.528463  | -0.763392 |
| H    | 4.134772 | -2.209307 | 2.774145  | C | -6.446714 | -0.598809 | -0.633602 | H | 2.738931  | 4.582327  | 1.533121  |
| B    | 4.339201 | -0.445734 | 0.947376  | C | -5.101876 | -0.934644 | -0.627334 | H | 3.057006  | 2.159915  | 1.857637  |
| H    | 5.051719 | 0.286173  | 1.554305  | C | -4.166606 | -0.051624 | 0.037746  | H | 3.025959  | 1.586278  | -2.408674 |
| B    | 4.333944 | -0.689074 | -0.849454 | H | -6.372351 | 2.368679  | 1.045597  | H | 2.708631  | 4.009211  | -2.730837 |
|      |          |           |           | H | -7.959353 | 0.825416  | -0.055877 |   |           |           |           |

**Table S55.** Cartesian coordinates of the ground state ( $S_0$ ) fully optimized geometry of **13PP** in THF from B3LYP calculations (in Å)

| Atom | X        | Y         | Z         |   |           |           |           |   |           |           |           |
|------|----------|-----------|-----------|---|-----------|-----------|-----------|---|-----------|-----------|-----------|
| C    | 2.360049 | -1.140310 | -0.000123 | C | 0.168977  | -0.738003 | -1.202546 | H | 2.212651  | 4.135362  | 2.150160  |
| C    | 3.510778 | 0.191247  | 0.000004  | H | 0.682732  | -0.845037 | -2.149825 | H | 2.978111  | 1.800874  | 2.150517  |
| B    | 3.278605 | -0.771206 | 1.411148  | C | -1.204404 | -0.507381 | -1.200042 | H | 2.977187  | 1.801269  | -2.150034 |
| H    | 2.729798 | -0.298168 | 2.338306  | H | -1.733334 | -0.427164 | -2.144992 | H | 2.211736  | 4.135758  | -2.148919 |
| B    | 3.010668 | -2.446455 | 0.886965  | C | -1.918236 | -0.382097 | -0.000032 | C | -2.948636 | 2.407085  | -0.000393 |
| H    | 2.242769 | -3.105597 | 1.498995  | C | -1.204358 | -0.507345 | 1.199952  | H | -1.919193 | 2.038568  | -0.000257 |
| B    | 3.010630 | -2.446247 | -0.887537 | H | -1.733247 | -0.427097 | 2.144922  | C | -3.816609 | -2.674362 | 0.000365  |
| H    | 2.242706 | -3.105250 | -1.499686 | C | 0.169023  | -0.737974 | 1.202410  | H | -2.723198 | -2.668331 | 0.000283  |
| B    | 3.278542 | -0.770875 | -1.411351 | H | 0.682815  | -0.844969 | 2.149674  | C | -3.123210 | 3.261759  | 1.269356  |
| H    | 2.729676 | -0.297644 | -2.338377 | C | -3.883638 | 1.198330  | -0.000202 | H | -2.408230 | 4.091735  | 1.274324  |
| B    | 4.614181 | -1.924763 | -1.443762 | C | -5.267984 | 1.409228  | -0.000215 | H | -4.129466 | 3.689747  | 1.332255  |
| H    | 5.048150 | -2.299500 | -2.481210 | C | -6.158566 | 0.340578  | -0.000043 | H | -2.958624 | 2.666780  | 2.173150  |
| B    | 4.461101 | -2.966486 | -0.000383 | C | -5.672715 | -0.962841 | 0.000147  | C | -3.123068 | 3.261223  | -1.270524 |
| H    | 4.788540 | -4.105881 | -0.000525 | C | -4.296793 | -1.223663 | 0.000161  | H | -2.958378 | 2.665863  | -2.174048 |
| B    | 4.614246 | -1.925099 | 1.443229  | C | -3.398427 | -0.130666 | -0.000017 | H | -2.408096 | 4.091205  | -1.275761 |
| H    | 5.048267 | -2.300071 | 2.480570  | H | -5.653638 | 2.424761  | -0.000361 | H | -4.129322 | 3.689173  | -1.333715 |
| B    | 4.897320 | -0.262495 | 0.887142  | H | -7.229492 | 0.523245  | -0.000055 | C | -4.264772 | -3.422317 | 1.270481  |
| H    | 5.437915 | 0.592835  | 1.499335  | H | -6.373248 | -1.792991 | 0.000282  | H | -3.866457 | -4.442654 | 1.275066  |
| B    | 4.897284 | -0.262284 | -0.887309 | C | 2.146444  | 4.291681  | 0.000648  | H | -5.356068 | -3.491584 | 1.333706  |
| H    | 5.437842 | 0.593193  | -1.499329 | C | 2.367658  | 3.624105  | 1.205002  | H | -3.911309 | -2.916308 | 2.174350  |
| B    | 5.622719 | -1.621884 | -0.000255 | C | 2.795713  | 2.297849  | 1.205977  | C | -4.264955 | -3.422750 | -1.269432 |
| H    | 6.797580 | -1.780288 | -0.000298 | C | 3.005605  | 1.611750  | 0.000218  | H | -3.866627 | -4.443083 | -1.273729 |
| C    | 0.882575 | -0.846870 | -0.000079 | C | 2.795200  | 2.298070  | -1.205324 | H | -3.911632 | -2.917044 | -2.173526 |
|      |          |           |           | C | 2.367146  | 3.624327  | -1.203922 | H | -5.356258 | -3.492054 | -1.332473 |
|      |          |           |           | H | 1.814097  | 5.325398  | 0.000815  |   |           |           |           |

**Table S56.** Cartesian coordinates of the first-excited state ( $S_1$ ) fully optimized geometry of **13PP** in THF from B3LYP calculations (in Å)

| Atom | X        | Y         | Z         |   |           |           |           |   |           |           |           |
|------|----------|-----------|-----------|---|-----------|-----------|-----------|---|-----------|-----------|-----------|
|      |          |           |           | C | -0.093376 | -0.900492 | -1.200130 | H | 3.479066  | 4.213145  | 2.118710  |
| C    | 2.038003 | -1.466308 | 0.007547  | H | 0.417863  | -1.050736 | -2.144365 | H | 3.707765  | 1.759286  | 2.134563  |
| C    | 3.866900 | 0.081770  | -0.002781 | C | -1.436707 | -0.534599 | -1.204356 | H | 3.709633  | 1.729359  | -2.163455 |
| B    | 3.126420 | -0.895254 | 1.217866  | H | -1.952420 | -0.403774 | -2.151671 | H | 3.480967  | 4.183188  | -2.181967 |
| H    | 2.661251 | -0.341332 | 2.160314  | C | -2.126511 | -0.333611 | -0.001070 | C | -2.920015 | 2.545768  | 0.010091  |
| B    | 2.665086 | -2.672827 | 0.913118  | C | -1.436323 | -0.515626 | 1.205015  | H | -1.927320 | 2.096416  | -0.023342 |
| H    | 1.911602 | -3.276711 | 1.607942  | H | -1.951806 | -0.369956 | 2.150280  | C | -4.306273 | -2.380043 | -0.019361 |
| B    | 2.665609 | -2.685300 | -0.880804 | C | -0.093065 | -0.881745 | 1.206337  | H | -3.224245 | -2.514084 | -0.014830 |
| H    | 1.912519 | -3.298794 | -1.567593 | H | 0.418269  | -1.017368 | 2.152729  | C | -3.021082 | 3.371699  | 1.315506  |
| B    | 3.127053 | -0.912210 | -1.210013 | C | -3.931964 | 1.431933  | 0.005246  | H | -2.241958 | 4.138636  | 1.305107  |
| H    | 2.662252 | -0.371596 | -2.160327 | C | -5.335518 | 1.802113  | 0.013492  | H | -3.986830 | 3.877366  | 1.413176  |
| B    | 4.301798 | -2.307182 | -1.417914 | C | -6.341998 | 0.851852  | 0.006198  | H | -2.870992 | 2.741423  | 2.195921  |
| H    | 4.668807 | -2.747411 | -2.463067 | C | -5.978044 | -0.484239 | -0.006446 | C | -3.074476 | 3.448064  | -1.236934 |
| B    | 4.041837 | -3.353208 | 0.021238  | C | -4.587828 | -0.901181 | -0.008785 | H | -2.977979 | 2.870206  | -2.159887 |
| H    | 4.241195 | -4.528778 | 0.029506  | C | -3.570476 | 0.070729  | -0.002182 | H | -2.284115 | 4.203305  | -1.221502 |
| B    | 4.301011 | -2.287279 | 1.445872  | H | -5.590573 | 2.854499  | 0.025869  | H | -4.034910 | 3.972551  | -1.256725 |
| H    | 4.667399 | -2.712827 | 2.497298  | H | -7.384113 | 1.144544  | 0.010662  | C | -4.872862 | -3.061460 | 1.248877  |
| B    | 4.950856 | -0.740138 | 0.900659  | H | -6.744986 | -1.248756 | -0.013448 | H | -4.601427 | -4.120380 | 1.228234  |
| H    | 5.678542 | -0.099818 | 1.589623  | C | 3.457716  | 4.369161  | -0.032831 | H | -5.964200 | -2.998785 | 1.303992  |
| B    | 4.951377 | -0.752636 | -0.894011 | C | 3.524905  | 3.673095  | 1.176964  | H | -4.455853 | -2.618384 | 2.157066  |
| H    | 5.679542 | -0.122031 | -1.591373 | C | 3.653453  | 2.285669  | 1.187691  | C | -4.859286 | -3.038248 | -1.305831 |
| B    | 5.385149 | -2.217757 | 0.013726  | C | 3.721044  | 1.551186  | -0.013092 | H | -4.591194 | -4.098201 | -1.300142 |
| H    | 6.511090 | -2.609866 | 0.016788  | C | 3.654507  | 2.268867  | -1.224048 | H | -4.430138 | -2.580727 | -2.201124 |
| C    | 0.613083 | -1.079700 | 0.004536  | C | 3.525965  | 3.656308  | -1.232753 | H | -5.949691 | -2.970825 | -1.372649 |
|      |          |           |           | H | 3.357376  | 5.450405  | -0.040405 |   |           |           |           |
